# Supplementary material for: Pyrrolizine/indolizine-bearing (un)substituted isoindole moiety: design, synthesis, antiproliferative and MDR reversal activities, and in silico studies
Source: Royal Society of Chemistry journal article supplement (doi:10.1039/d3ra05310e), 2023-01-01

# **Pyrrolizine/indolizine-bearing (un)substituted isoindole moiety: design, synthesis, antiproliferative and MDR reversal activities and in silico studies.**

Amr L. AbdelSamad<sup>a</sup>, Mohammed T. El-Saadi<sup>b,c</sup>, Ahmed M. Gouda<sup>b</sup>, Asmaa M. AboulMagd<sup>a\*</sup>

<sup>a</sup> Department of Pharmaceutical Chemistry, Faculty of Pharmacy, Nahda University in Beni-Suef (NUB), Beni-Suef 62513, Egypt.

<sup>b</sup> Department of Pharmaceutical Chemistry, Faculty of Pharmacy, Beni-Suef University, Beni-Suef 62514, Egypt.

<sup>c</sup> Department of Pharmaceutical Chemistry, Faculty of Pharmacy, Sinai University-Kantra Branch, Ismaillia, Egypt.

\* Corresponding author email: [asmaa.aboulmaged@nub.edu.eg](mailto:asmaa.aboulmaged@nub.edu.eg)

## **Supplementary data**

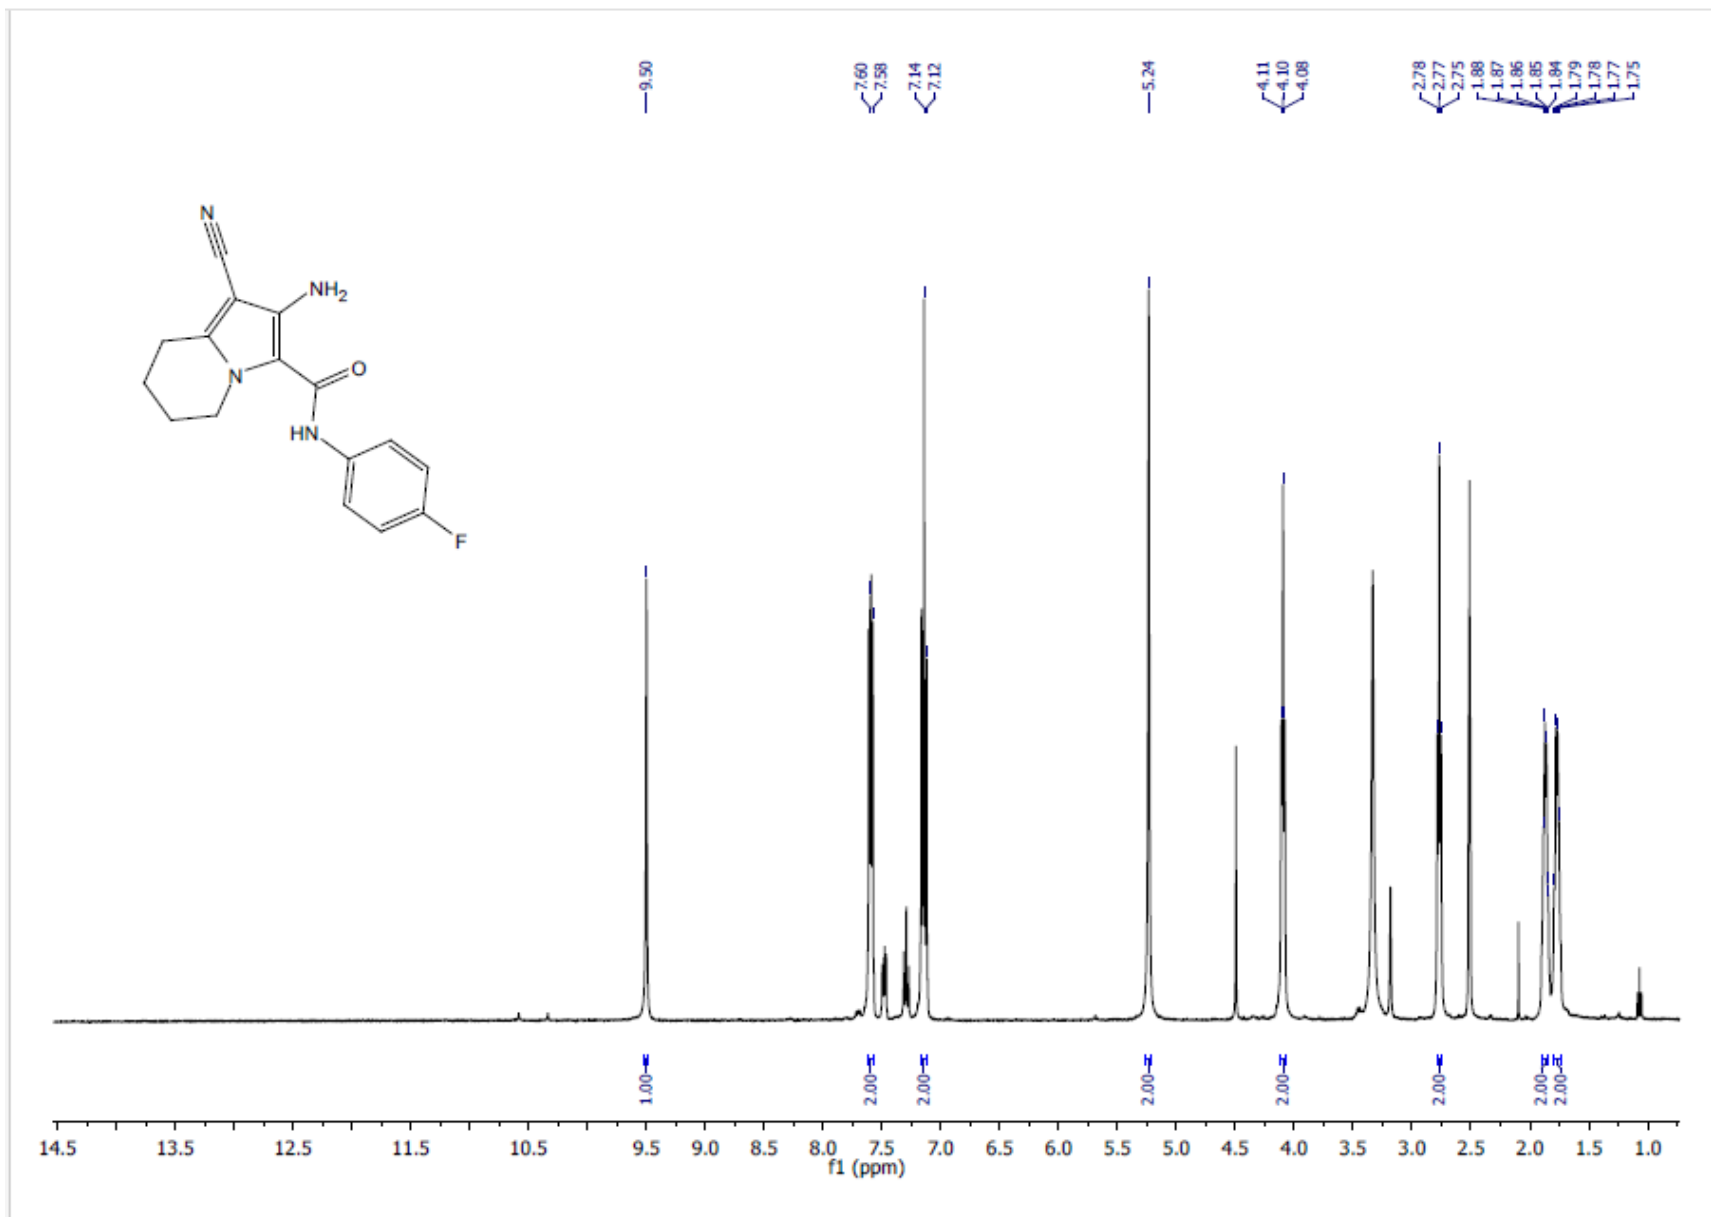

Fig.1.  $^1\text{H}$  NMR of intermediate 5i (400 MHz,  $\text{DMSO-}d_6$ )

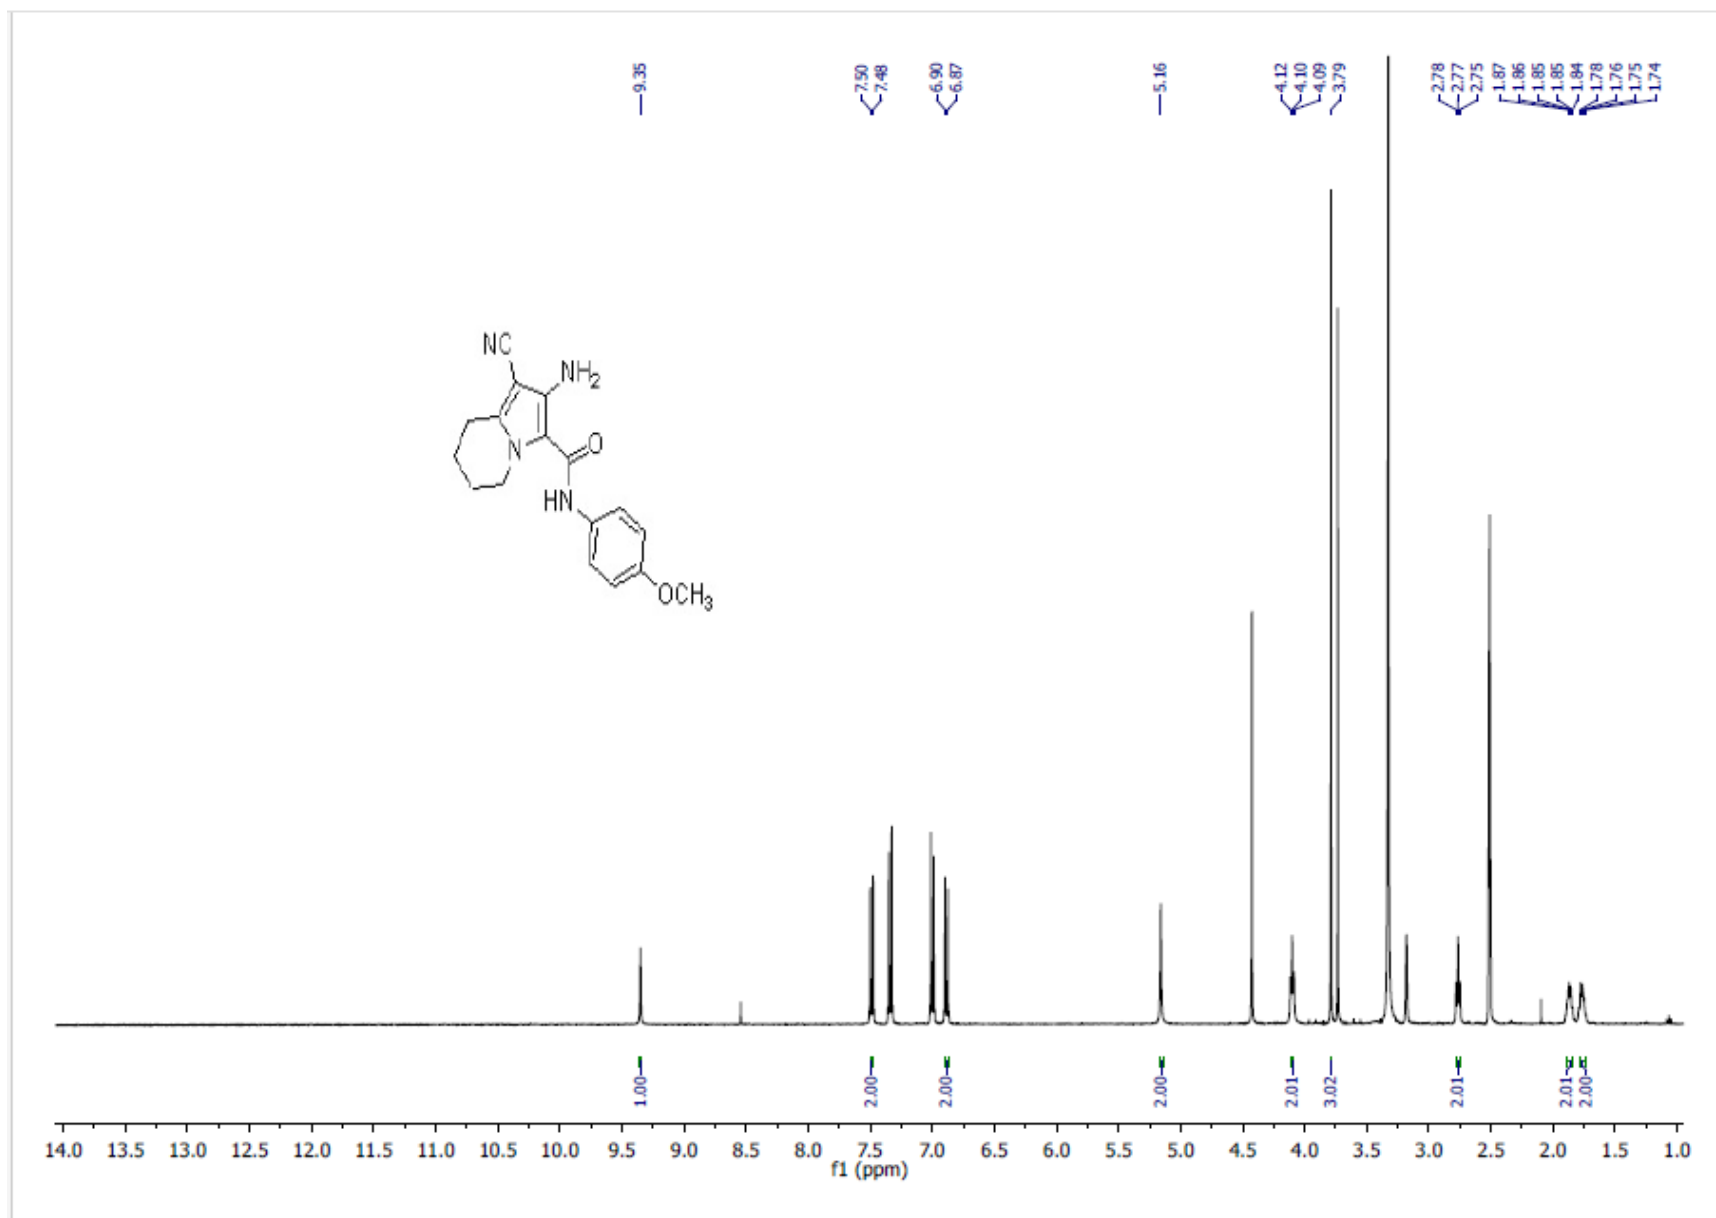

Fig.2. <sup>1</sup>H NMR of intermediate 5j (400 MHz, DMSO-*d*<sub>6</sub>)

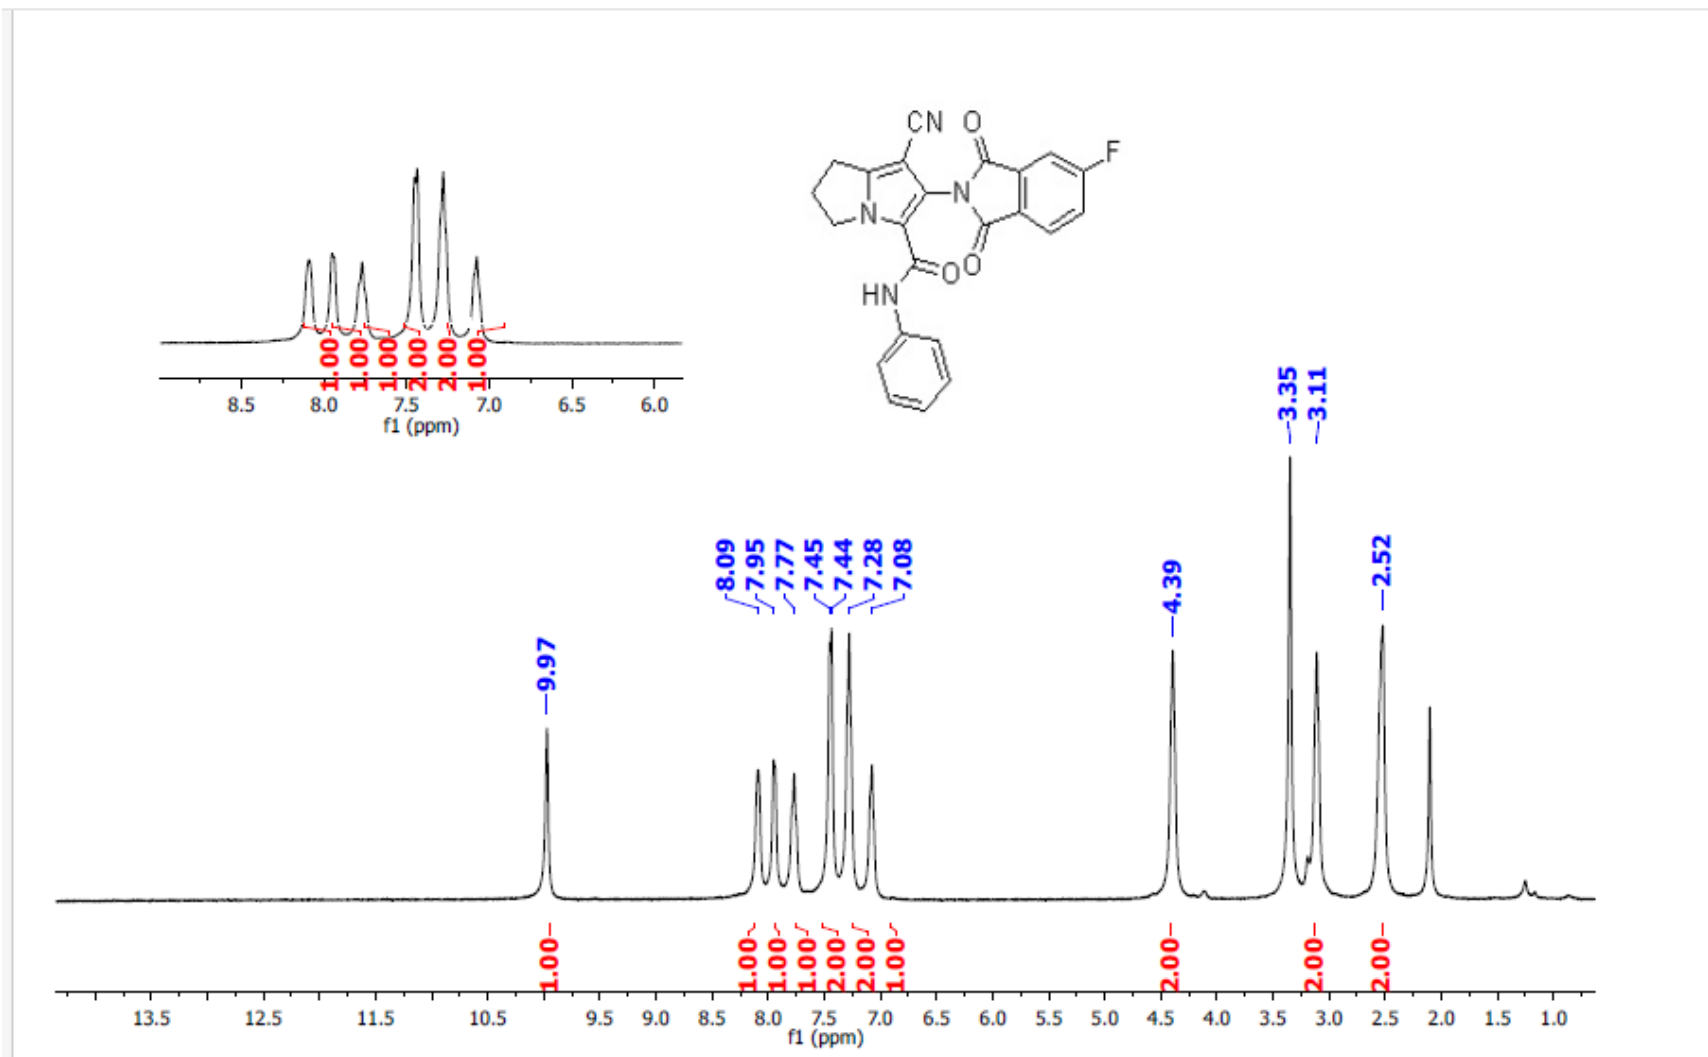

Fig.3. <sup>1</sup>H NMR of compound 6a (400 MHz, DMSO-*d*<sub>6</sub>)

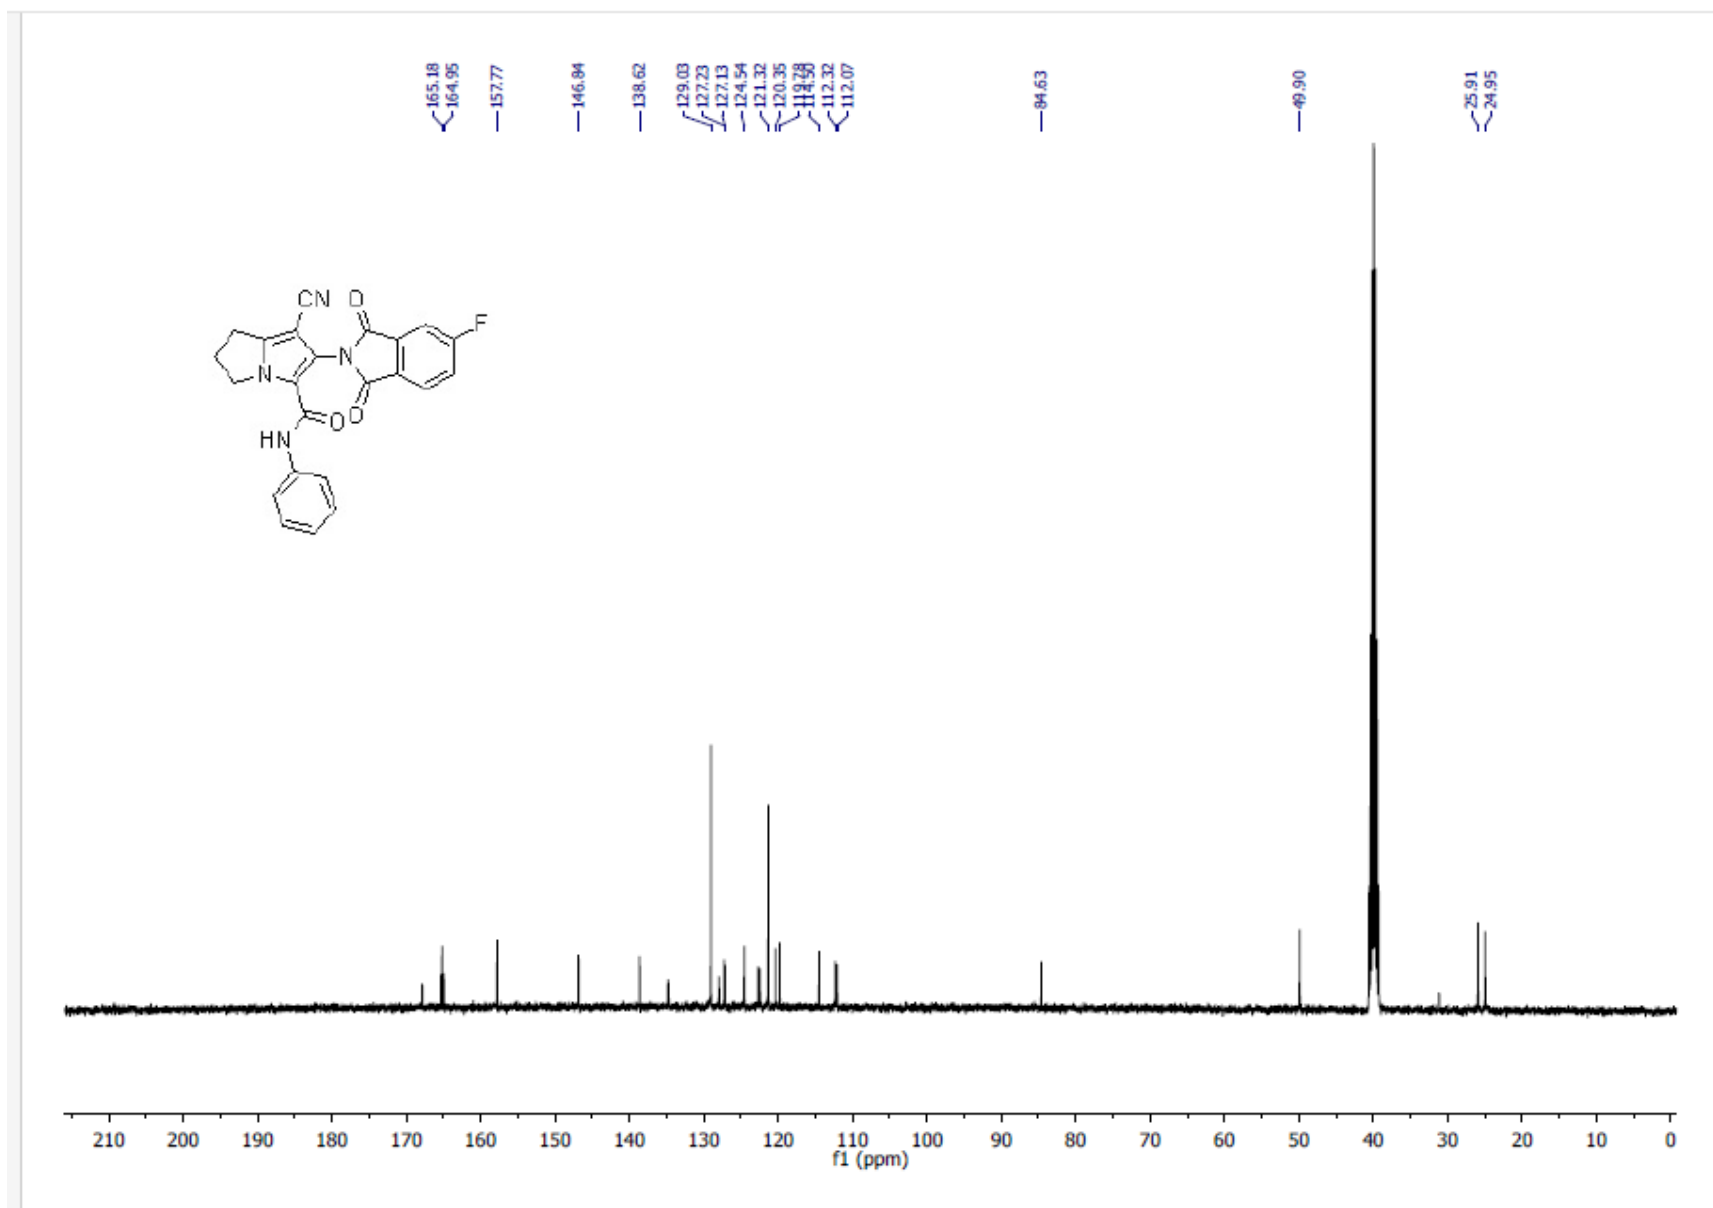

Fig.5. <sup>13</sup>C NMR of compound 6a (100 MHz, DMSO-*d*<sub>6</sub>)

RT: 1.93 - 2.31 SM: 15B

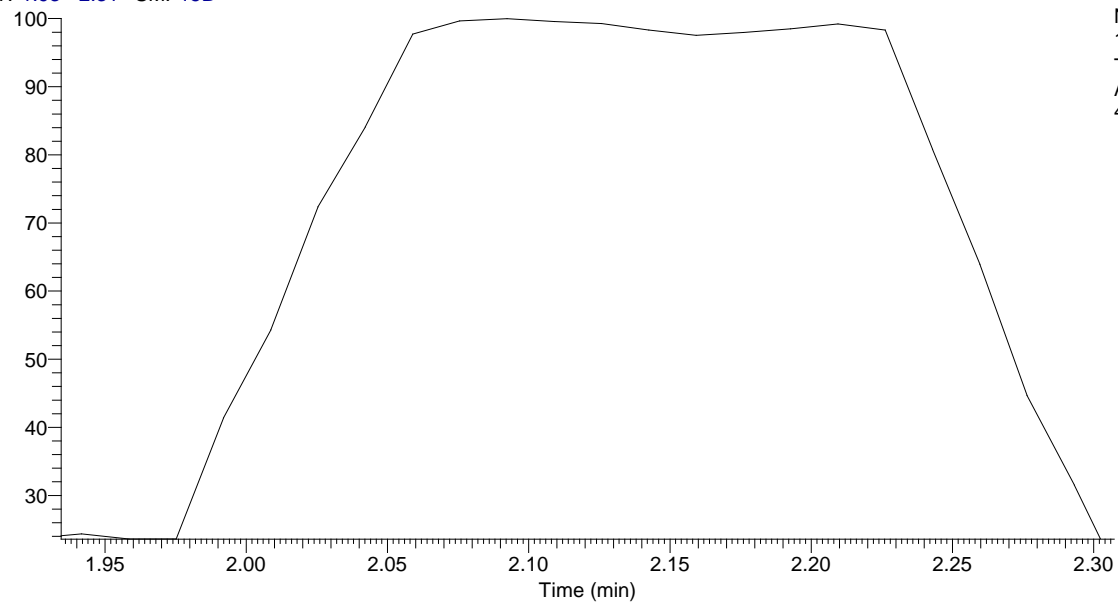

NL:  
1.12E4  
TIC MS  
Amr-Lofly-  
4D

Amr-Lofly-4D #159-163 RT: 2.68-2.74 AV: 5 SB: 6 2.80 , 2.48-2.54 NL: 9.96E1  
T: + c EI Full ms [40.00-1000.00]

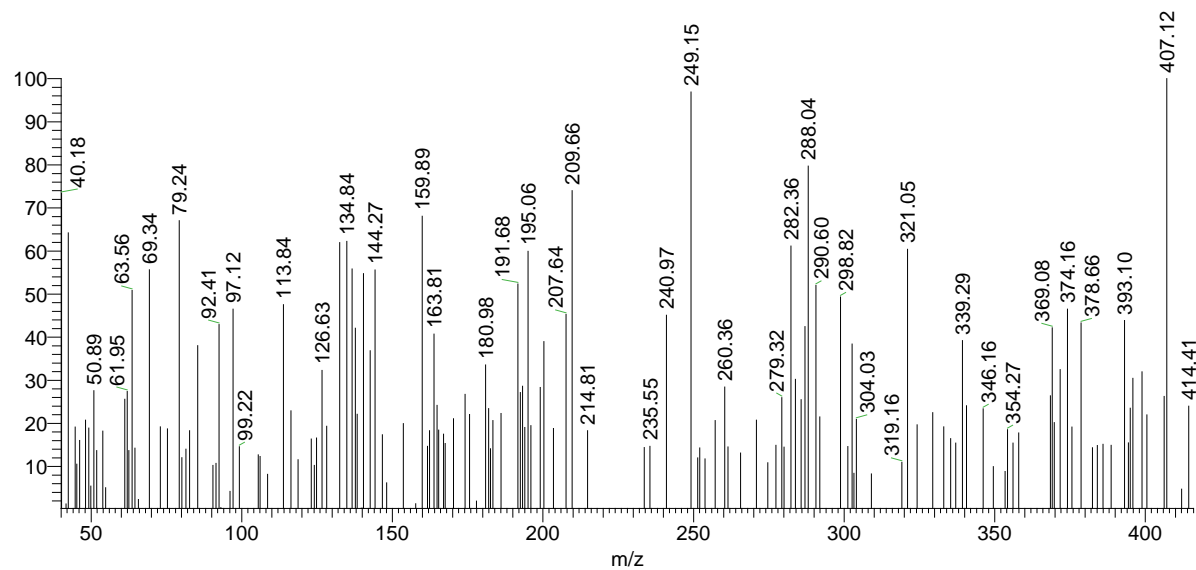

Fig.4. Mass spectra of compound 6a

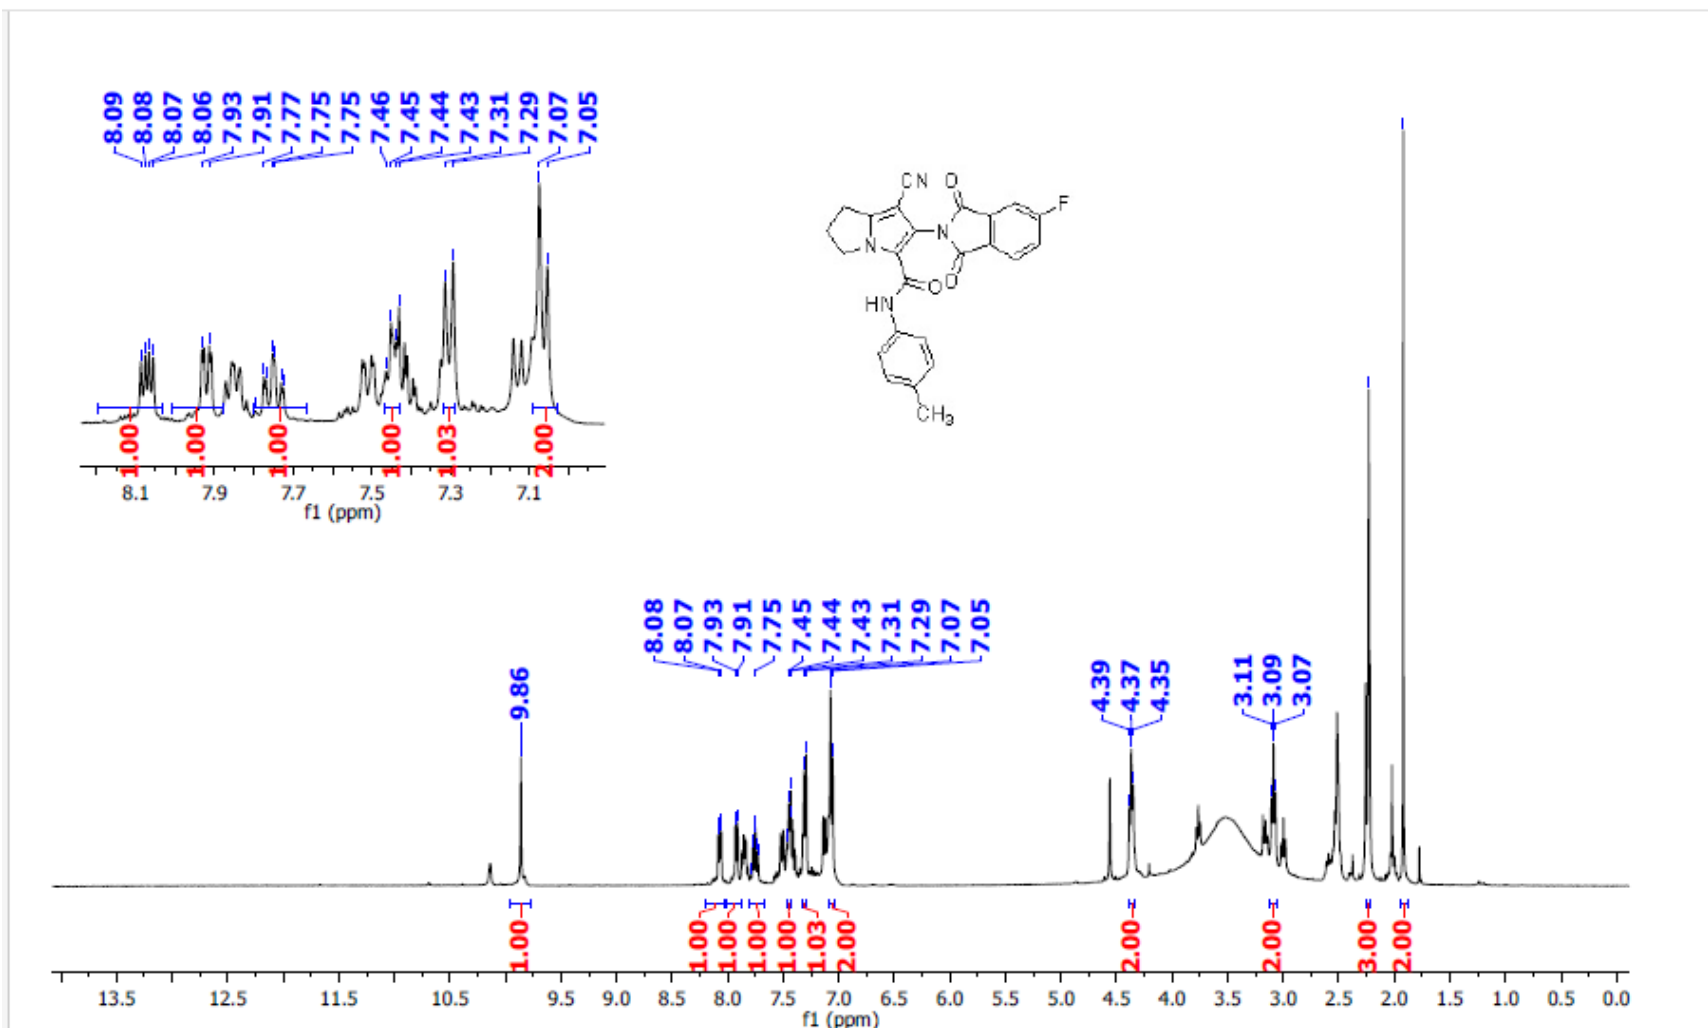

Fig.5. <sup>1</sup>H NMR of compound 6b (400 MHz, DMSO-*d*<sub>6</sub>)

RT: 3.60 - 4.12 SM: 15B

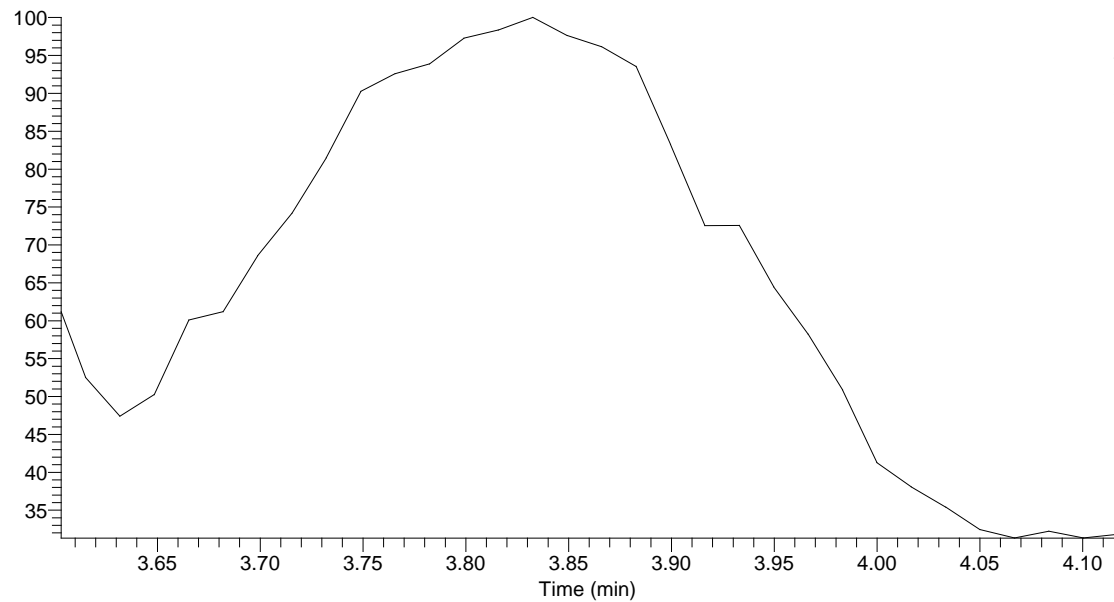

Amr-Lotfy-4E #215-217 RT: 3.62-3.65 AV: 3 SB: 6 2.80, 2.48-2.54 NL: 1.14E2  
T: + c EI Full ms [40.00-1000.00]

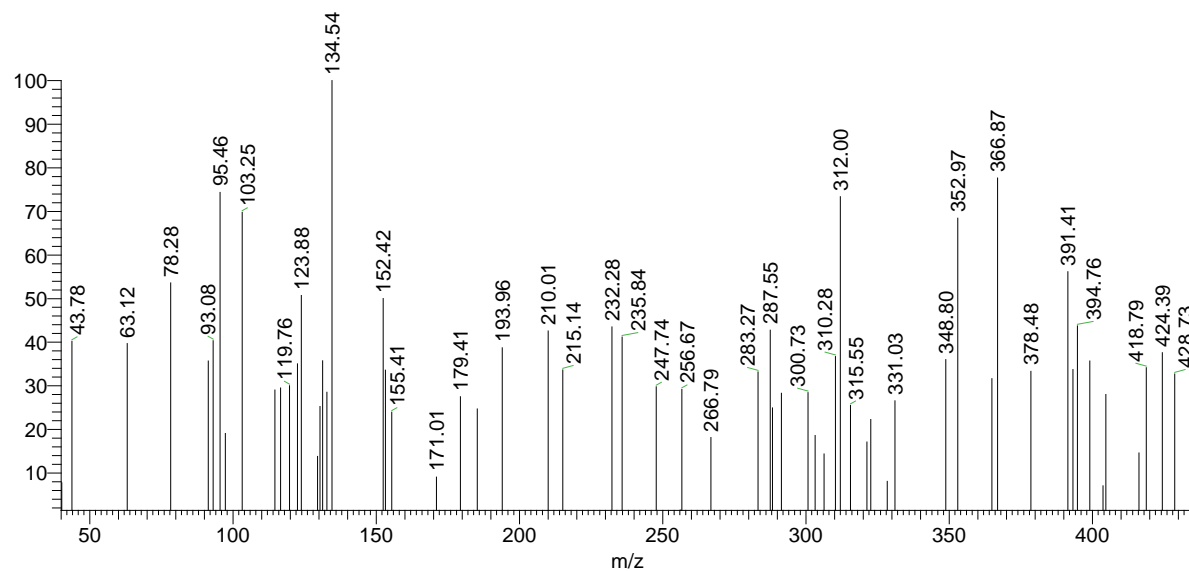

Fig.6. Mass spectra of compound 6b



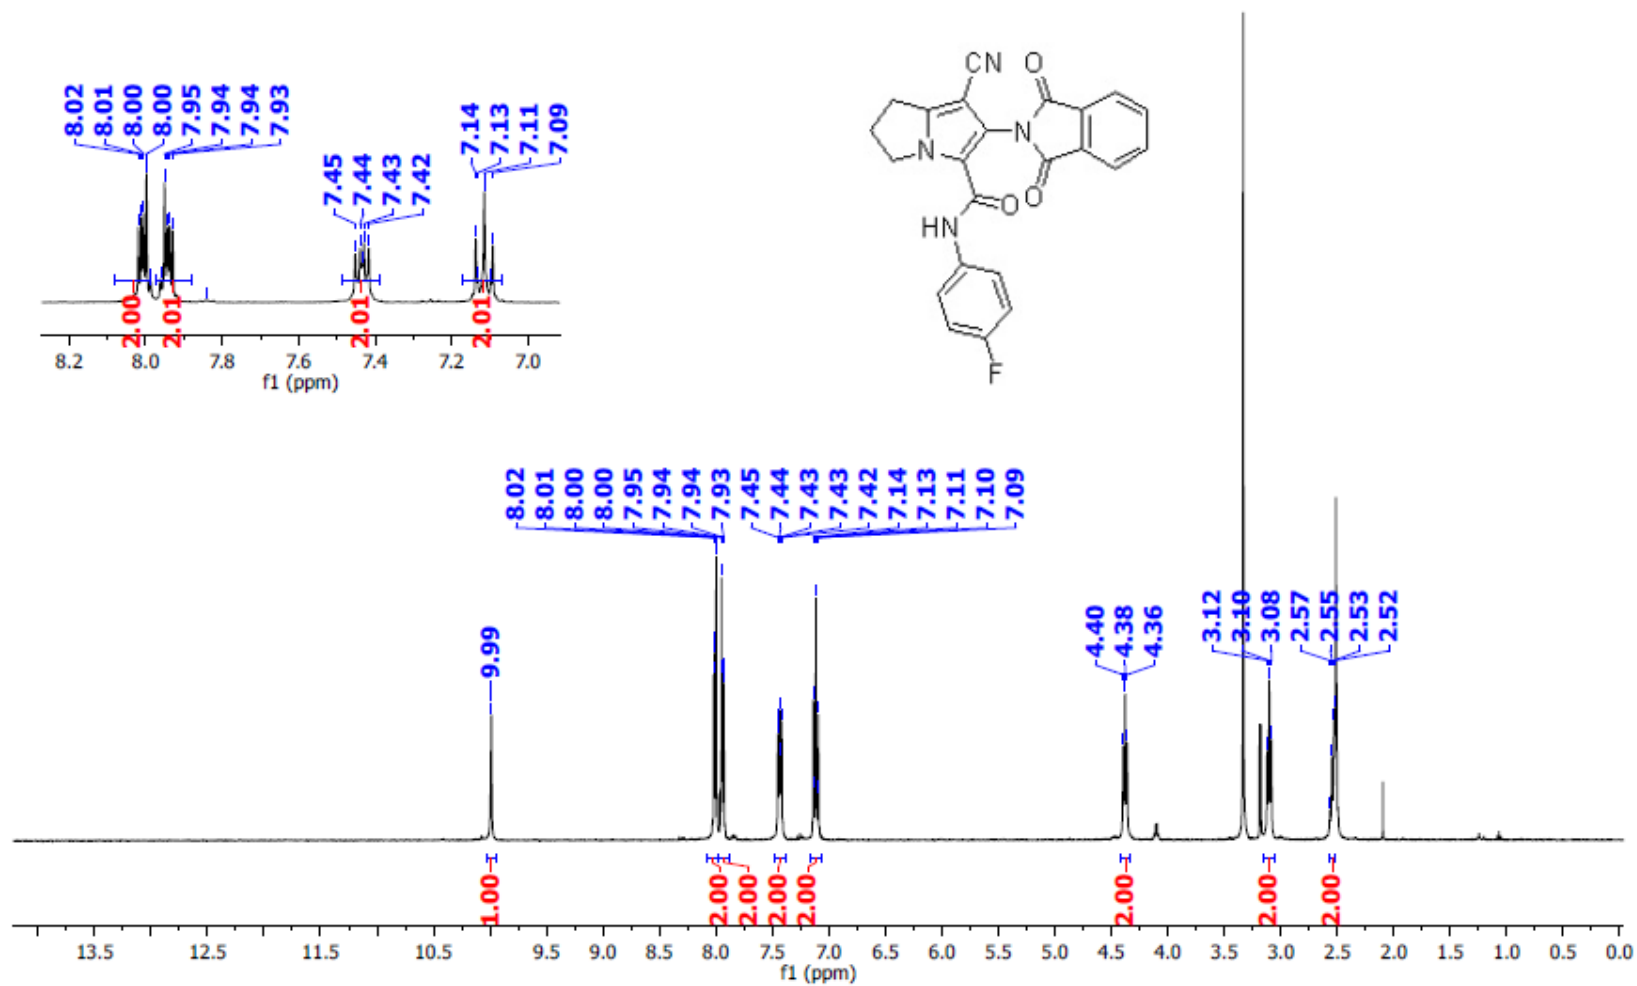

Fig.7. <sup>1</sup>H NMR of compound 6c (400 MHz, DMSO-*d*<sub>6</sub>)

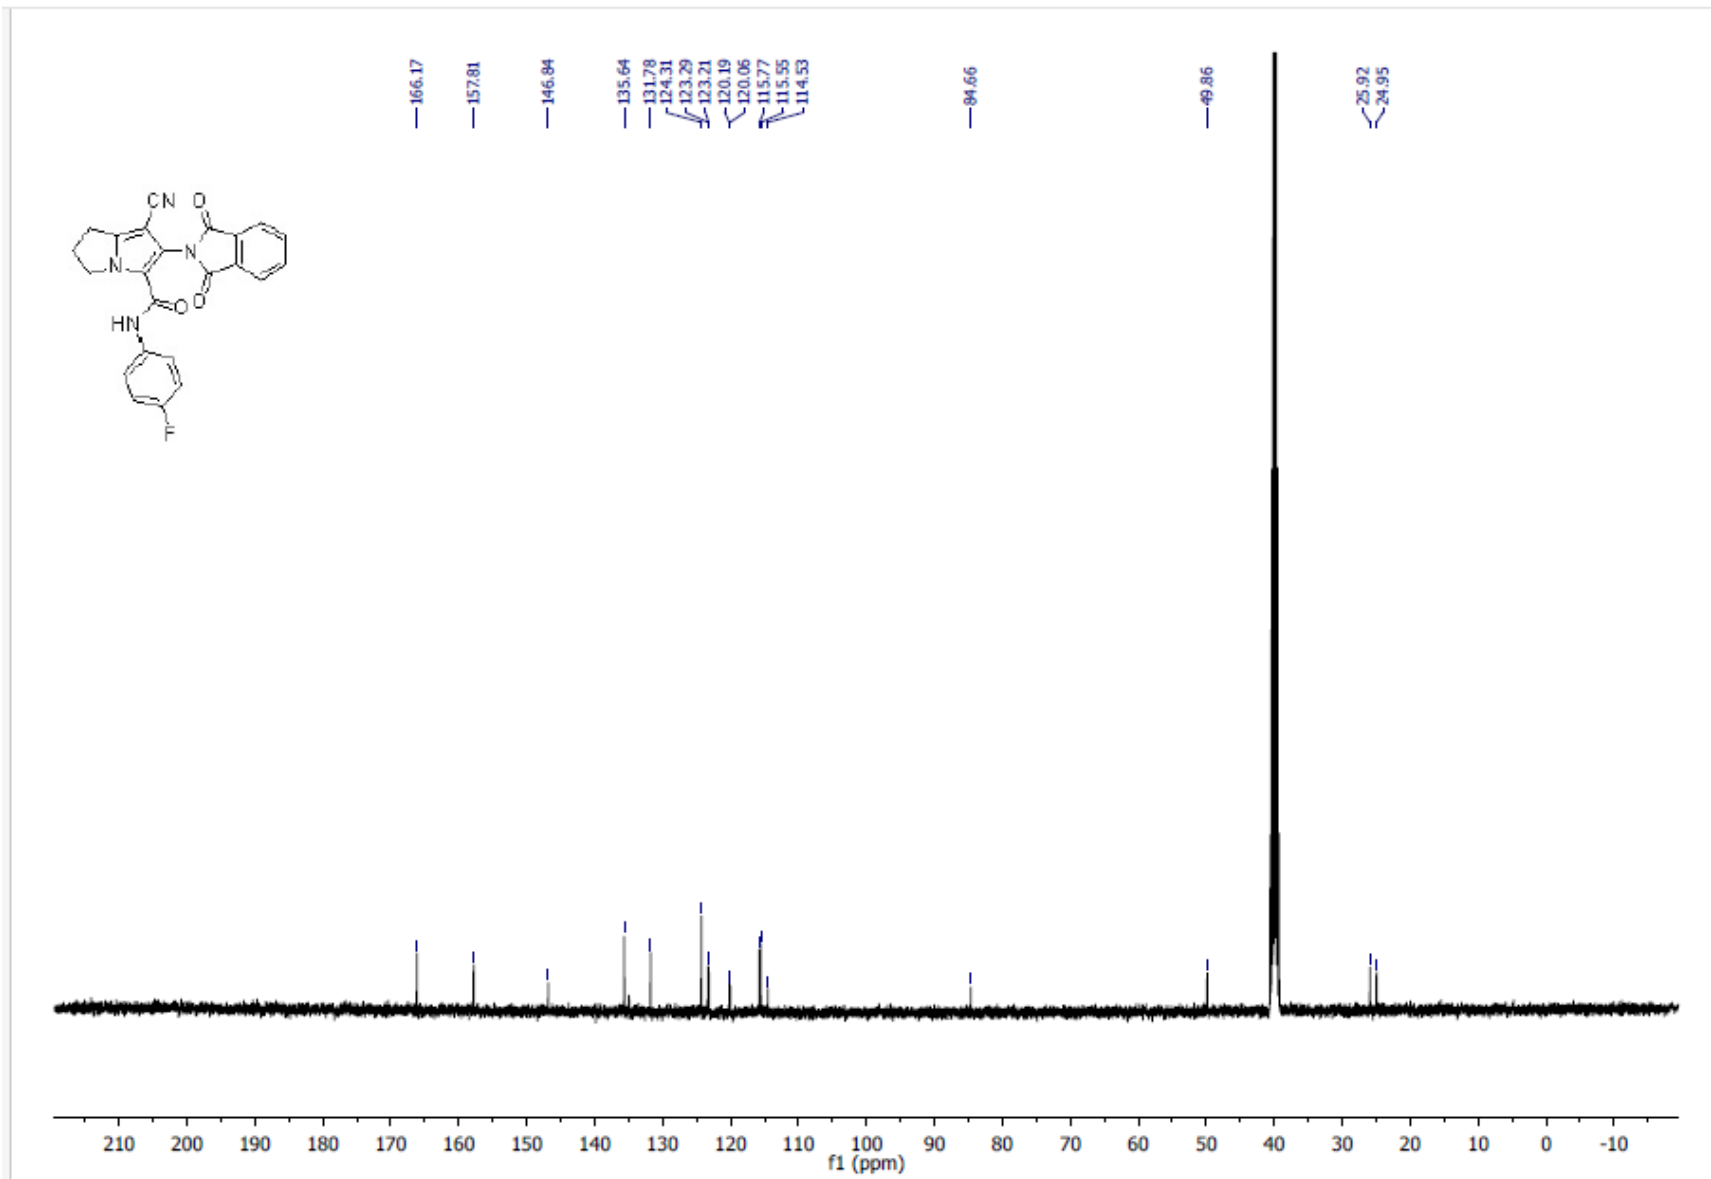

Fig.8. <sup>13</sup>C NMR of compound 6c (100 MHz, DMSO-*d*<sub>6</sub>)

RT: 4.20 - 4.35 SM: 15B

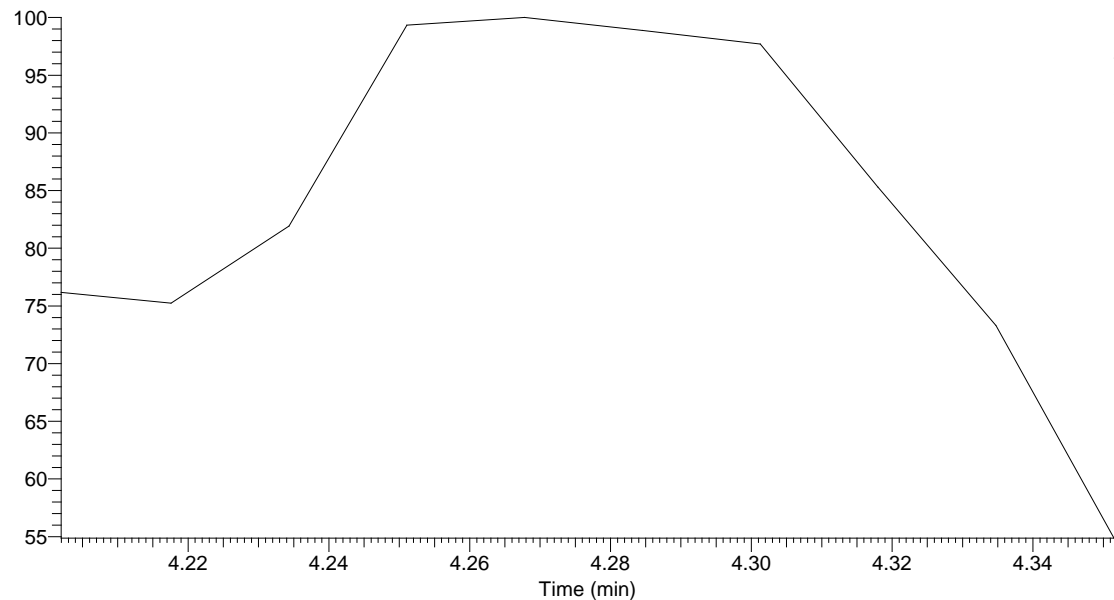

Amr-Lotfy-4A #133-136 RT: 2.24-2.29 AV: 4 SB: 6 2.80, 2.48-2.54 NL: 8.96E1  
T: + c EI Full ms [40.00-1000.00]

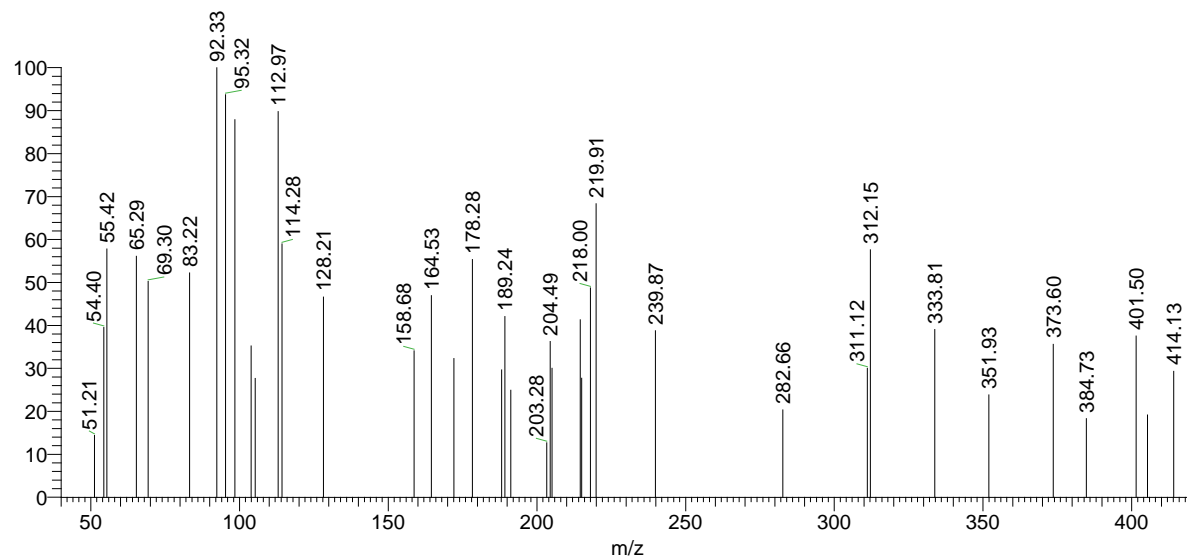

Fig.9. Mass spectra of compound 6c

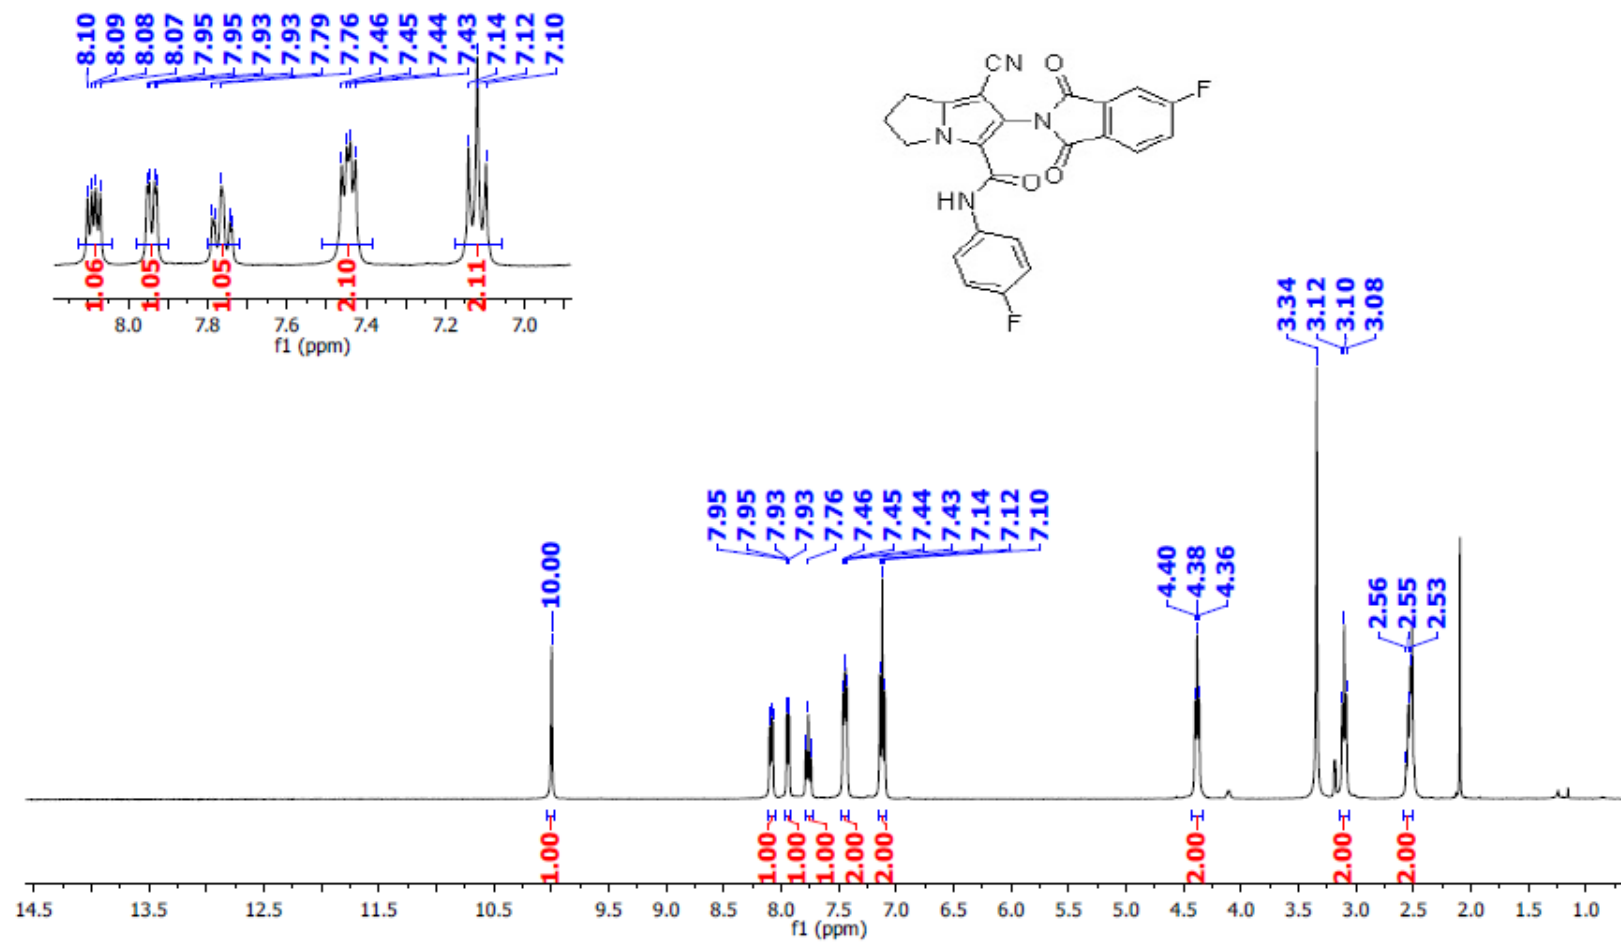

Fig.10. <sup>1</sup>H NMR of compound 6d (400 MHz, DMSO-*d*<sub>6</sub>)

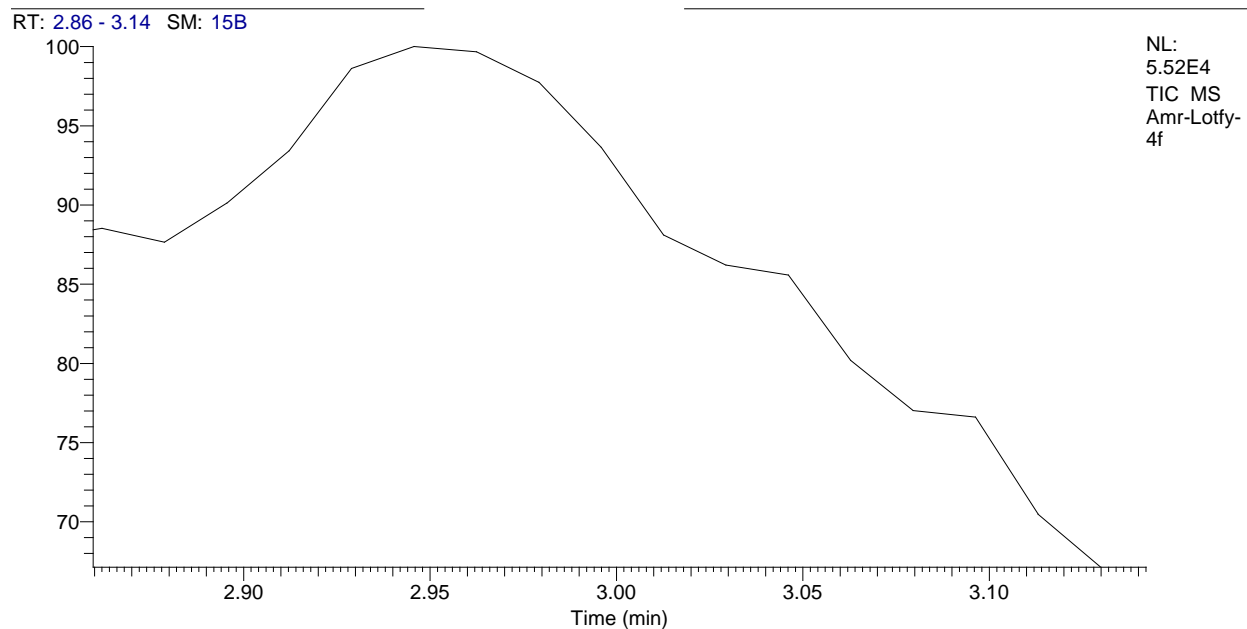

Amr-Lotfy-4f #157 RT: 2.64 AV: 1 SB: 6 2.80 , 2.48-2.54 NL: 1.58E3  
T: + c EI Full ms [40.00-1000.00]

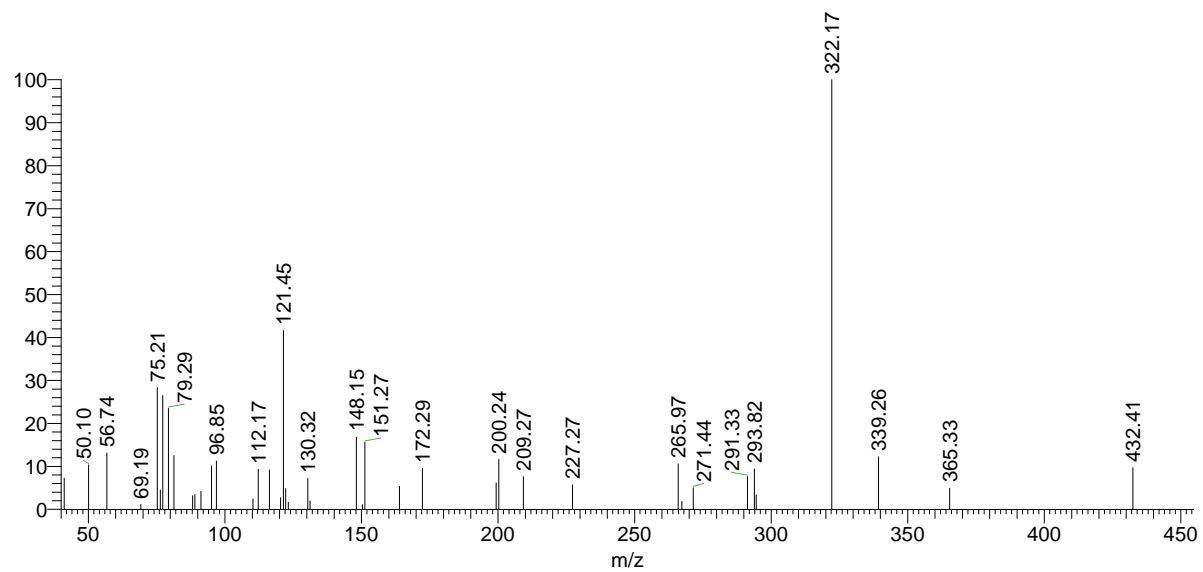

Fig.11. Mass spectra of compound 6d

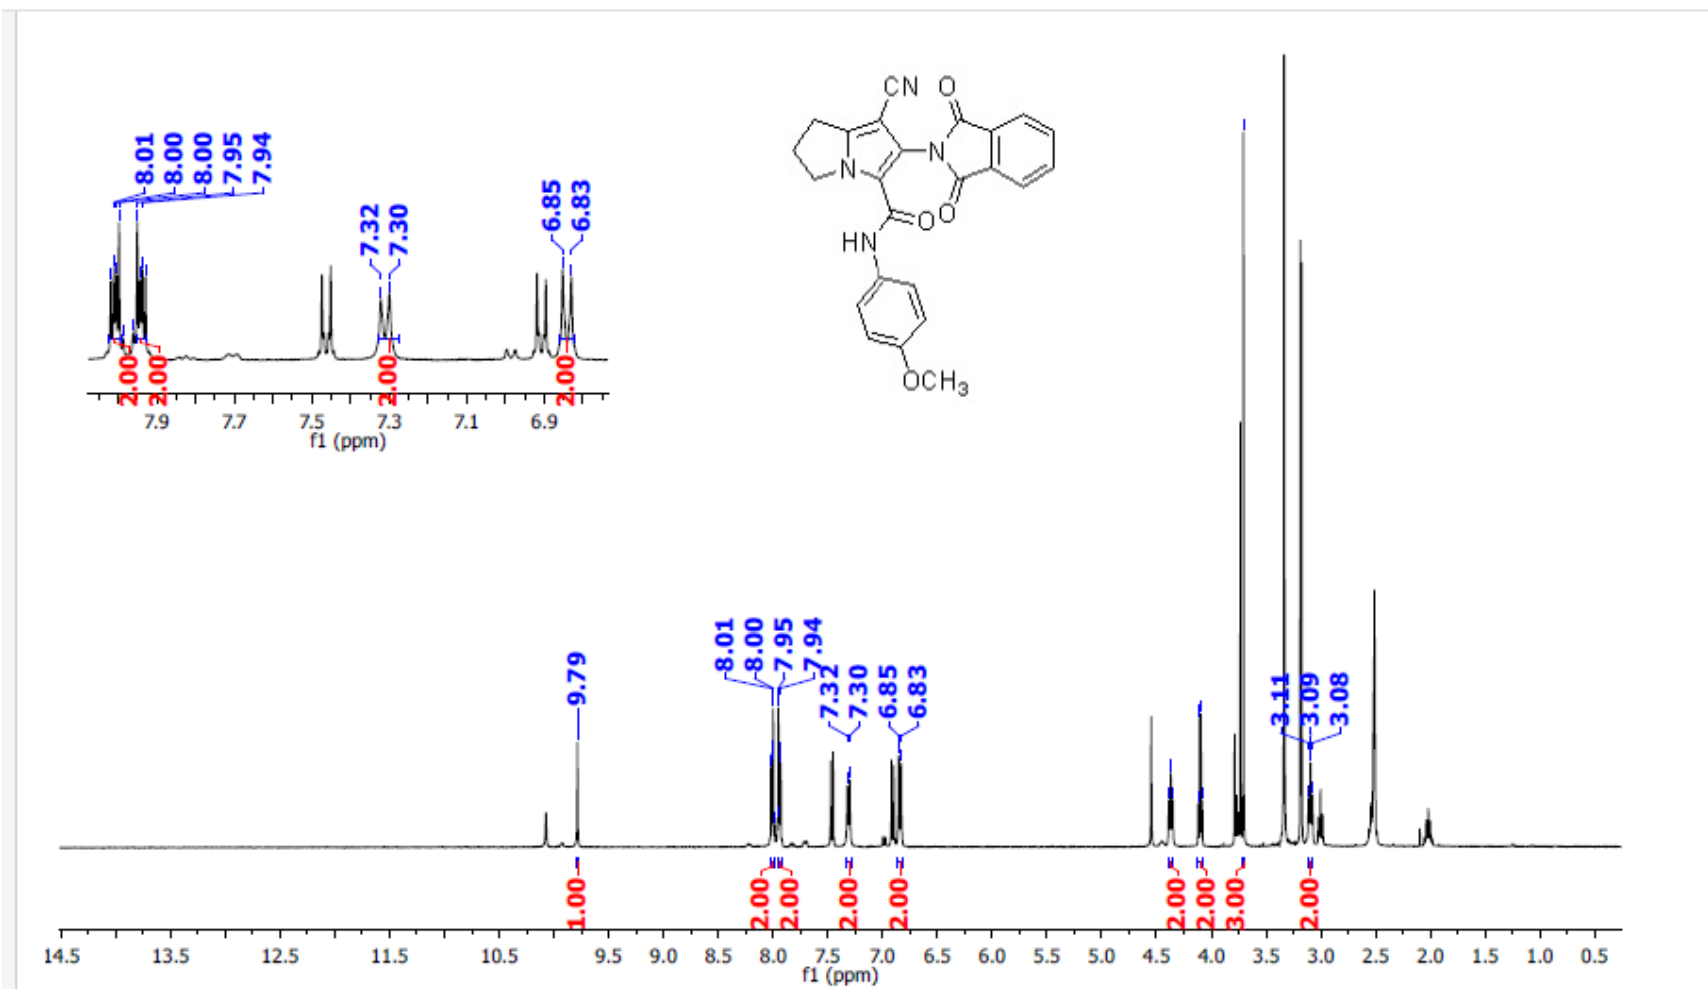

Fig.12. <sup>1</sup>H NMR of compound 6e (400 MHz, DMSO-*d*<sub>6</sub>)

RT: 1.04 - 1.47 SM: 15B

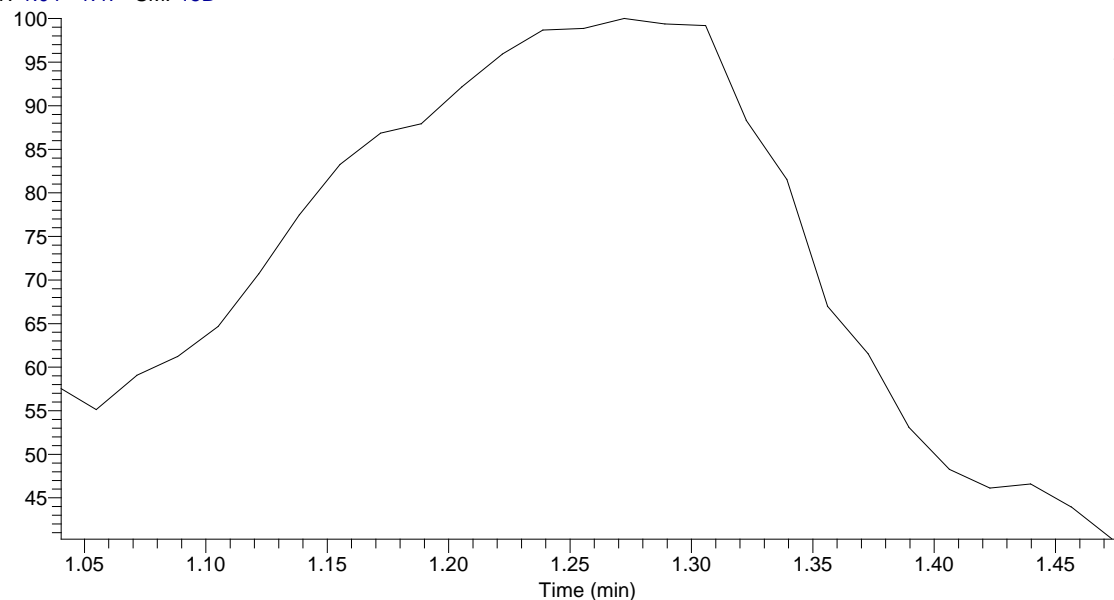

NL:  
8.90E3  
TIC MS  
Amr-Lofly-  
4B

Amr-Lofly-4B #72 RT: 1.22 AV: 1 SB: 6 2.80 , 2.48-2.54 NL: 2.66E2  
T: + c EI Full ms [40.00-1000.00]

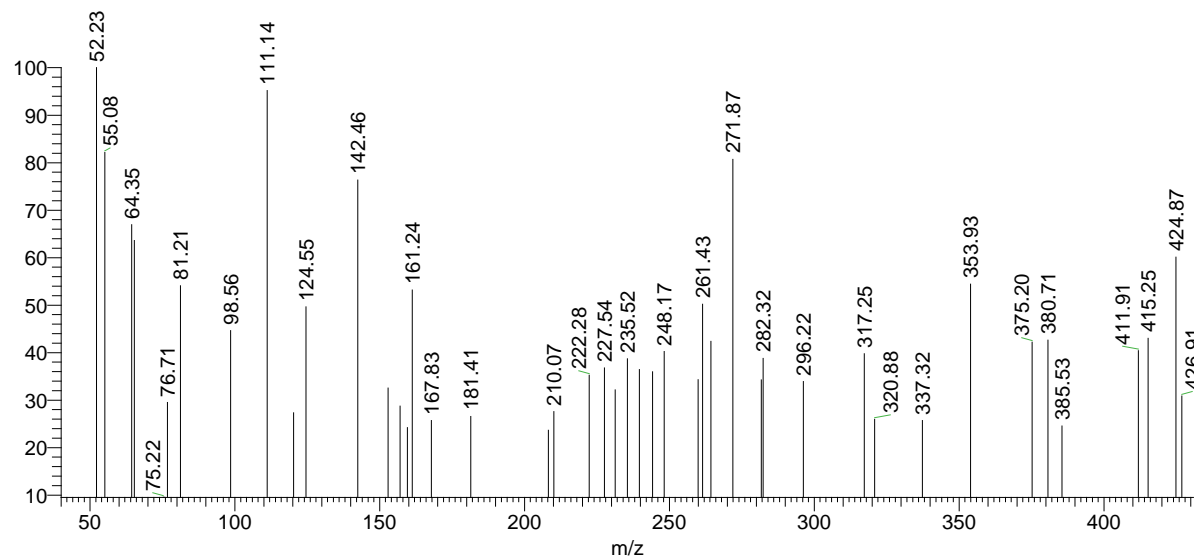

Fig.13. Mass spectra of compound 6e

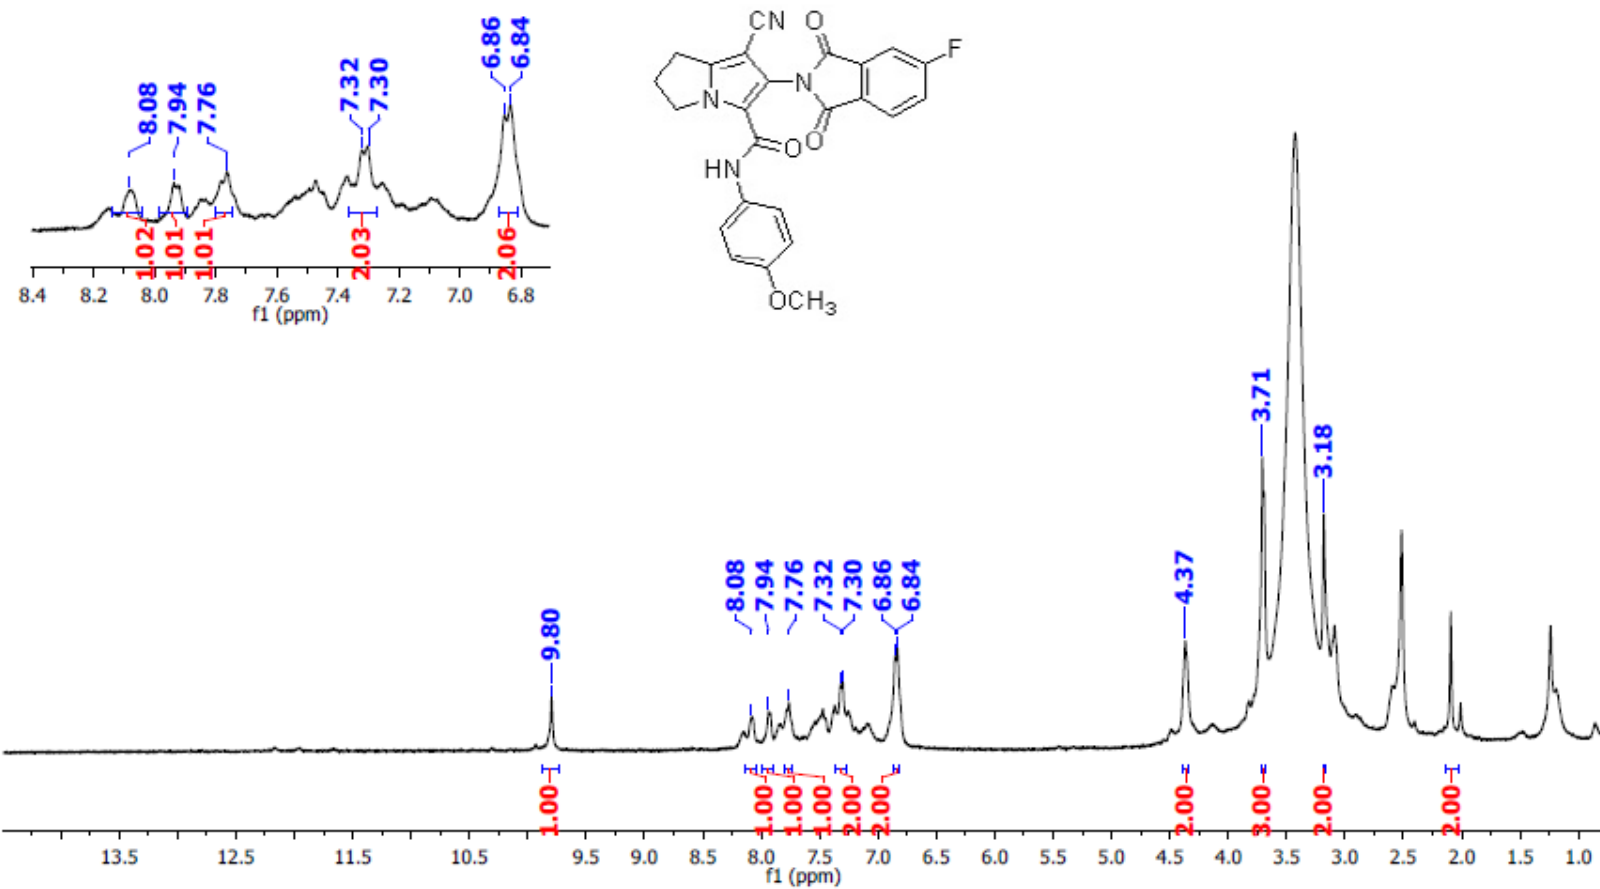

Fig.14. <sup>1</sup>H NMR of compound 6f (400 MHz, DMSO-d<sub>6</sub>)



RT: 1.81 - 2.63 SM: 15B

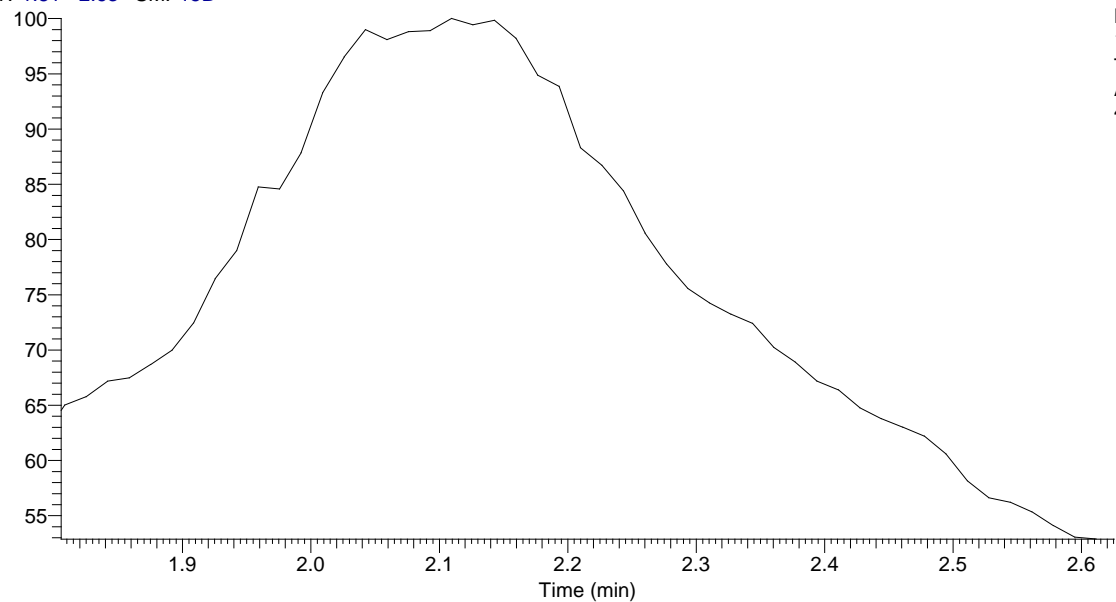

NL:  
1.15E5  
TIC MS  
Amr-Lotfy-  
4g

Amr-Lotfy-4g #178 RT: 3.00 AV: 1 SB: 6 2.80 , 2.48-2.54 NL: 6.53E2  
T: + c EI Full ms [40.00-1000.00]

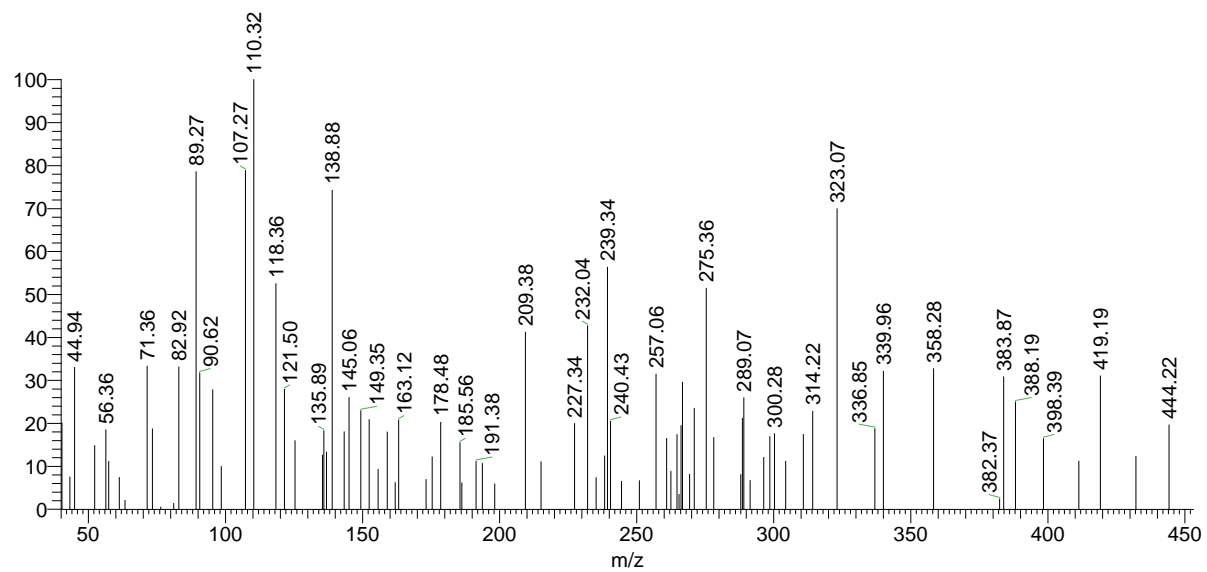

Fig.15. Mass spectra of compound 6f

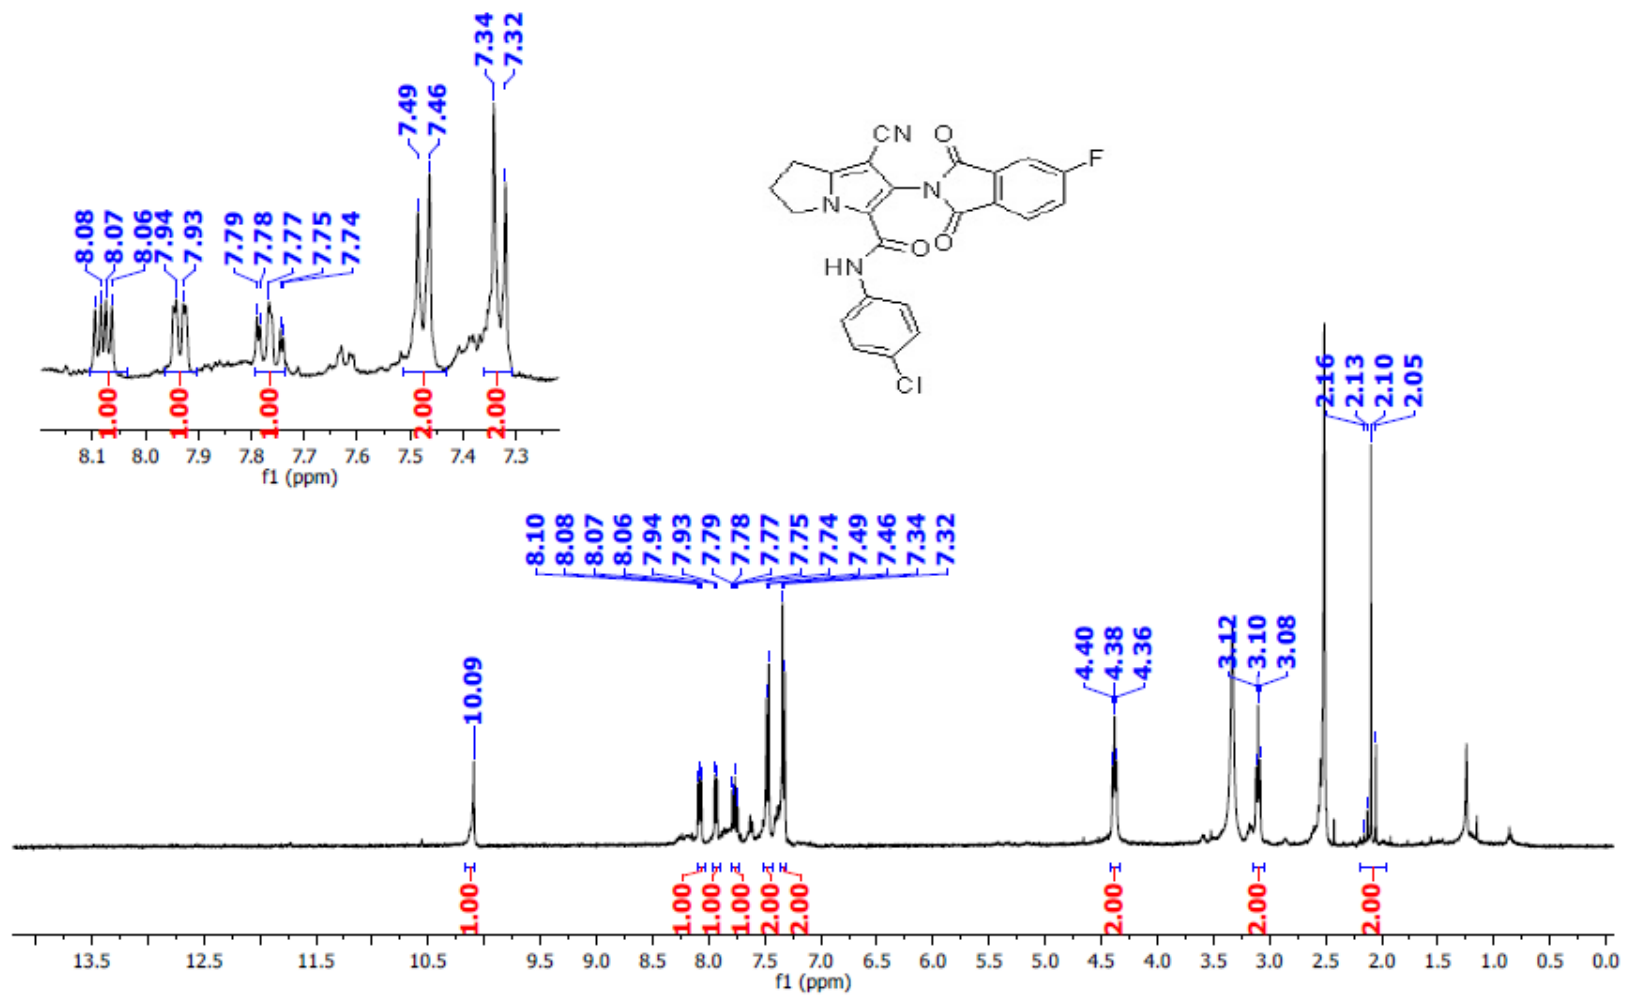

Fig.16.  $^1\text{H}$  NMR of compound 6g (400 MHz,  $\text{DMSO-}d_6$ )

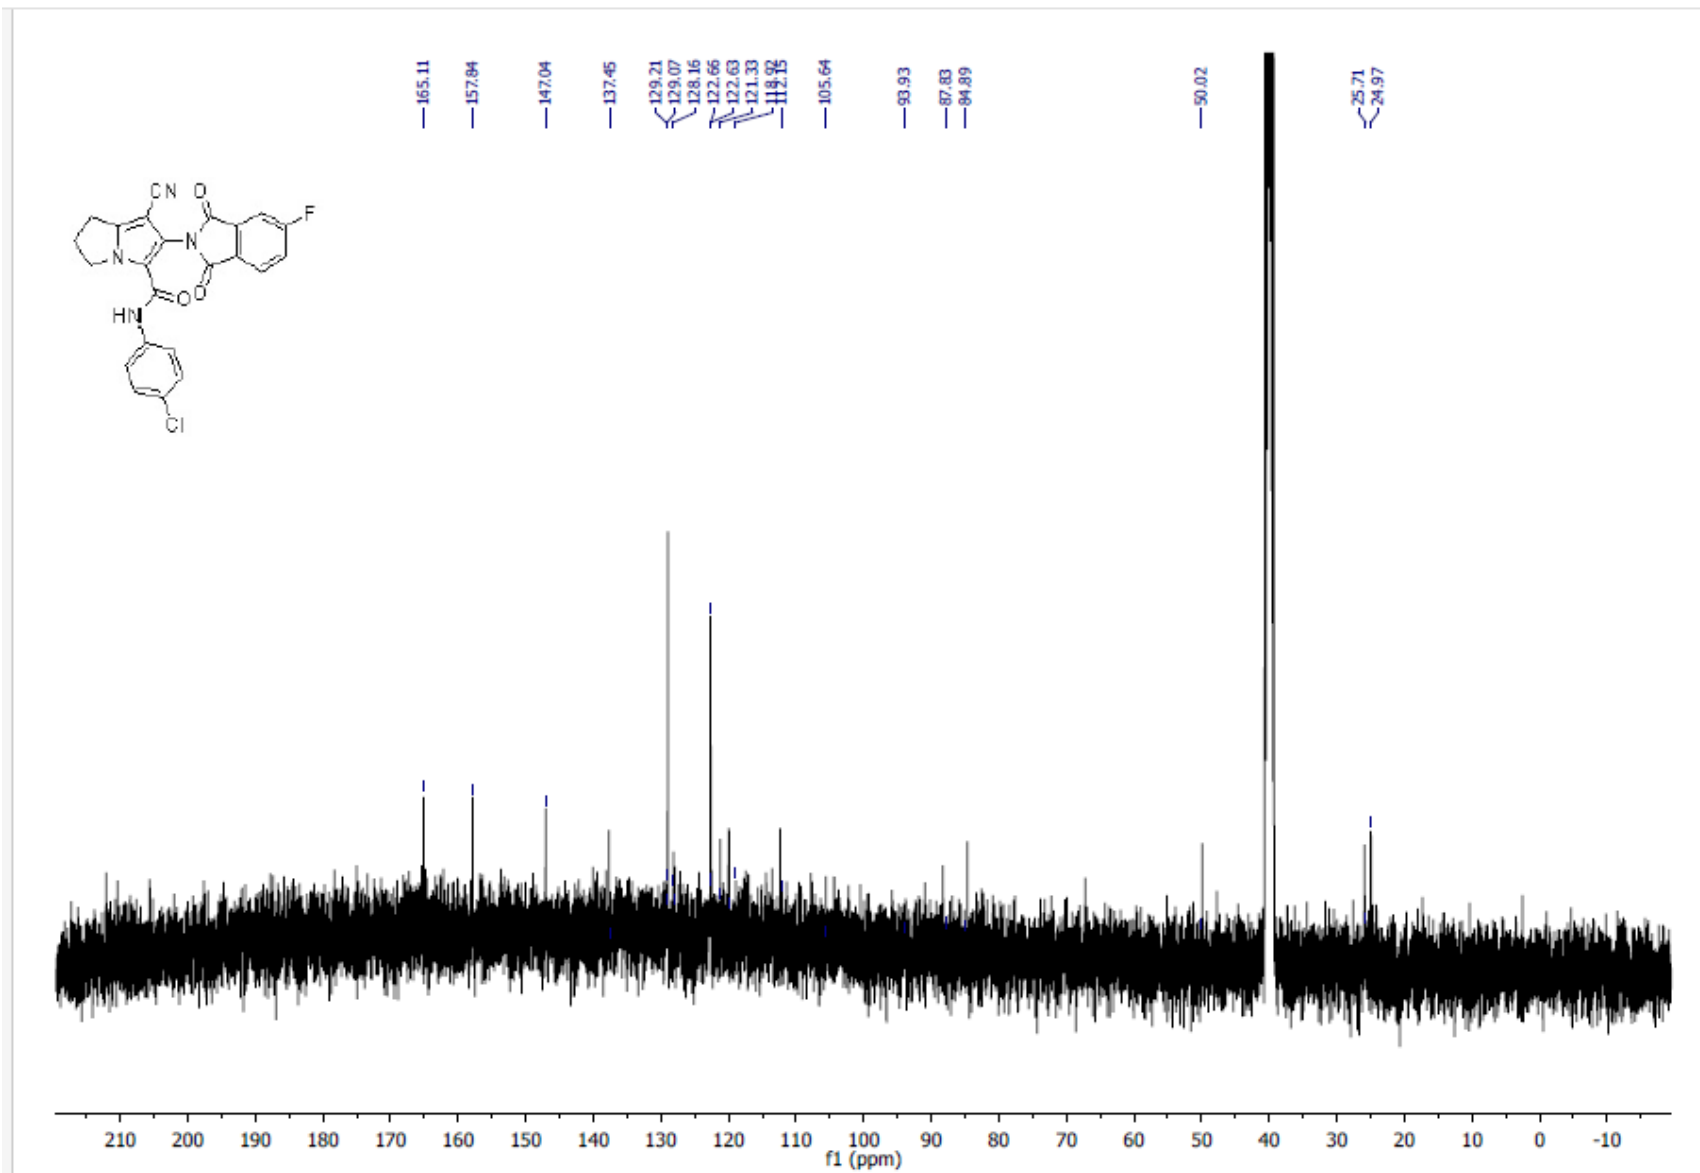

Fig.17.  $^{13}\text{C}$  NMR of compound 6g (100 MHz,  $\text{DMSO-}d_6$ )

RT: 3.30 - 3.67 SM: 15B

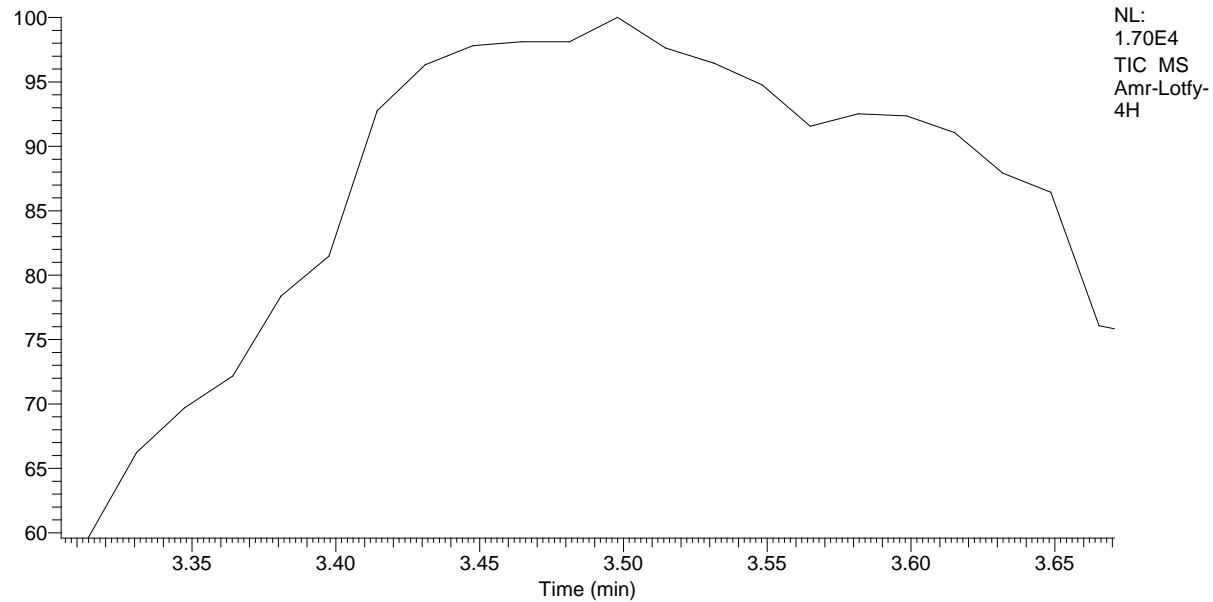

Amr-Lotfy-4H #281-283 RT: 4.72-4.75 AV: 3 SB: 6 2.80 , 2.48-2.54 NL: 1.72E2  
T: + c EI Full ms [40.00-1000.00]

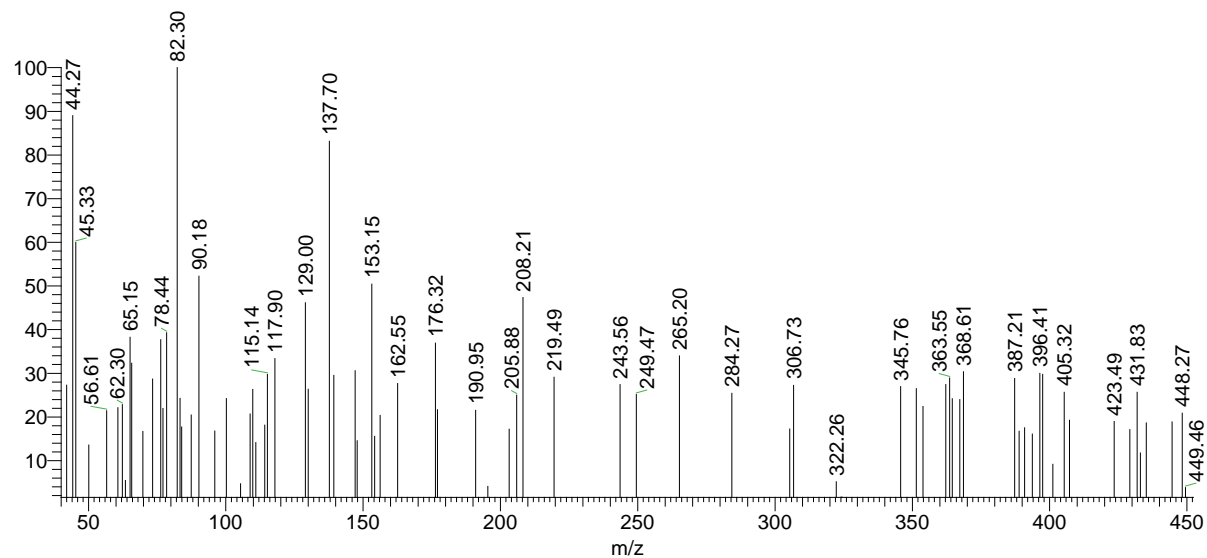

Fig.18. Mass spectra of compound 6g

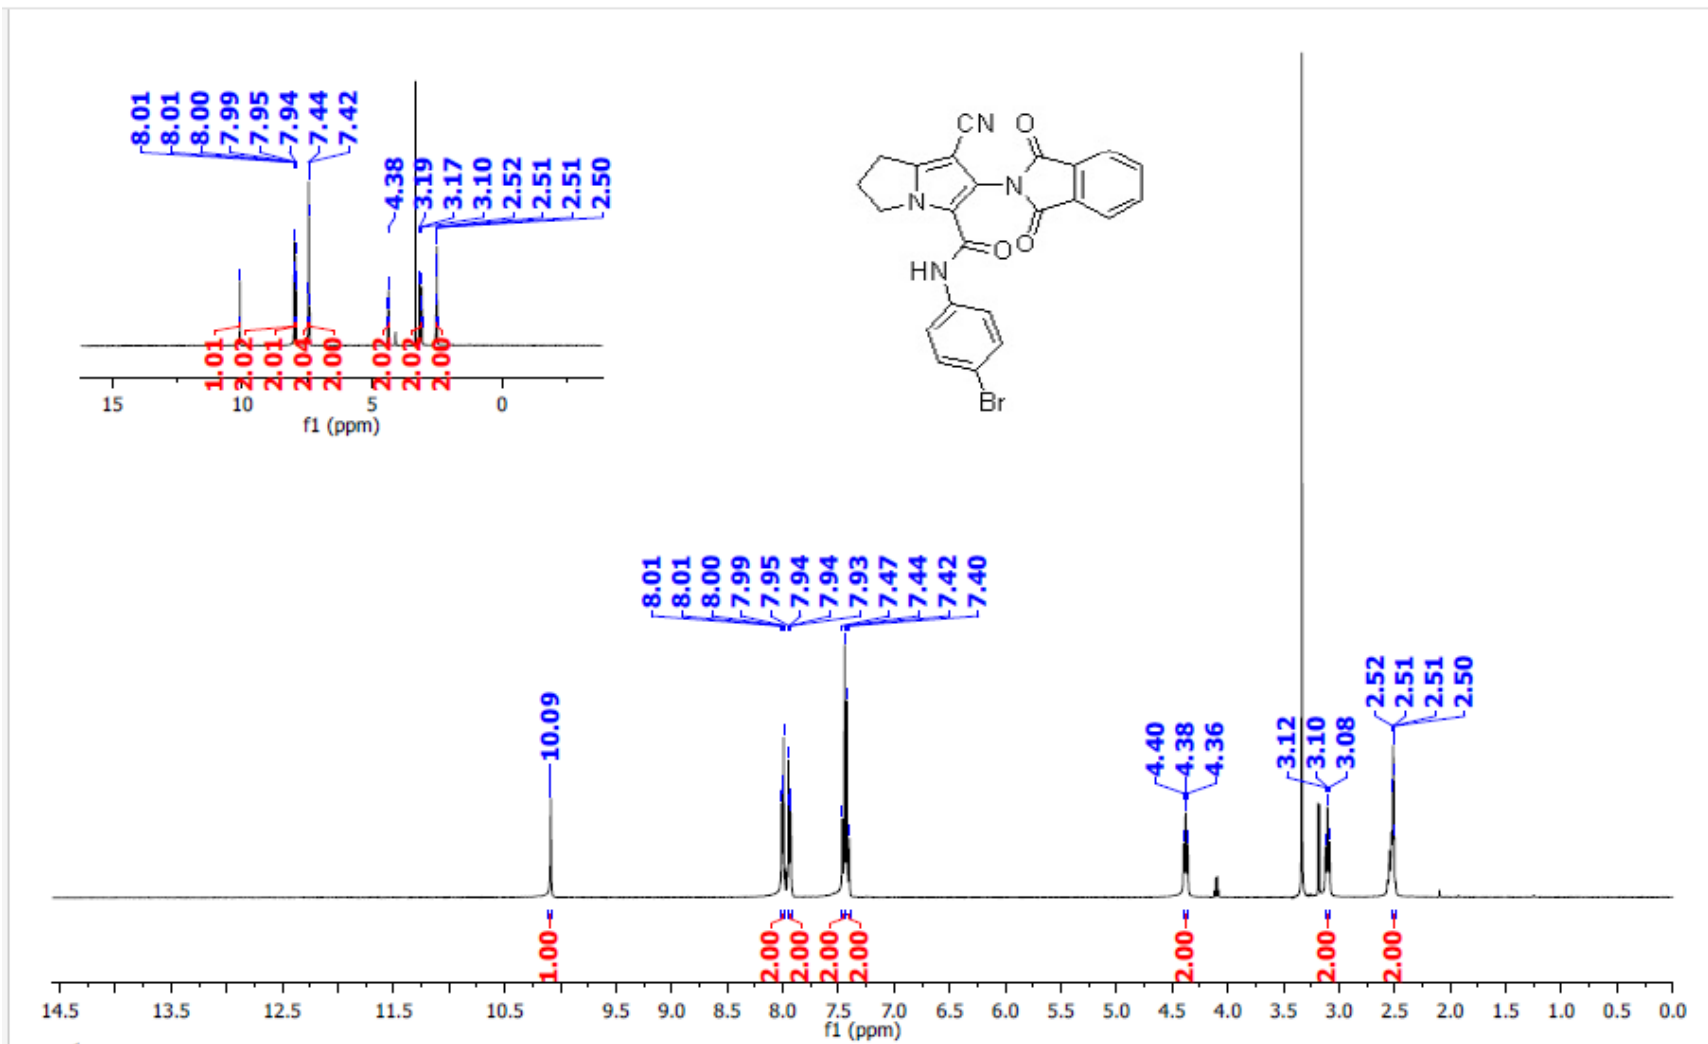

Fig.19. <sup>1</sup>H NMR of compound 6h (400 MHz, DMSO-*d*<sub>6</sub>)

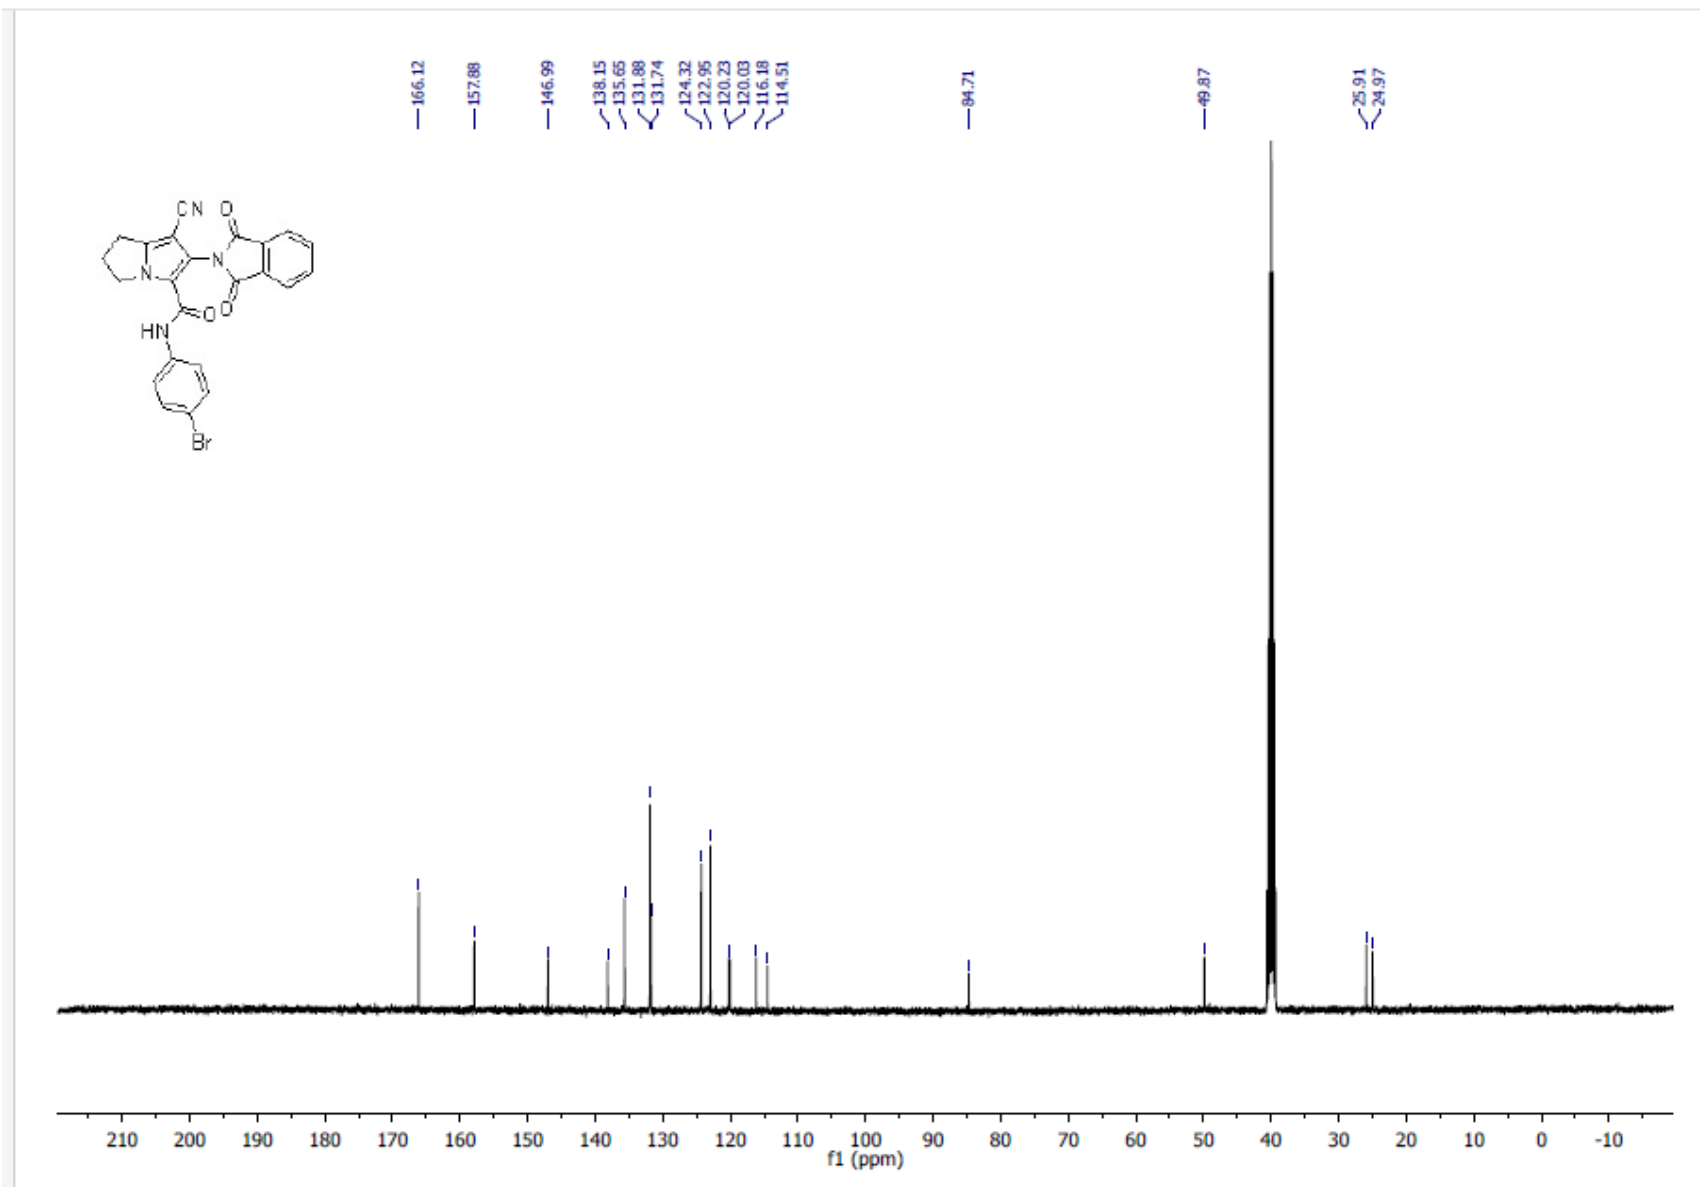

Fig.20.  $^{13}\text{C}$  NMR of compound 6h (100 MHz,  $\text{DMSO-}d_6$ )

RT: 3.29 - 3.59 SM: 15B

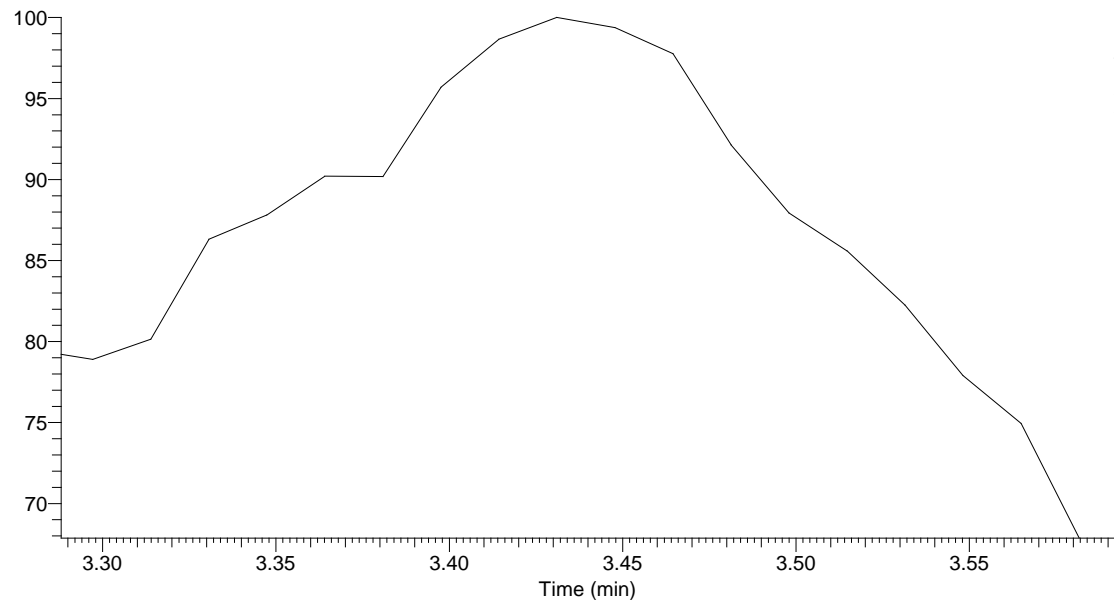

NL:  
2.66E4  
TIC MS  
Amr-Lotfy-  
4c

Amr-Lotfy-4c #165-168 RT: 2.78-2.83 AV: 4 SB: 6 2.80, 2.48-2.54 NL: 1.29E2  
T: + c EI Full ms [40.00-1000.00]

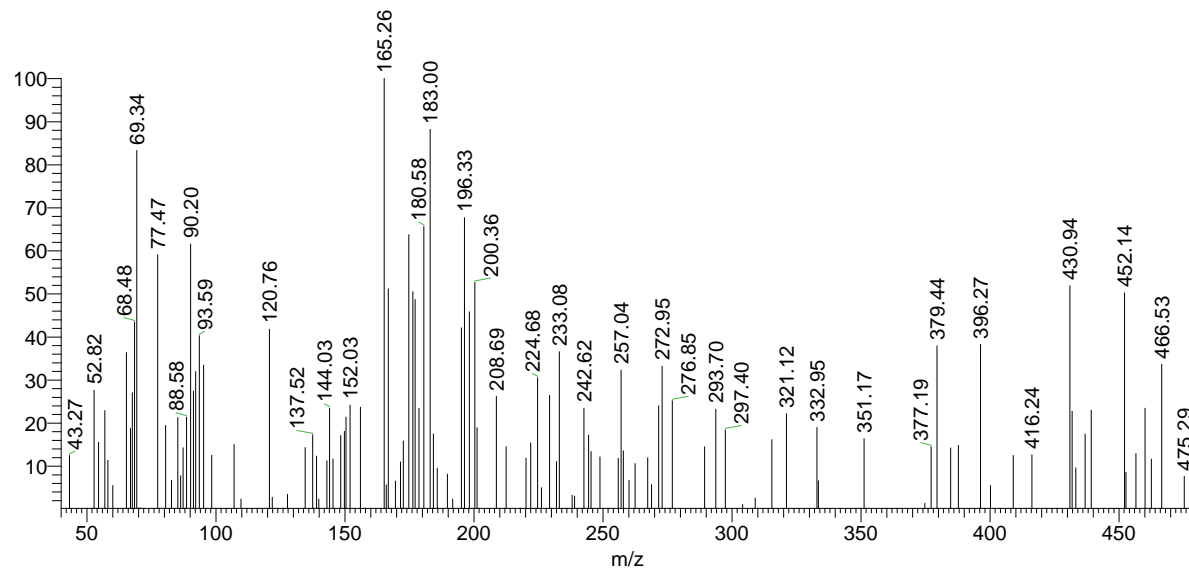

Fig.21. Mass spectra of compound 6h

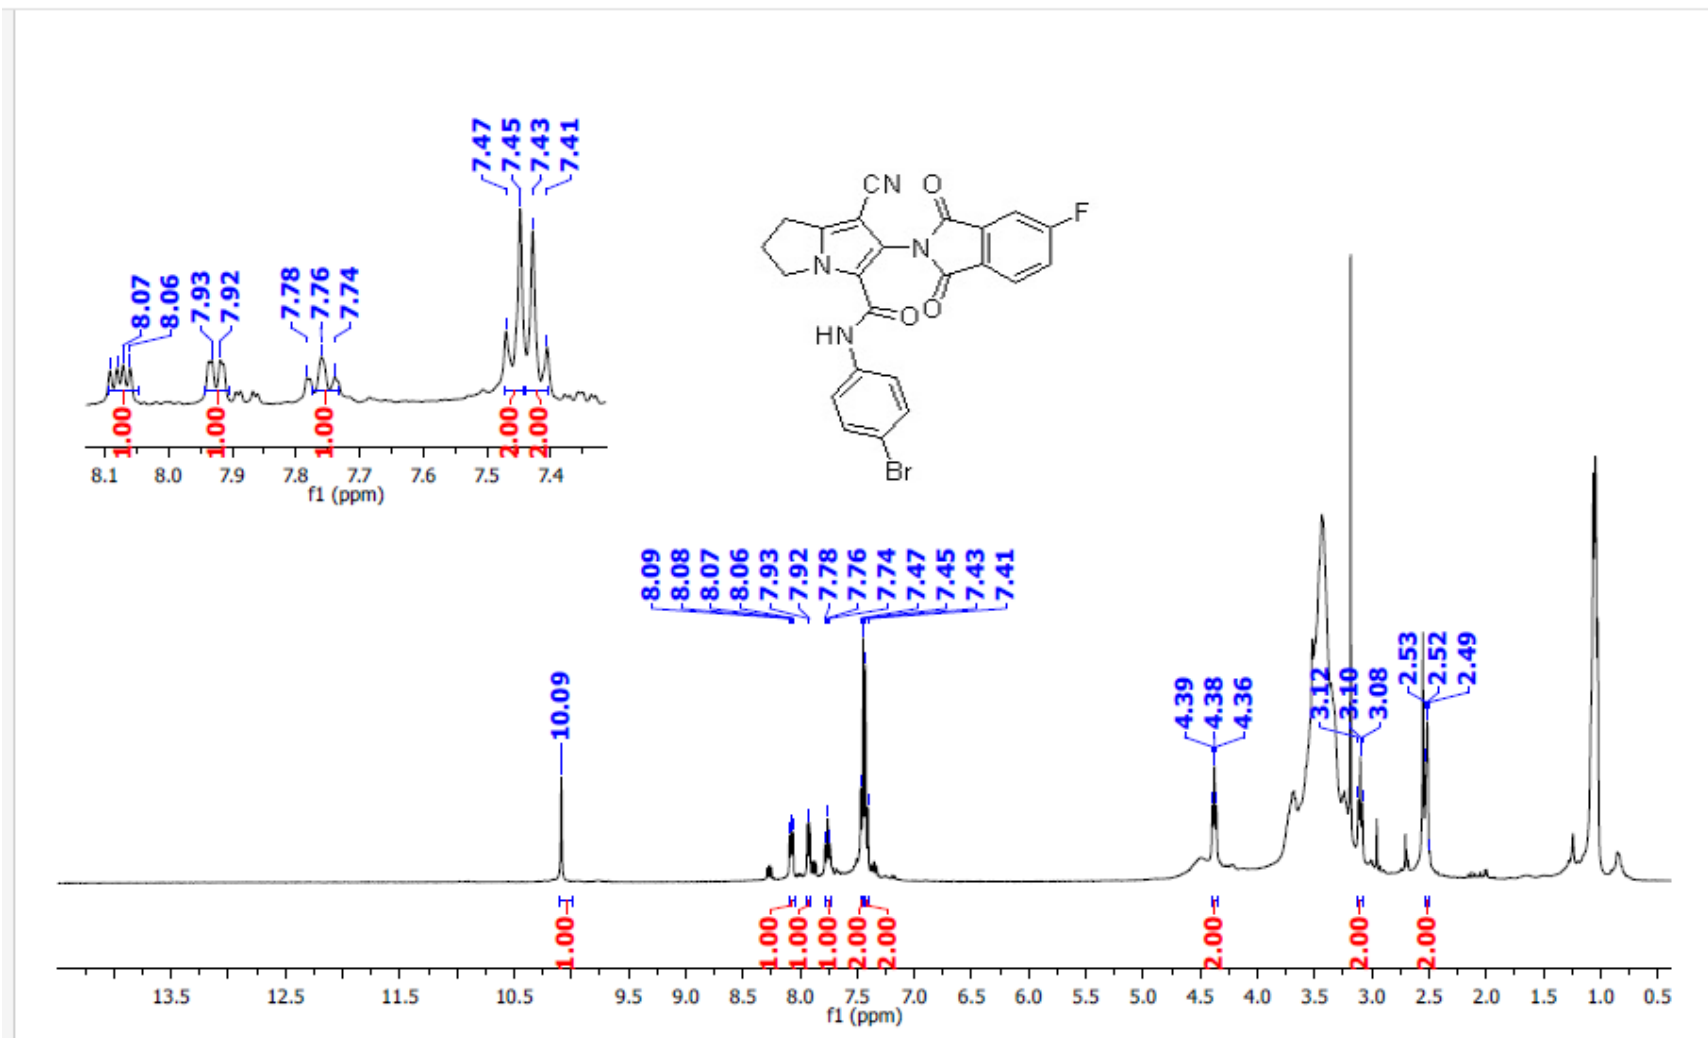

Fig.22. <sup>1</sup>H NMR of compound 6i (400 MHz, DMSO-*d*<sub>6</sub>)



RT: 3.11 - 3.38 SM: 15B

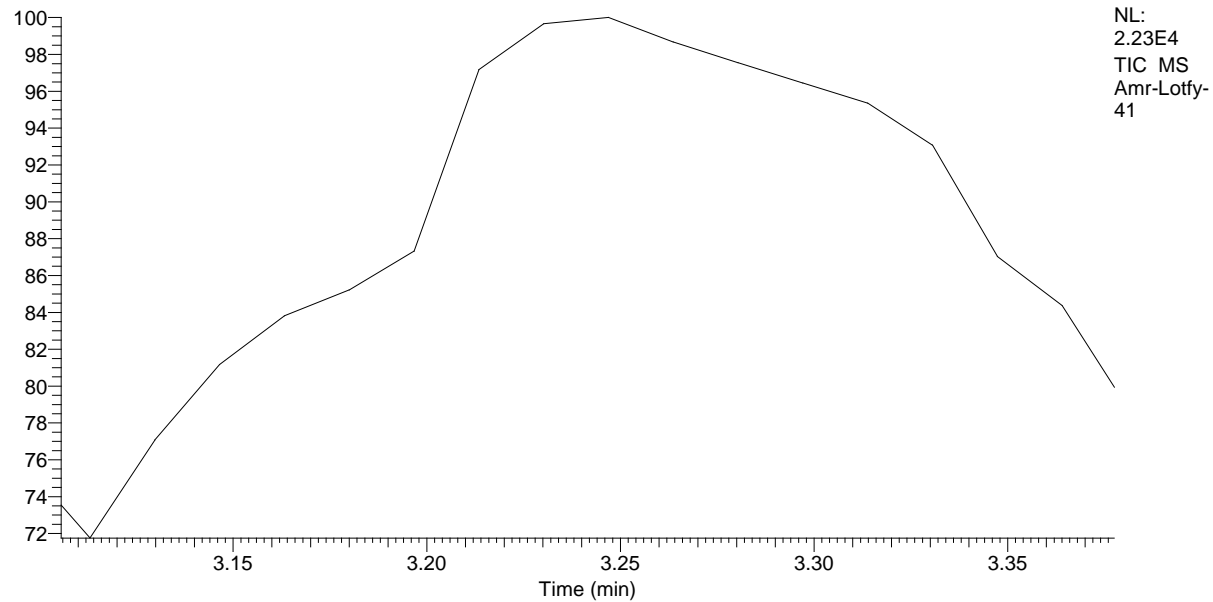

Amr-Lotfy-41 #178-180 RT: 3.00-3.03 AV: 3 SB: 6 2.80, 2.48-2.54 NL: 1.26E2  
T: + c EI Full ms [40.00-1000.00]

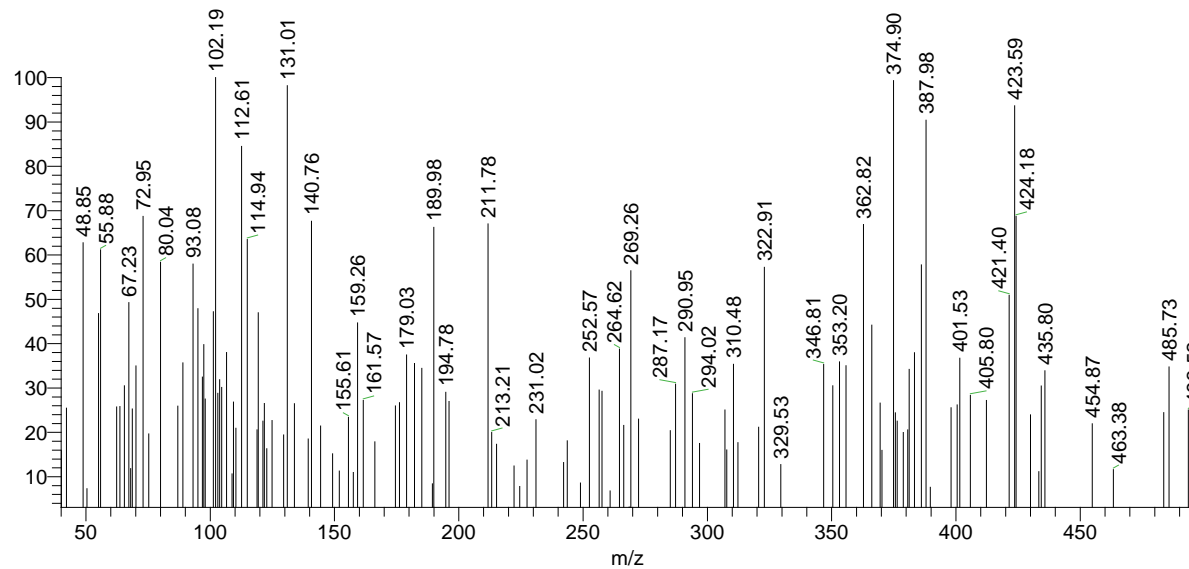

Fig.23. Mass spectra of compound 6i

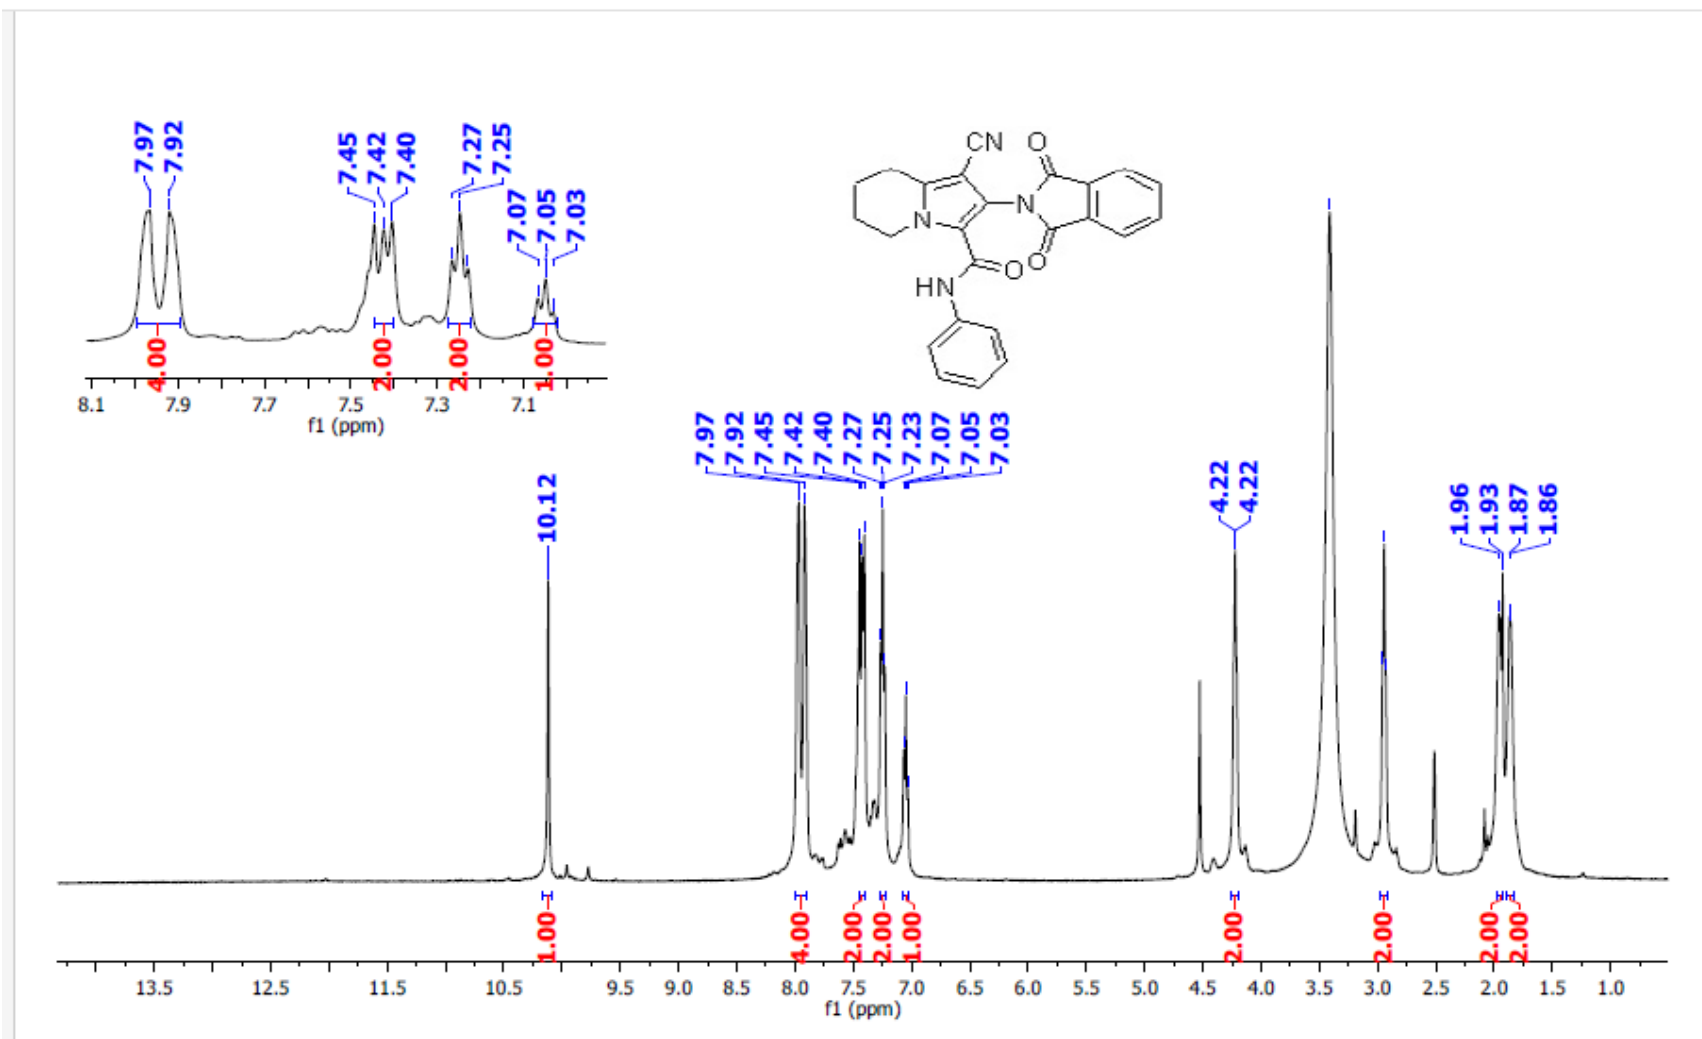

Fig.24. <sup>1</sup>H NMR of compound 6j (400 MHz, DMSO-d<sub>6</sub>)

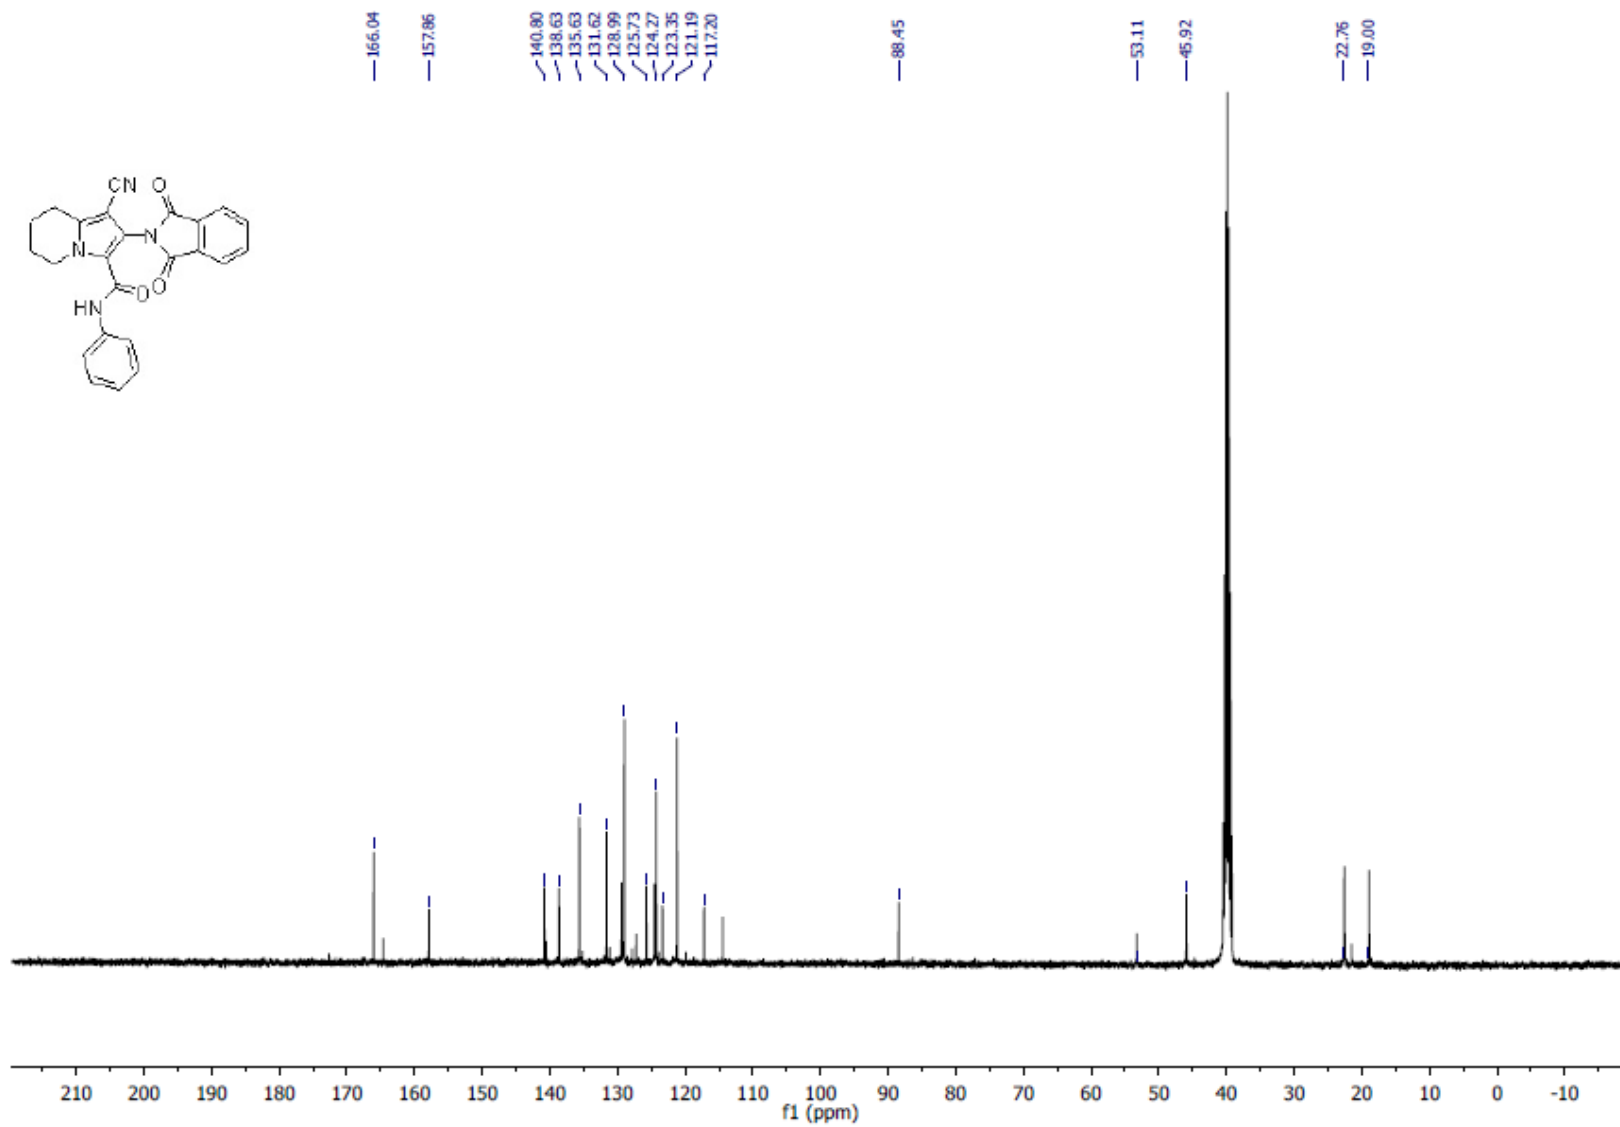

Fig.25.  $^{13}\text{C}$  NMR of compound 6j (100 MHz,  $\text{DMSO}-d_6$ )

RT: 2.30 - 2.50 SM: 15B

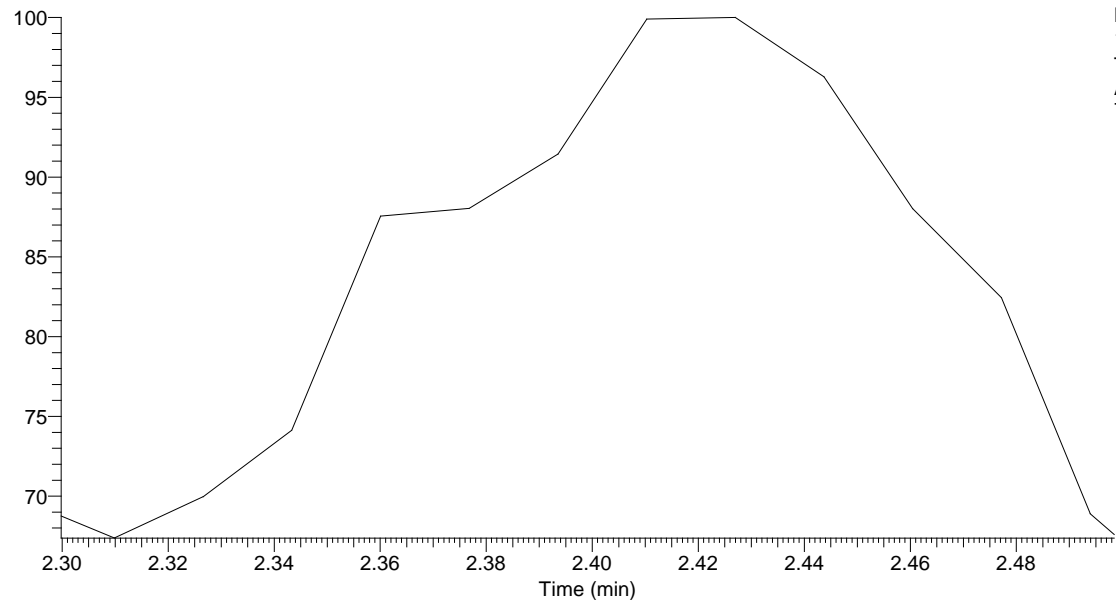

NL:  
1.64E4  
TIC MS  
Amr-Lotfy-  
7A

Amr-Lotfy-7A #44-46 RT: 0.75-0.79 AV: 3 SB: 6 2.80 , 2.48-2.54 NL: 2.06E2  
T: + c EI Full ms [40.00-1000.00]

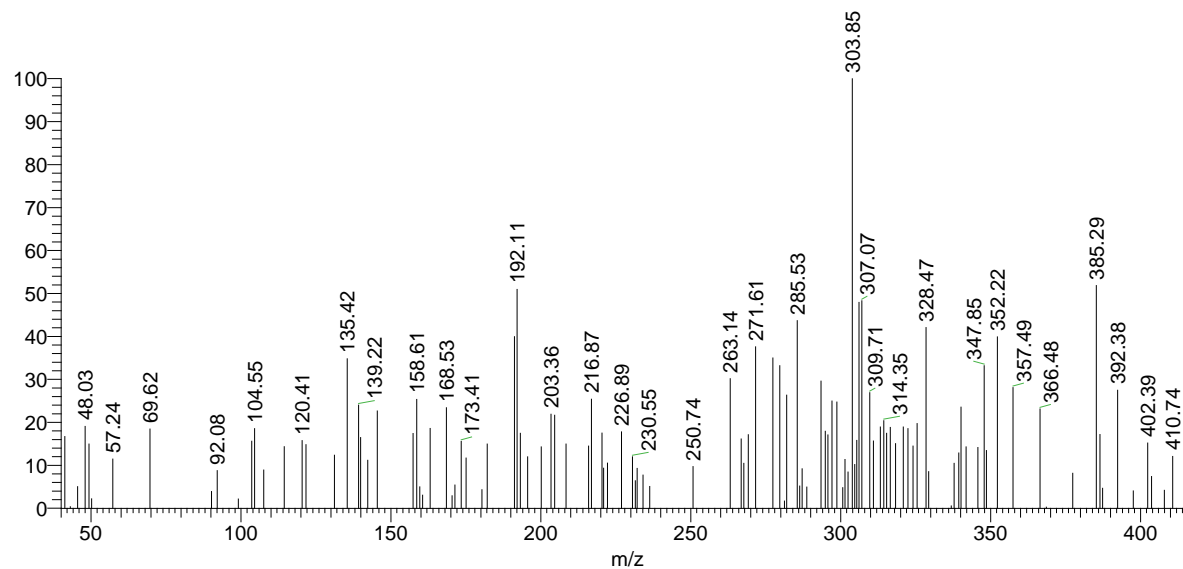

Fig.26. Mass spectra of compound 6j

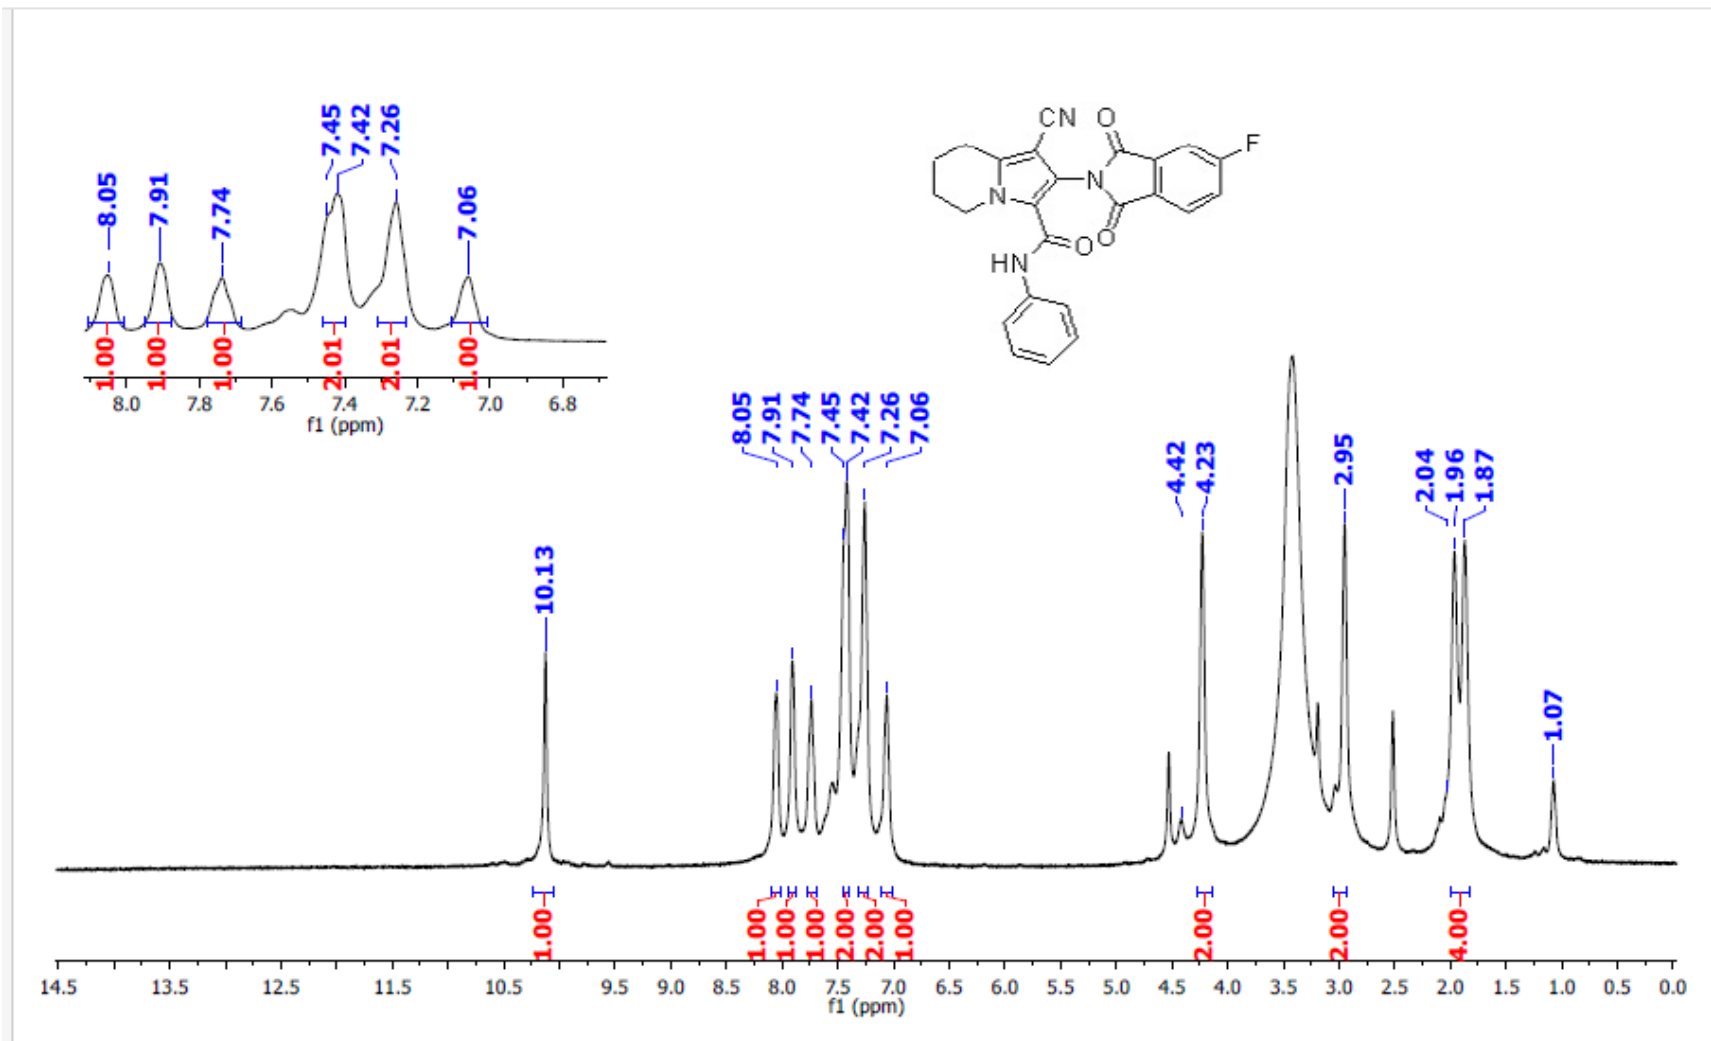

Fig.27.  $^1\text{H}$  NMR of compound 6k (400 MHz,  $\text{DMSO-}d_6$ )

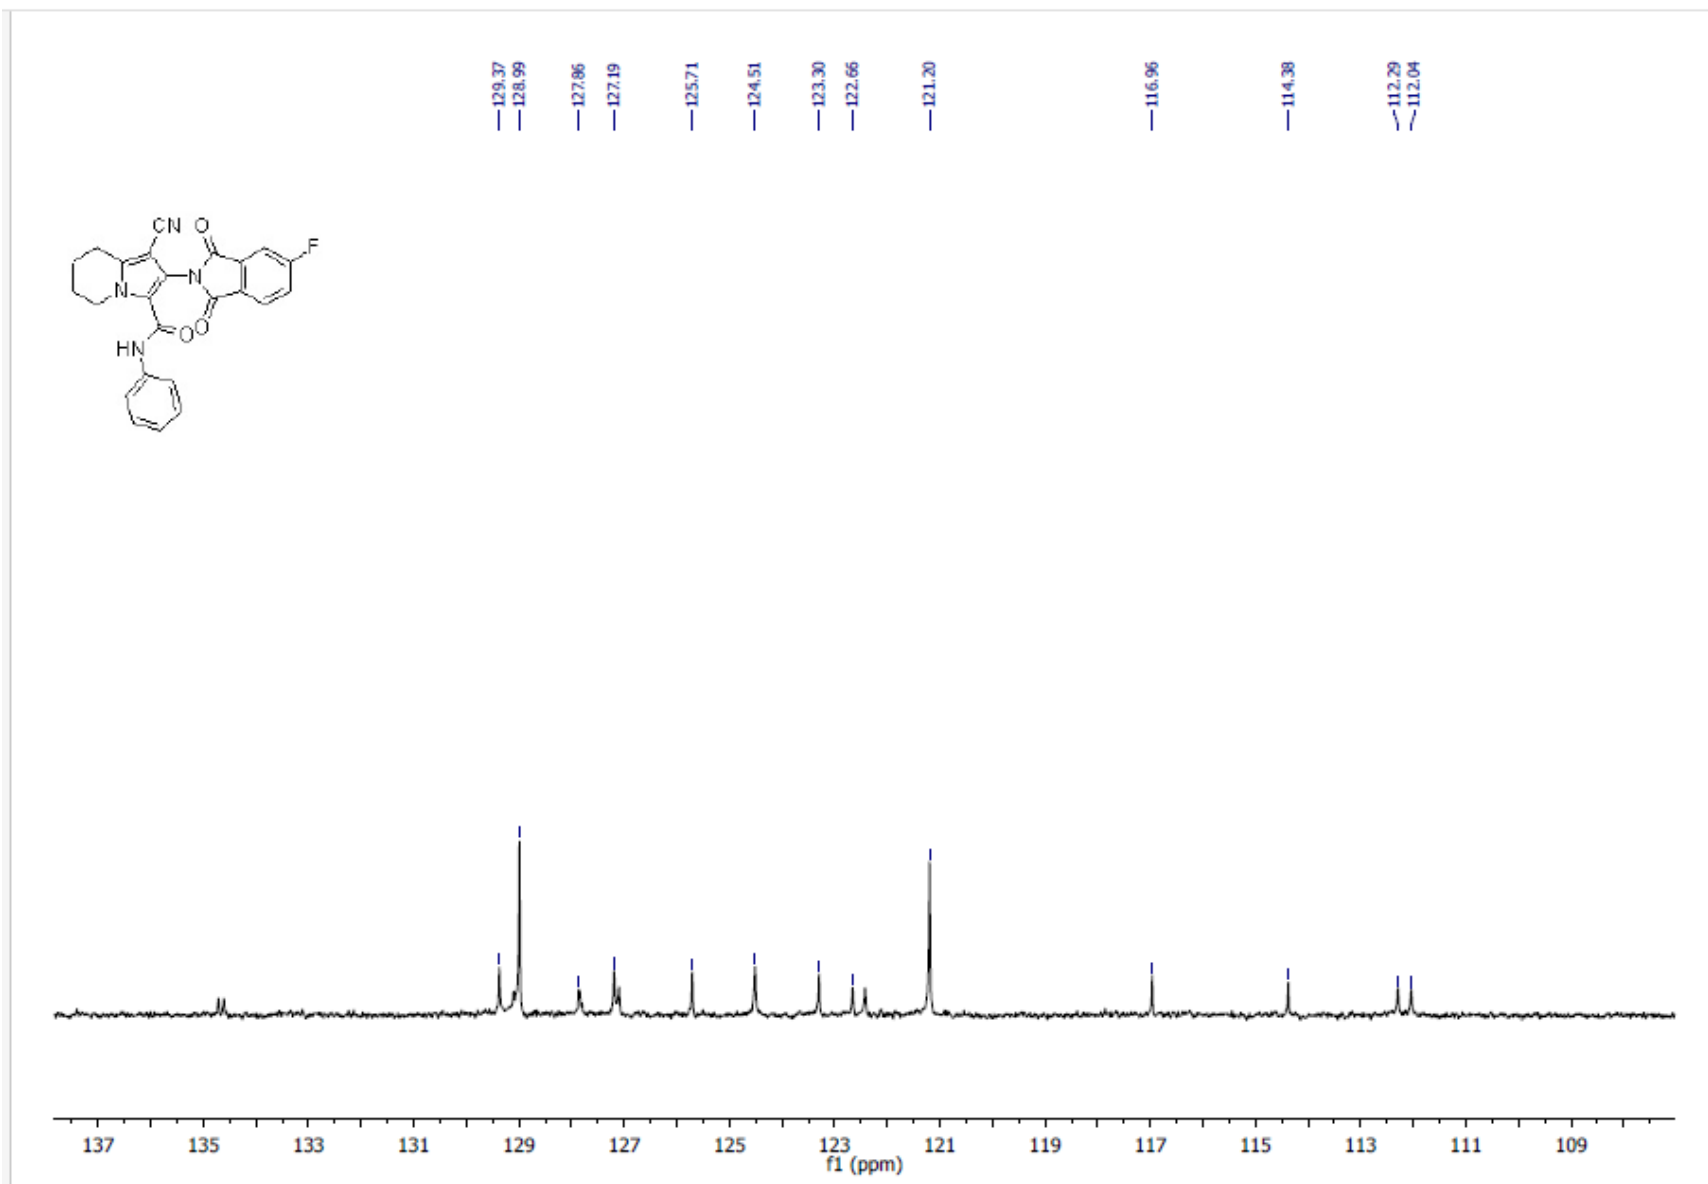

Fig.28.  $^{13}\text{C}$  NMR of compound 6k (100 MHz,  $\text{DMSO-}d_6$ )

RT: 0.00 - 4.32 SM: 15B

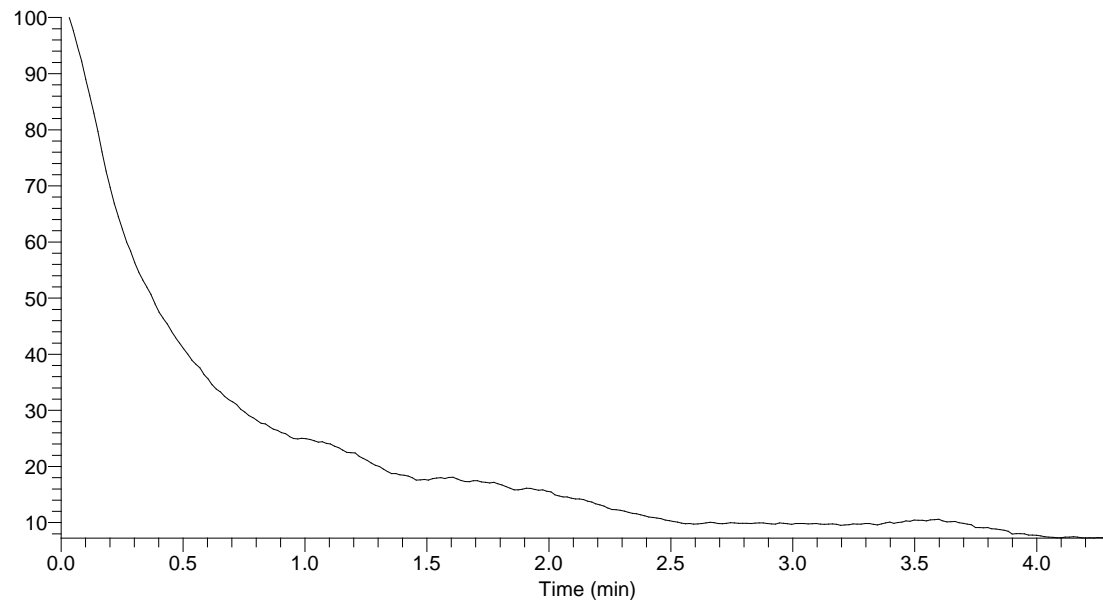

NL:  
5.16E5  
TIC MS  
Amr-Lotfy-  
7E

Amr-Lotfy-7E #117 RT: 1.98 AV: 1 SB: 6 2.80 , 2.48-2.54 NL: 7.02E2  
T: + c EI Full ms [40.00-1000.00]

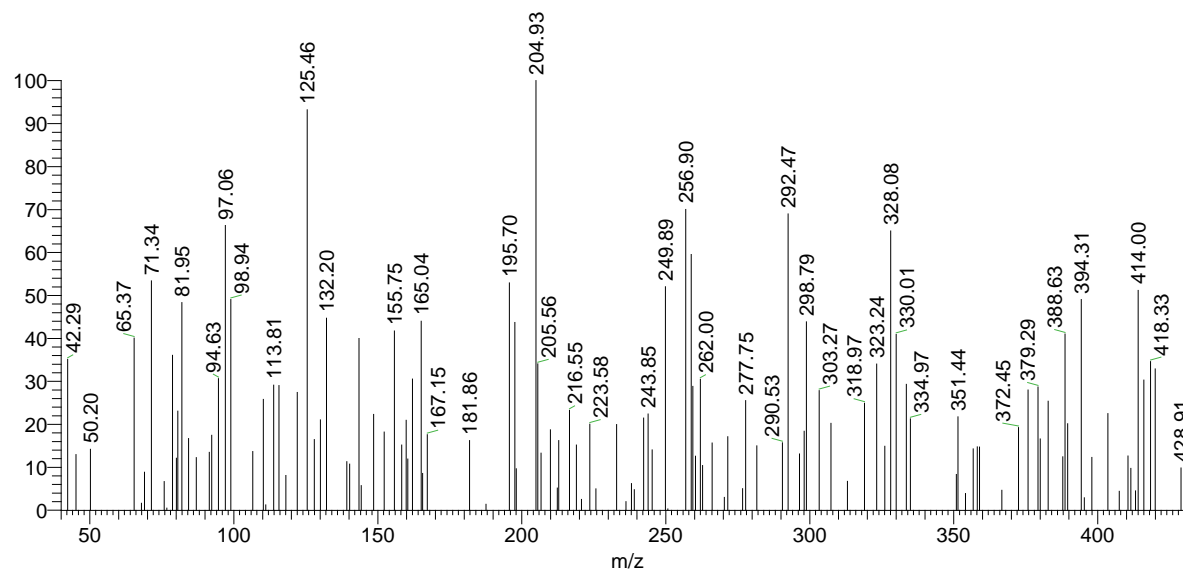

Fig.29. Mass spectra of compound 6k

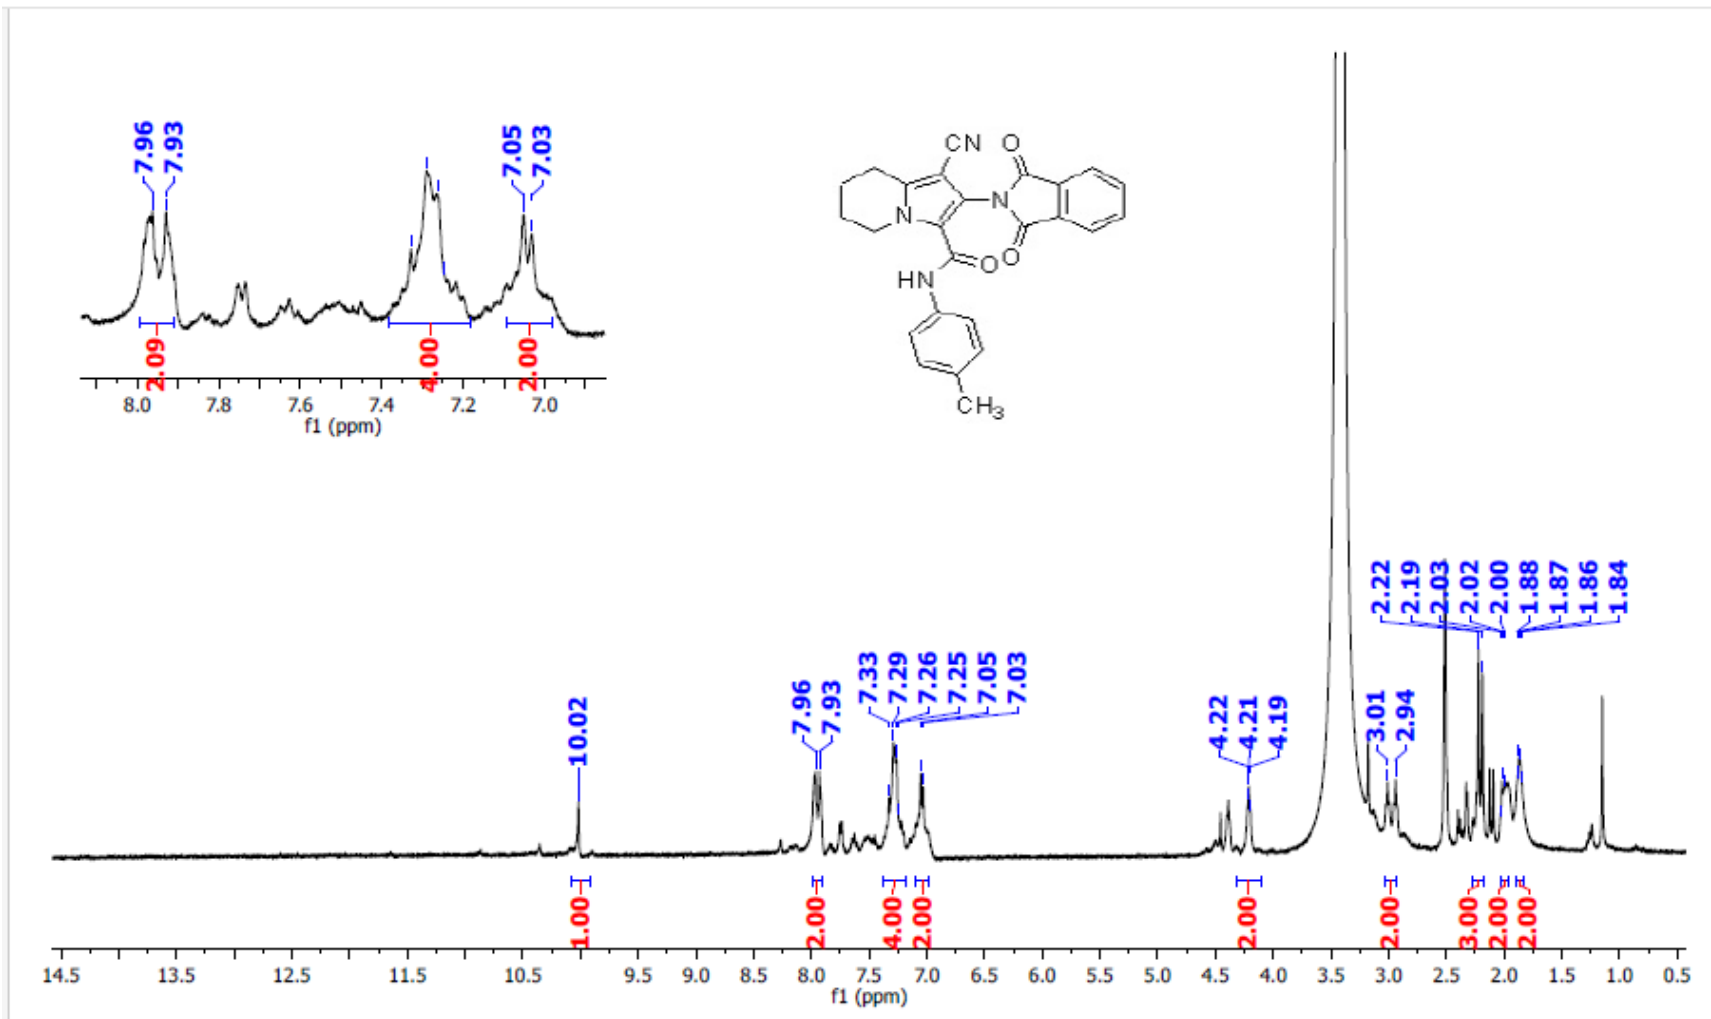

Fig.30. <sup>1</sup>H NMR of compound 6l (400 MHz, DMSO-*d*<sub>6</sub>)



RT: 1.36 - 1.51 SM: 15B

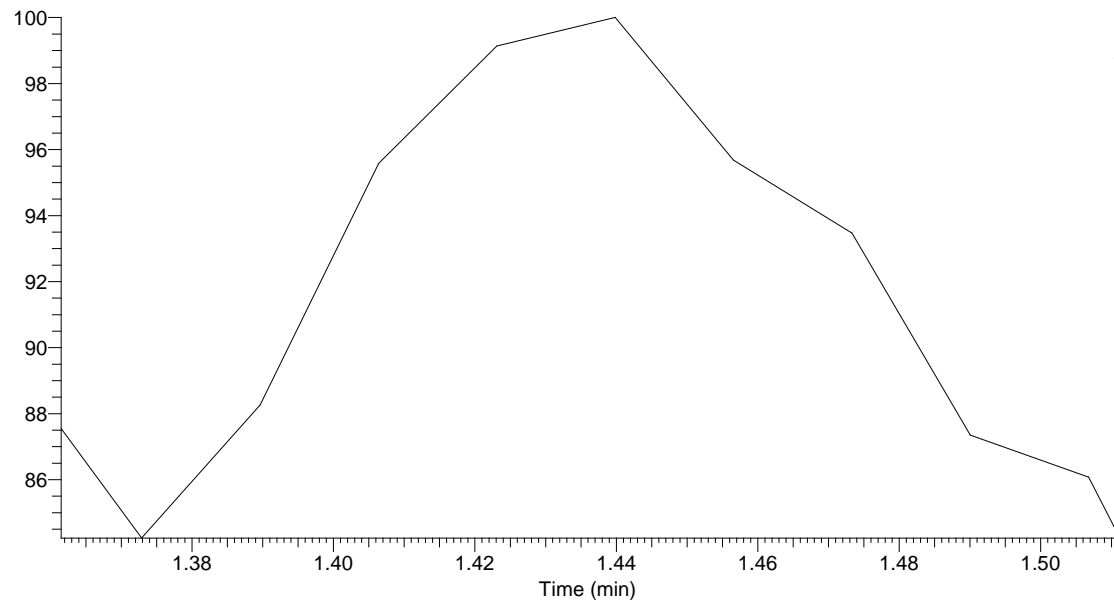

NL:  
1.64E4  
TIC MS  
Amr-Lotfy-  
7B

Amr-Lotfy-7B #96-97 RT: 1.62-1.64 AV: 2 SB: 6 2.80 , 2.48-2.54 NL: 1.79E2  
T: + c EI Full ms [40.00-1000.00]

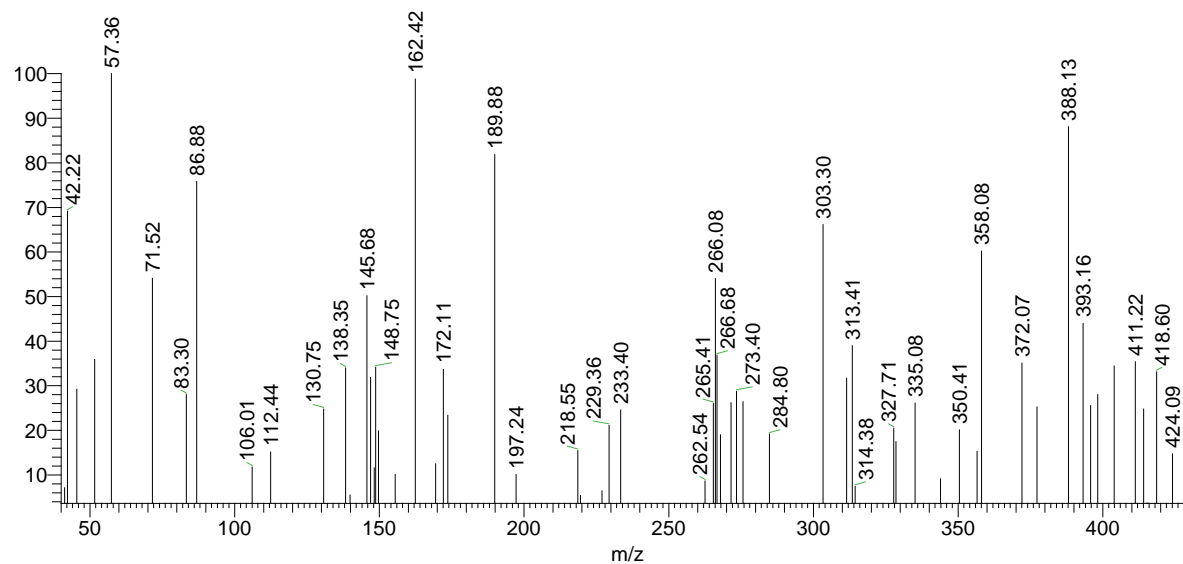

Fig.31. Mass spectra of compound 61

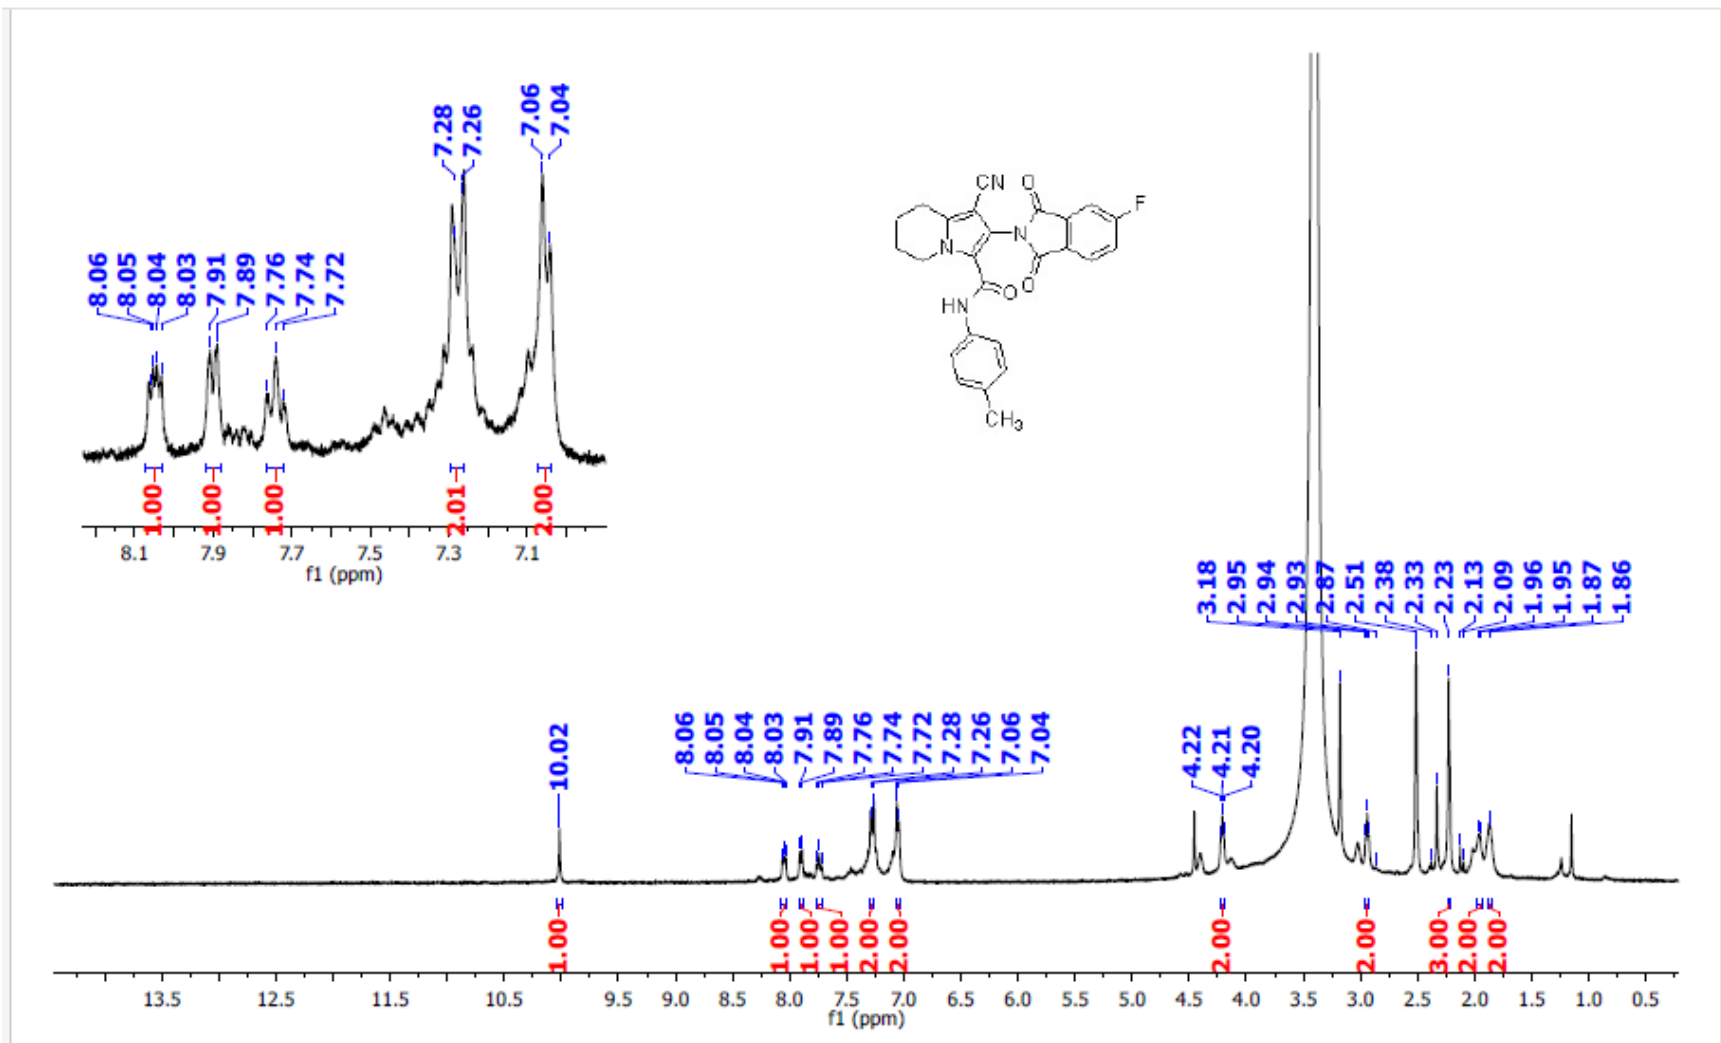

Fig.32. <sup>1</sup>H NMR of compound 6m (400 MHz, DMSO-*d*<sub>6</sub>)

RT: 2.67 - 2.80 SM: 15B

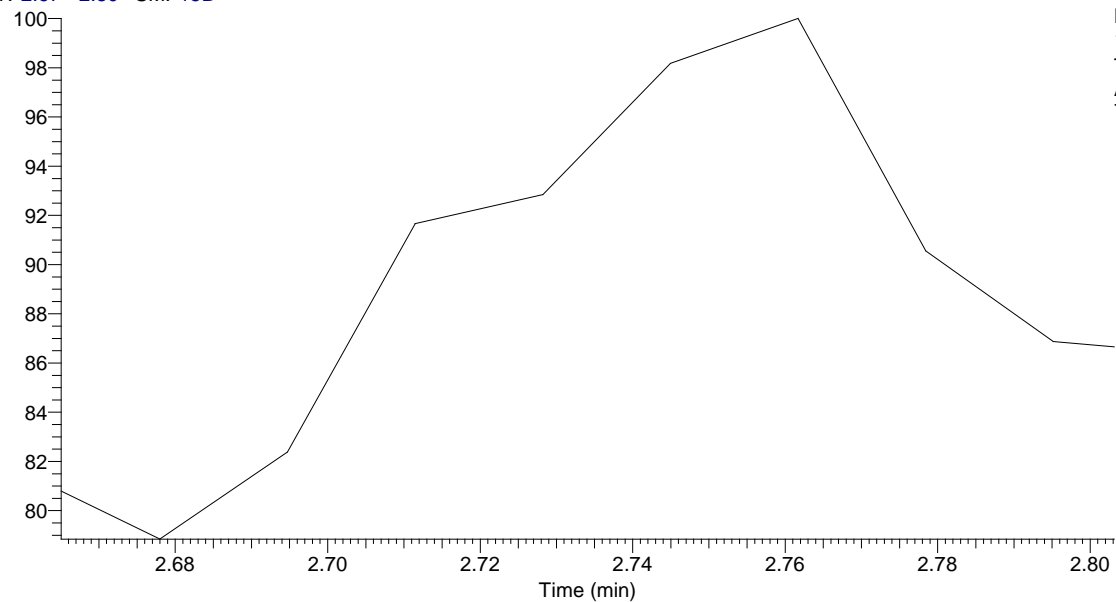

Amr-Lotfy-7F #120-123 RT: 2.03-2.08 AV: 4 SB: 6 2.80 , 2.48-2.54 NL: 7.97E1  
T: + c EI Full ms [40.00-1000.00]

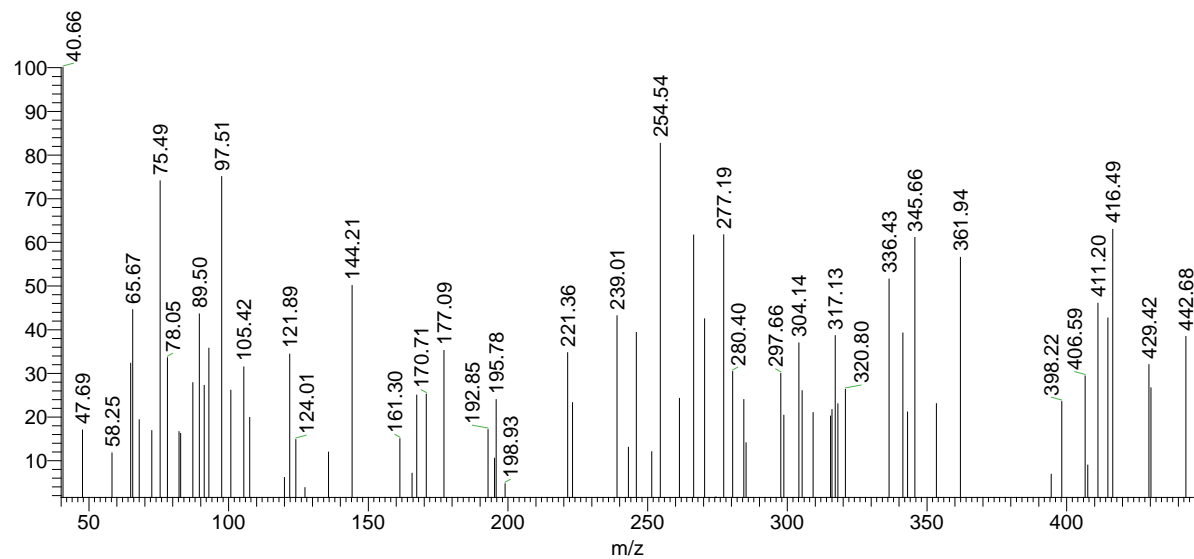

Fig.33. Mass spectra of compound 6m

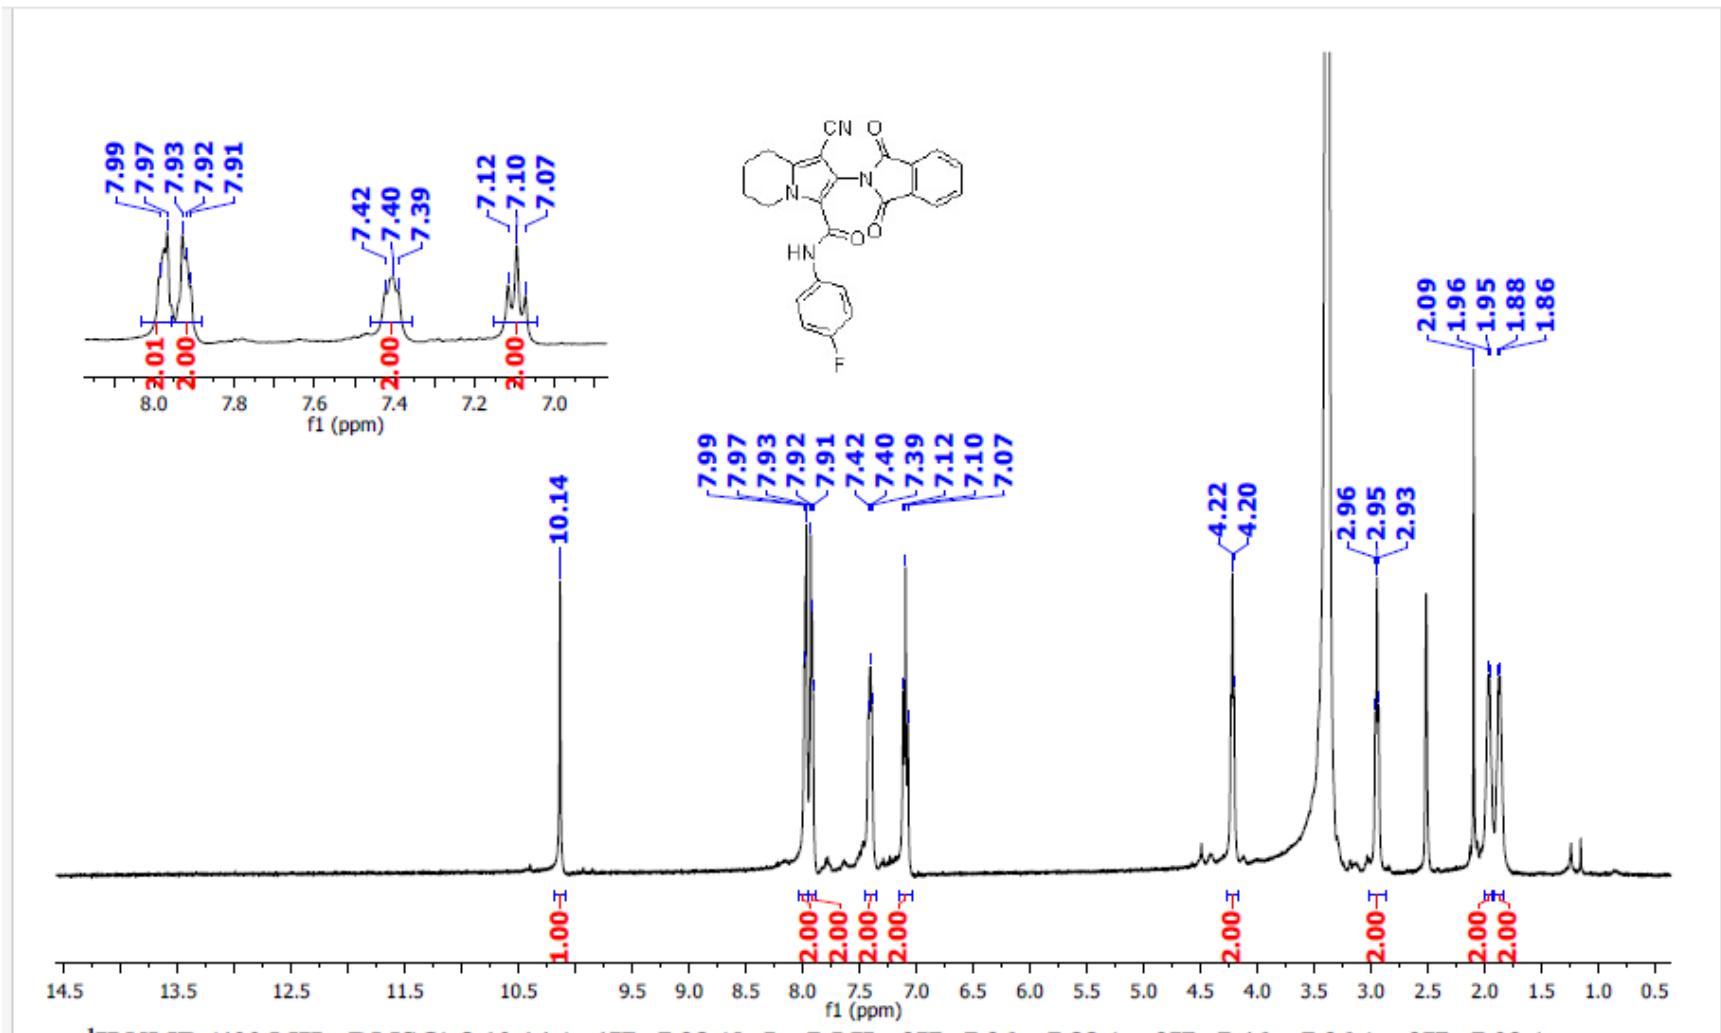

Fig.34. <sup>1</sup>H NMR of compound 6n (400 MHz, DMSO-*d*<sub>6</sub>)

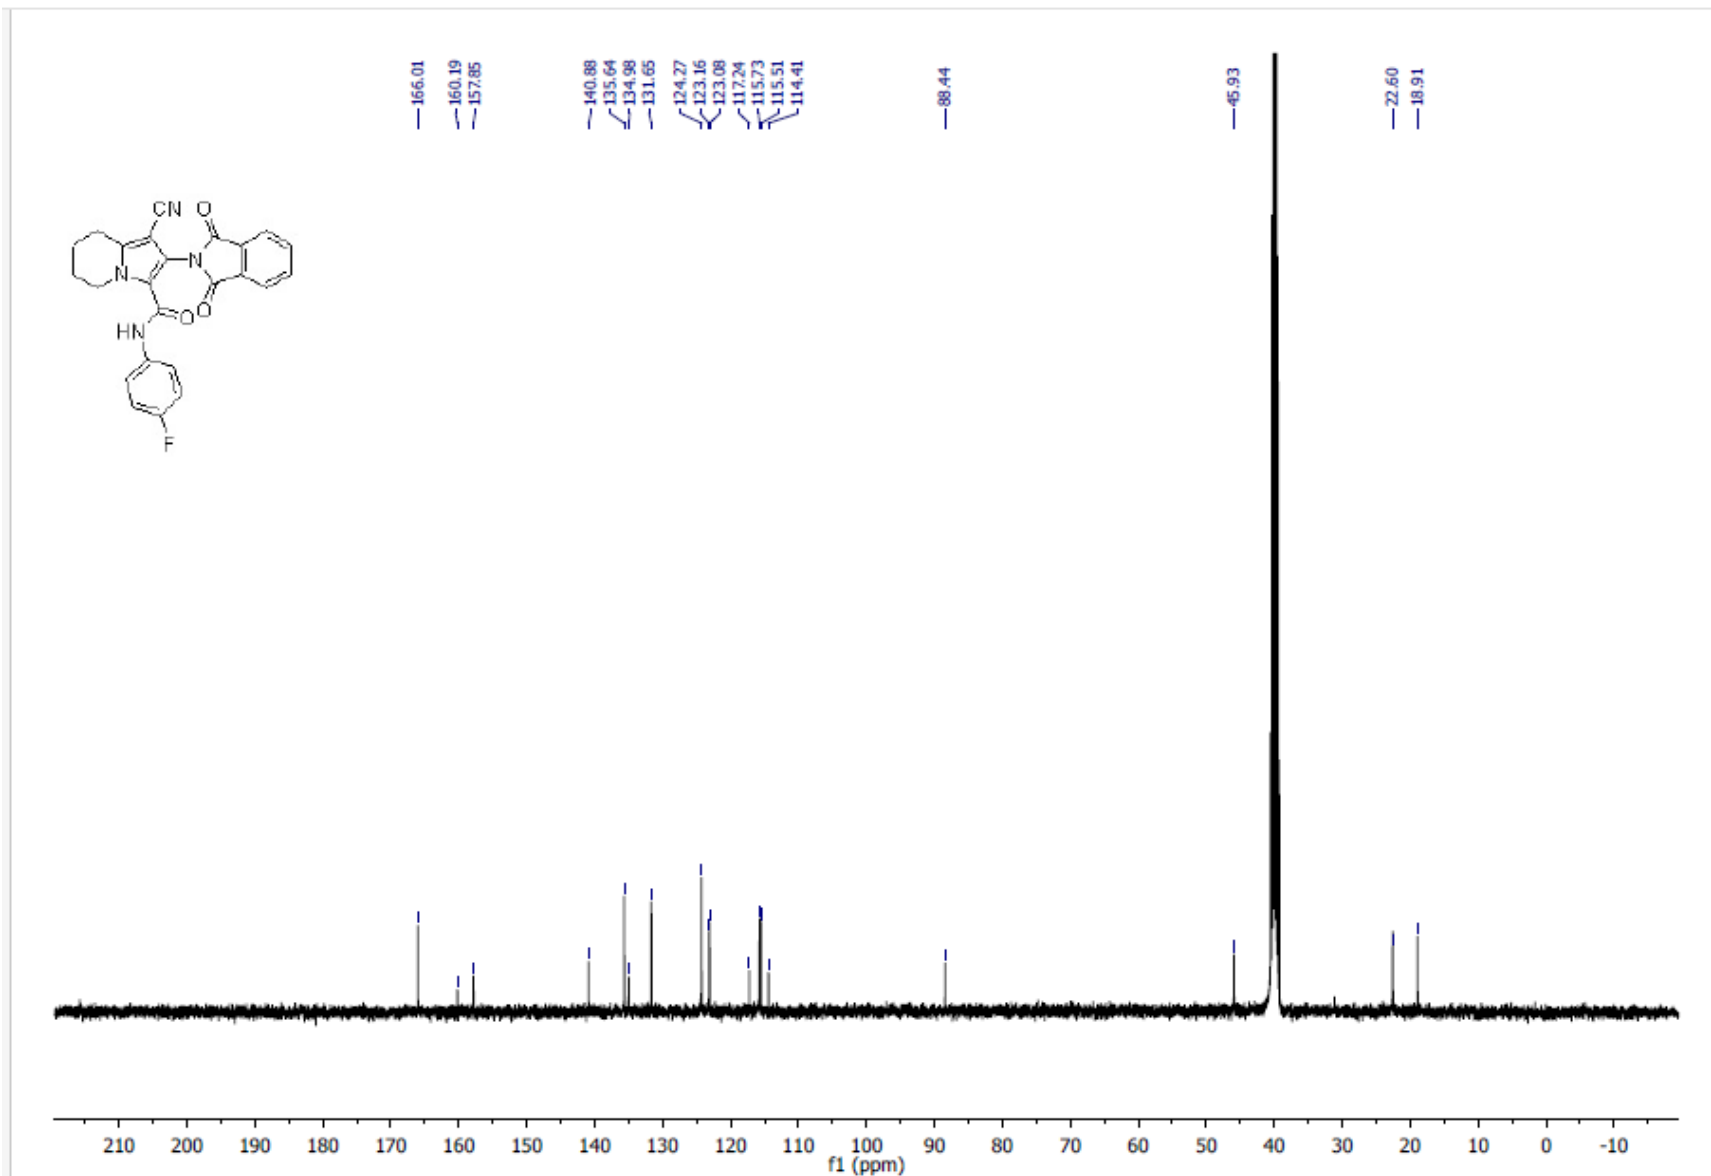

Fig.35. <sup>13</sup>C NMR of compound 6n (100 MHz, DMSO-*d*<sub>6</sub>)

RT: 3.51 - 3.60 SM: 15B

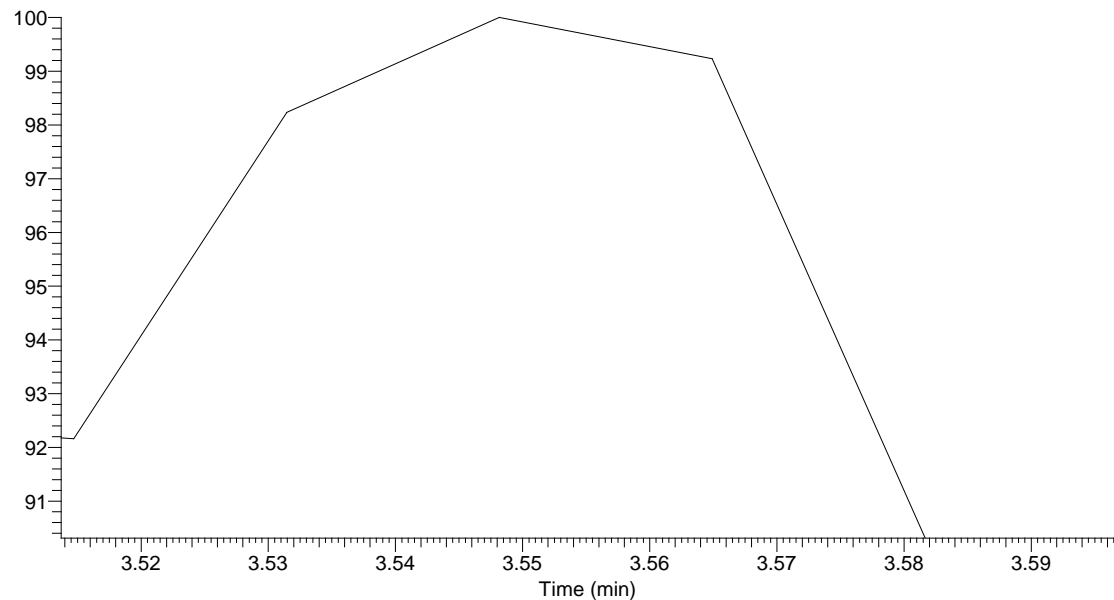

NL:  
2.22E4  
TIC MS  
Amr-Lotfy-  
7C

Amr-Lotfy-7C #138-141 RT: 2.33-2.38 AV: 4 SB: 6 2.80, 2.48-2.54 NL: 2.43E2  
T: + c EI Full ms [40.00-1000.00]

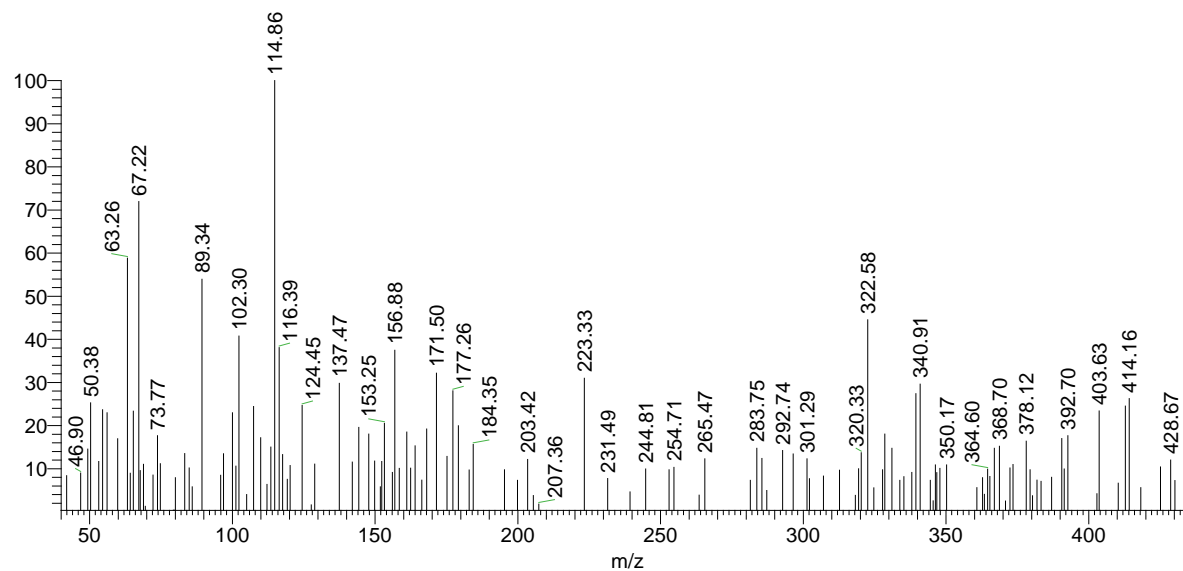

Fig.36. Mass spectra of compound 6n

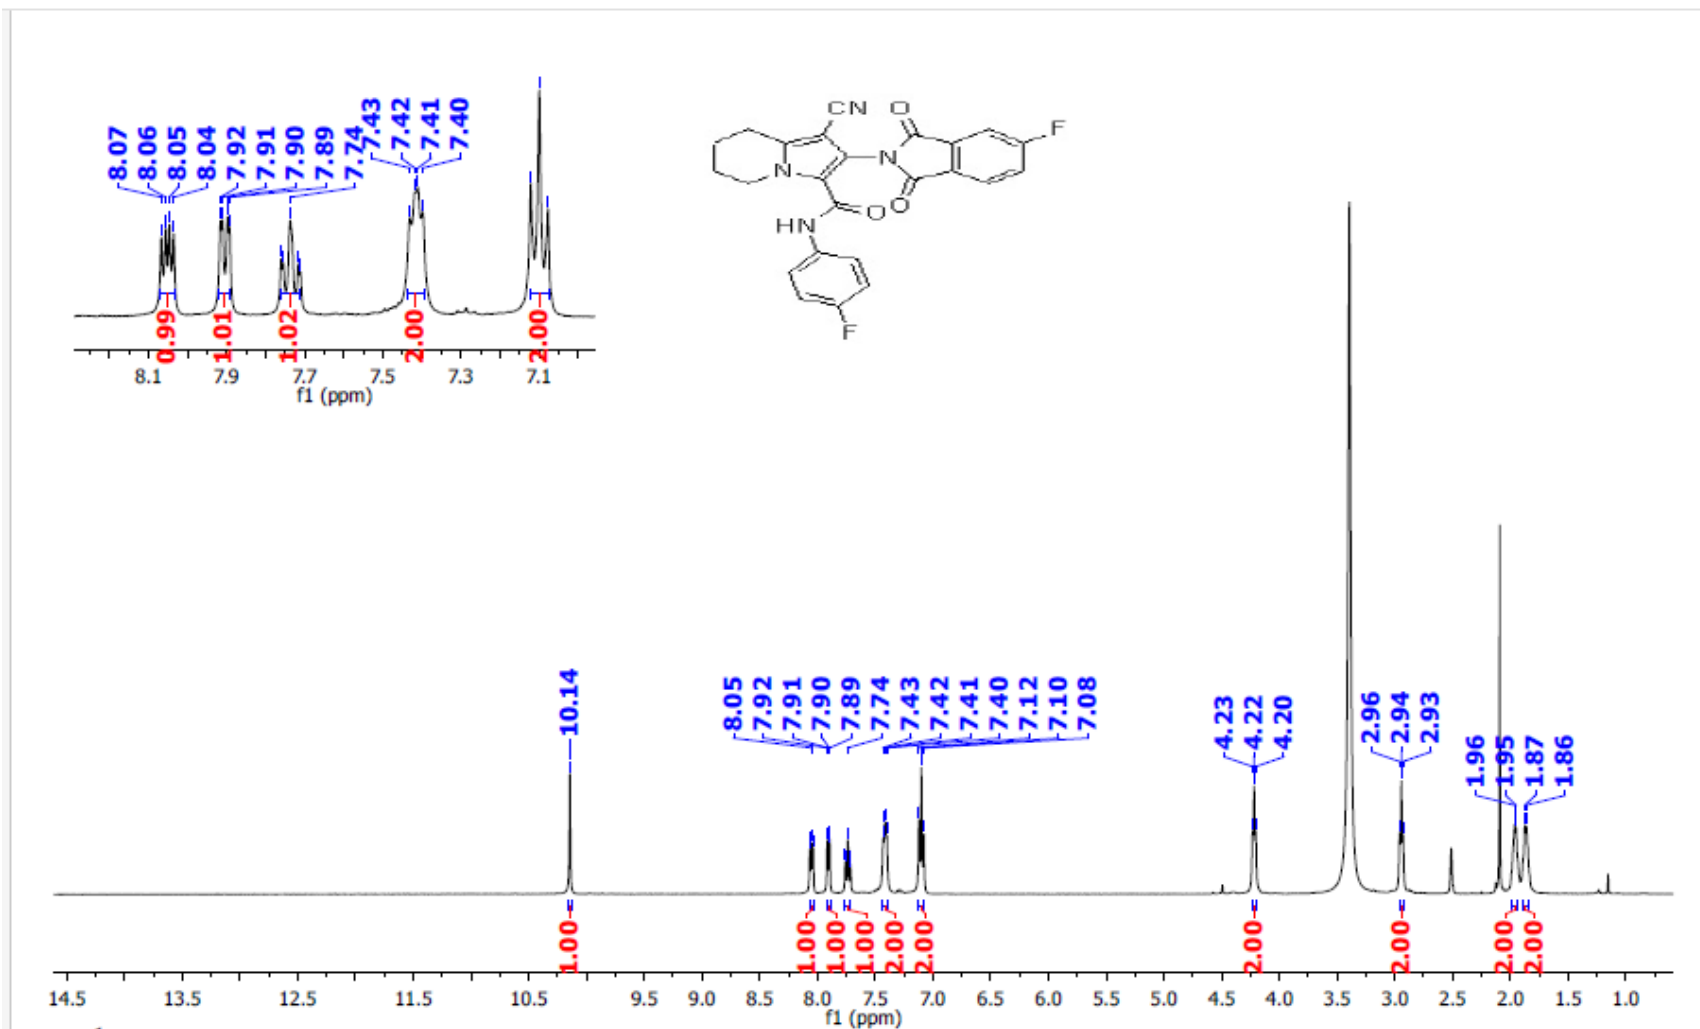

Fig.37. <sup>1</sup>H NMR of compound 6o (400 MHz, DMSO-*d*<sub>6</sub>)

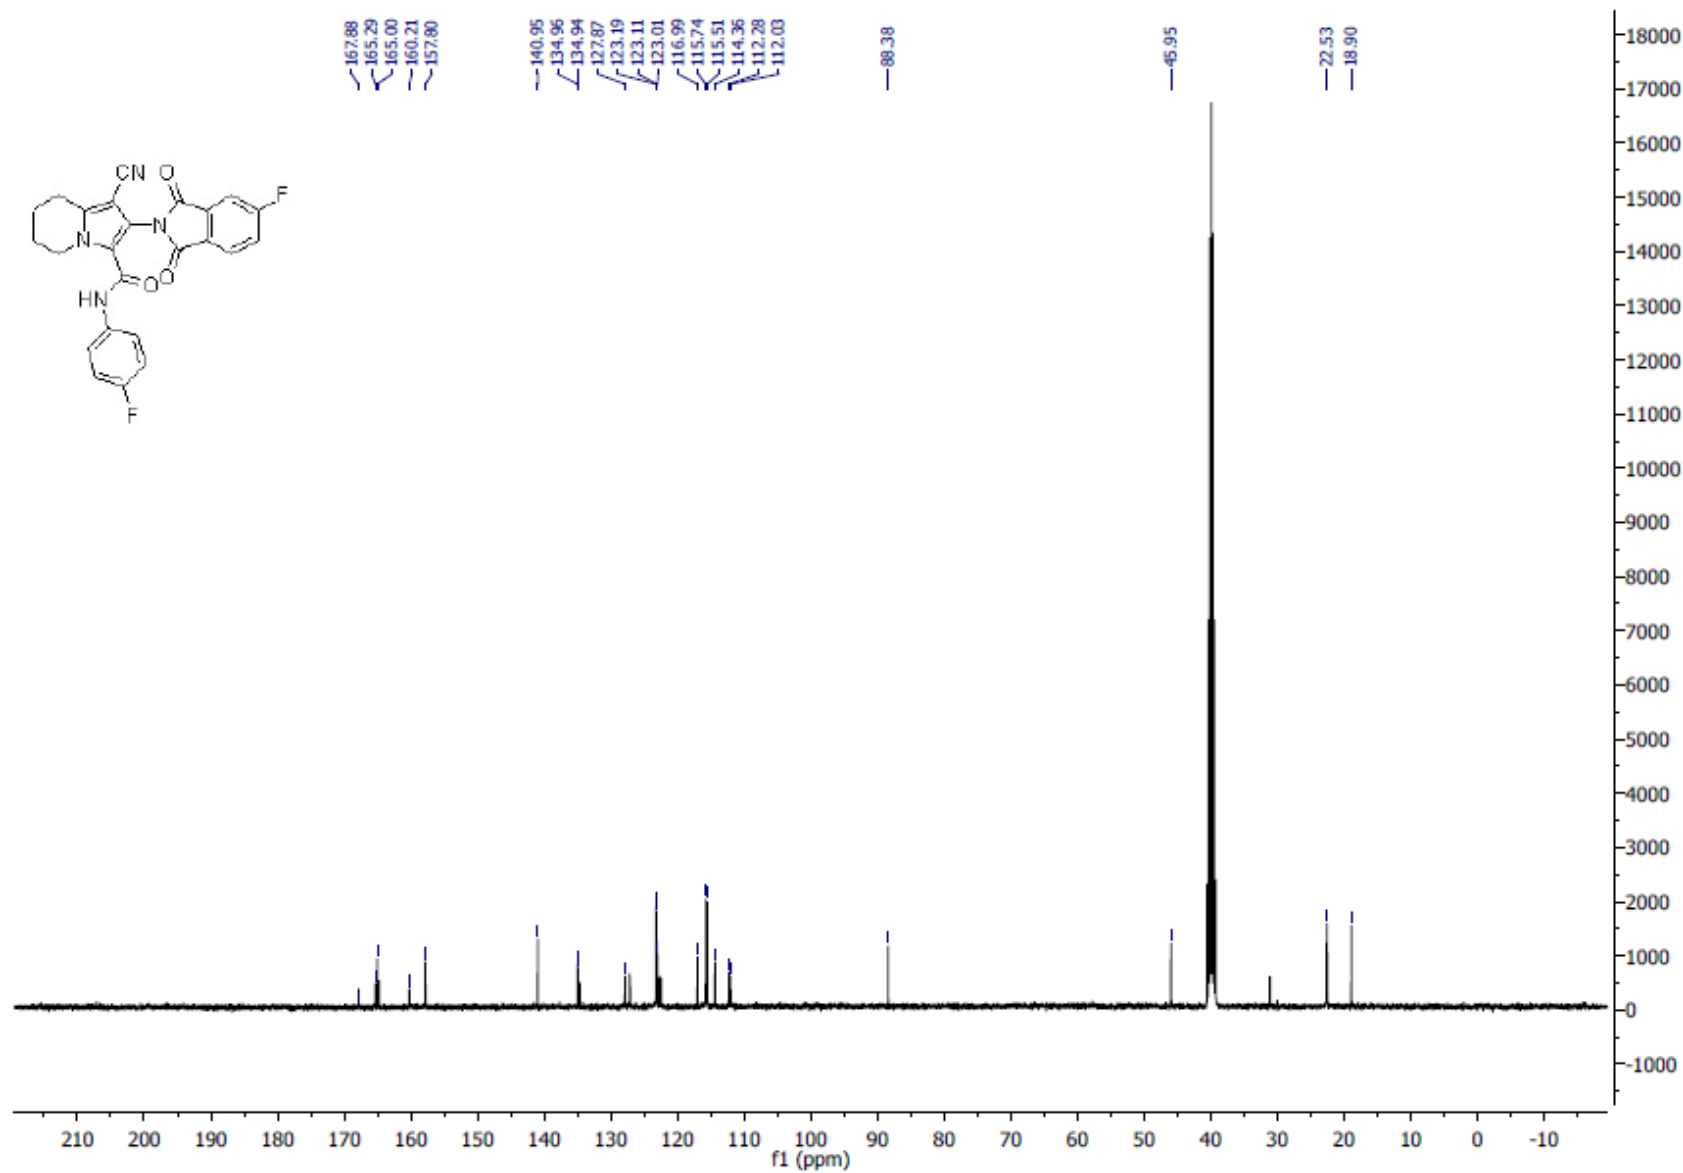

Fig.38.  $^{13}\text{C}$  NMR of compound 6o (100 MHz,  $\text{DMSO-}d_6$ )



RT: 4.19 - 4.46 SM: 15B

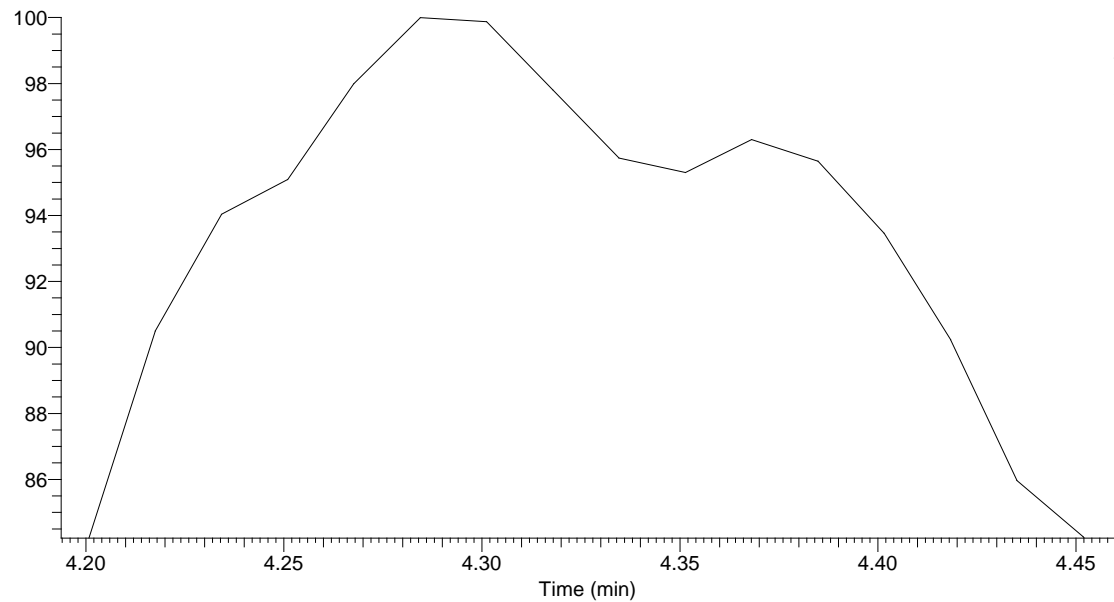

Amr-Lotfy-7G #272 RT: 4.57 AV: 1 SB: 6 2.80, 2.48-2.54 NL: 3.86E2  
T: + c EI Full ms [40.00-1000.00]

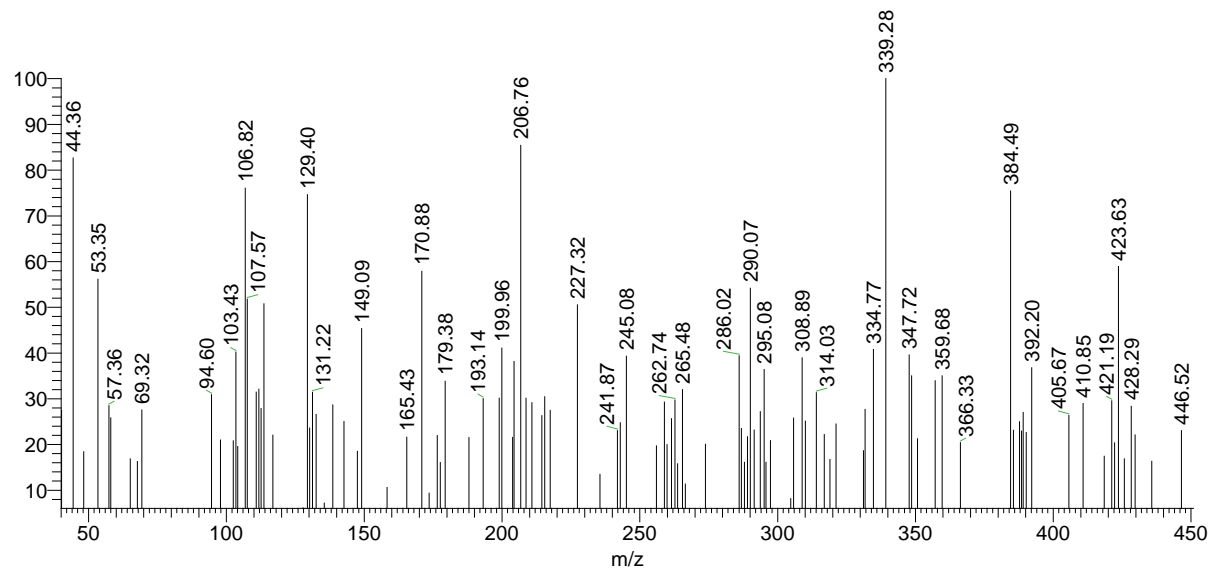

Fig.39. Mass spectra of compound 60

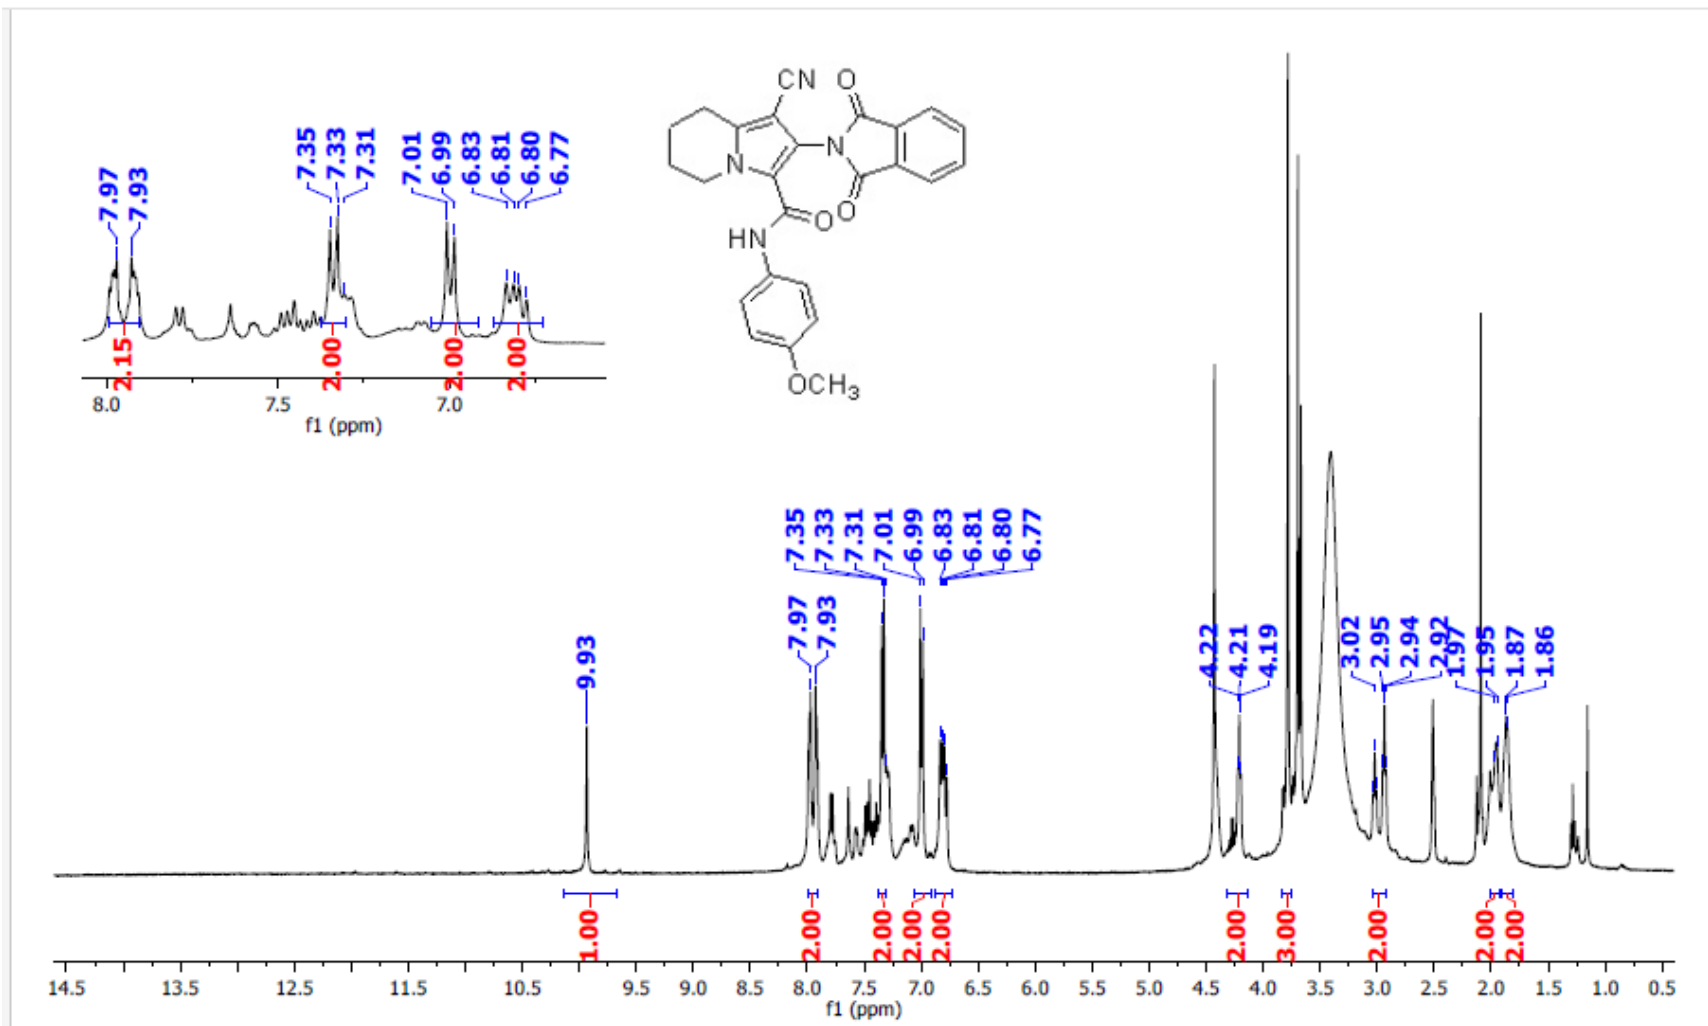

Fig.40. <sup>1</sup>H NMR of compound 6p (400 MHz, DMSO-*d*<sub>6</sub>)

RT: 4.02 - 4.50 SM: 15B

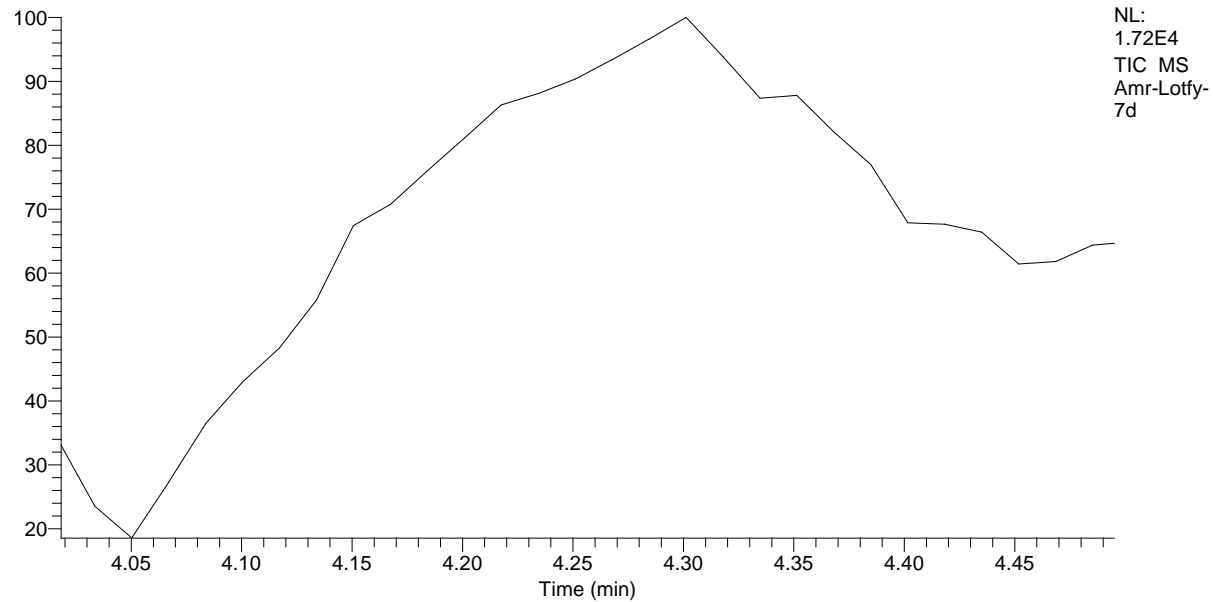

Amr-Lotfy-7d #198-201 RT: 3.33-3.38 AV: 4 SB: 6 2.80, 2.48-2.54 NL: 1.12E2  
T: + c EI Full ms [40.00-1000.00]

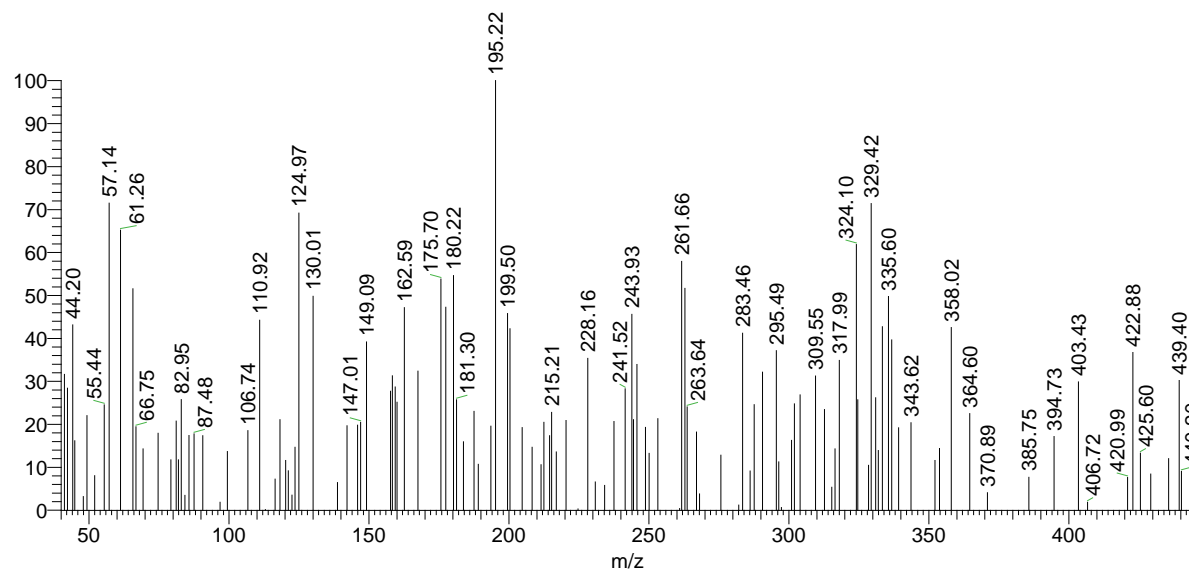

Fig.41. Mass spectra of compound 6p

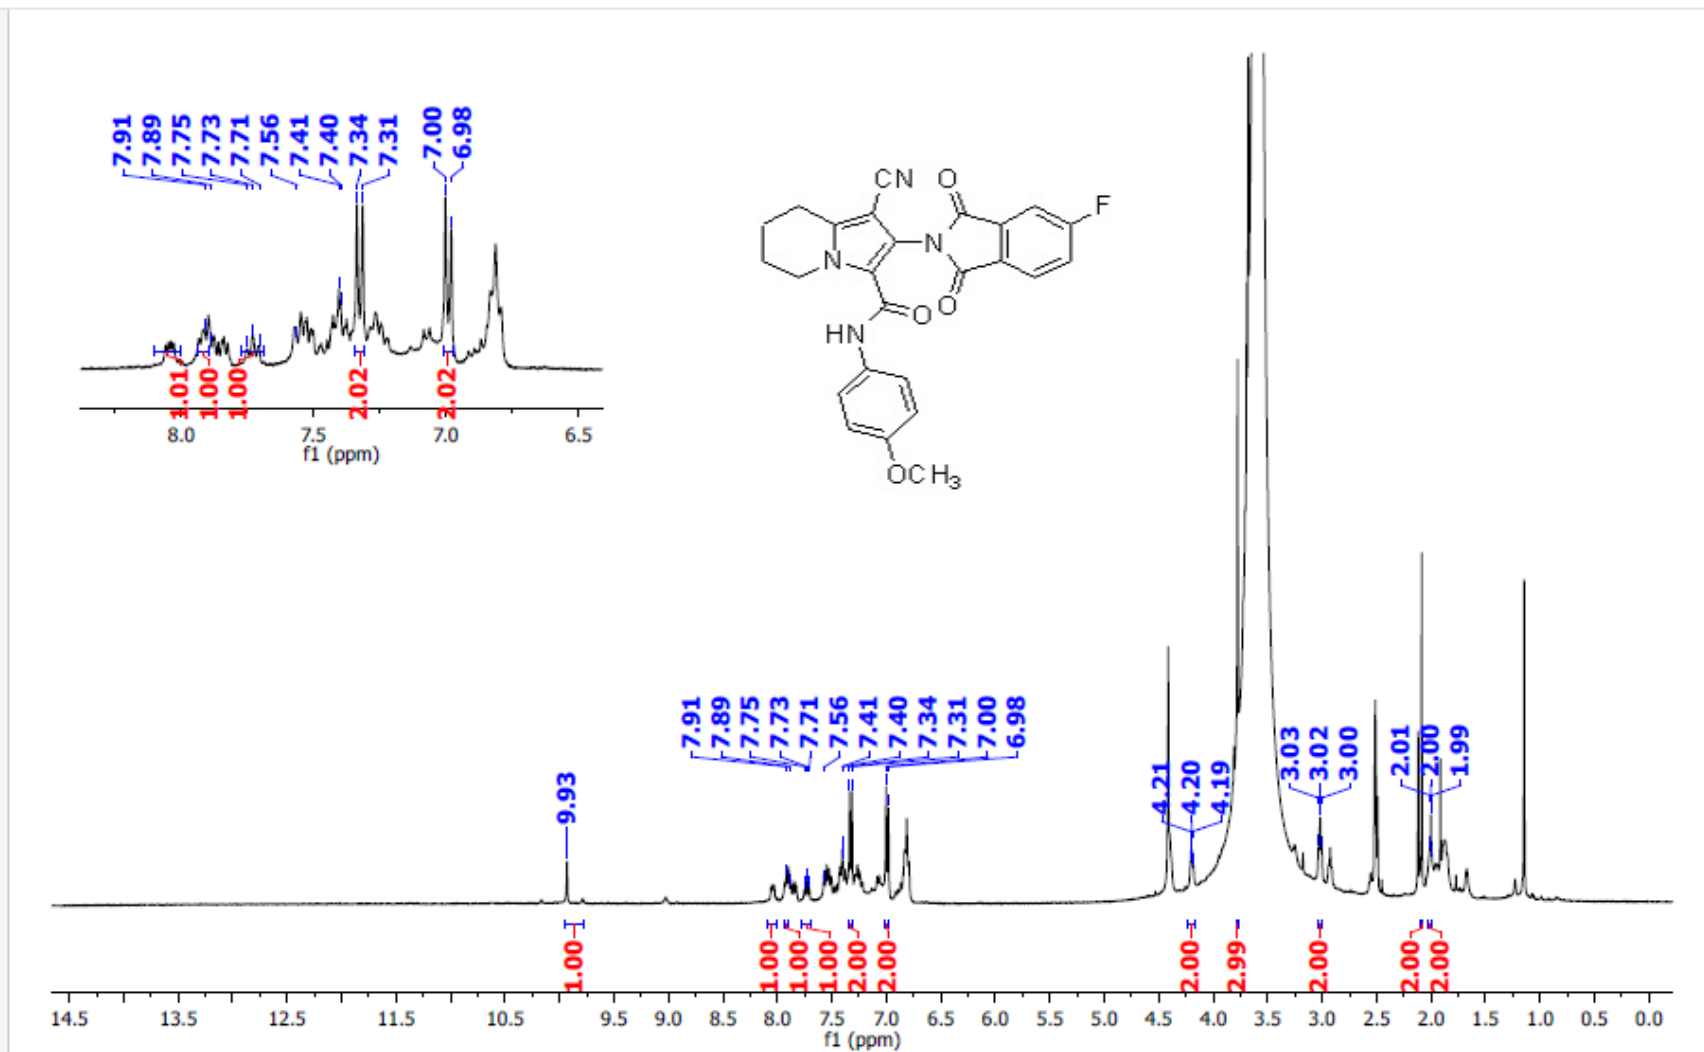

Fig.42. <sup>1</sup>H NMR of compound 6q (400 MHz, DMSO-*d*<sub>6</sub>)

RT: 1.08 - 1.27 SM: 15B

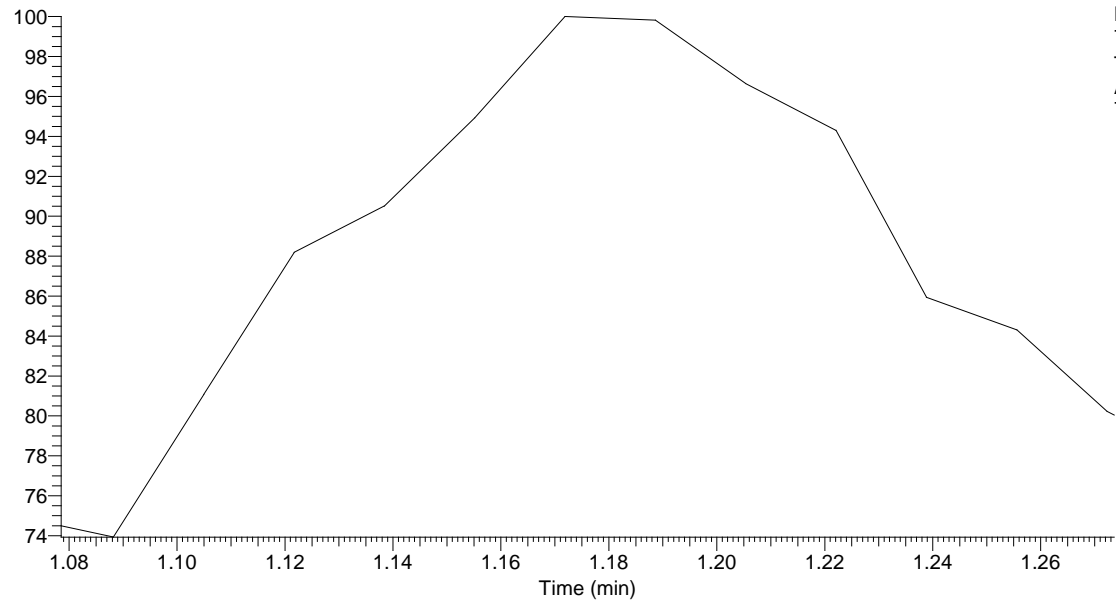

NL:  
7.34E3  
TIC MS  
Amr-Lofly-  
7H

Amr-Lofly-7H #54-55 RT: 0.92-0.94 AV: 2 SB: 2 1.66, 1.66 NL: 1.42E2  
T: + c EI Full ms [40.00-1000.00]

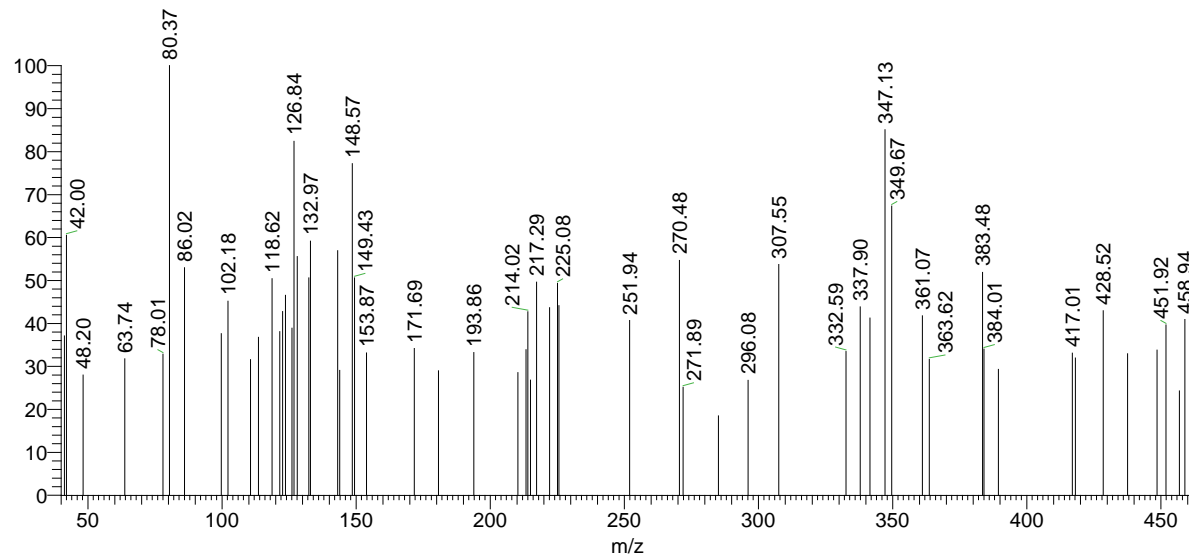

Fig.43. Mass spectra of compound 6q

# Raw data used to calculate the IC<sub>50</sub> for compounds 6a-q against HePG-2, HCT-116, and MCF-7 cell lines

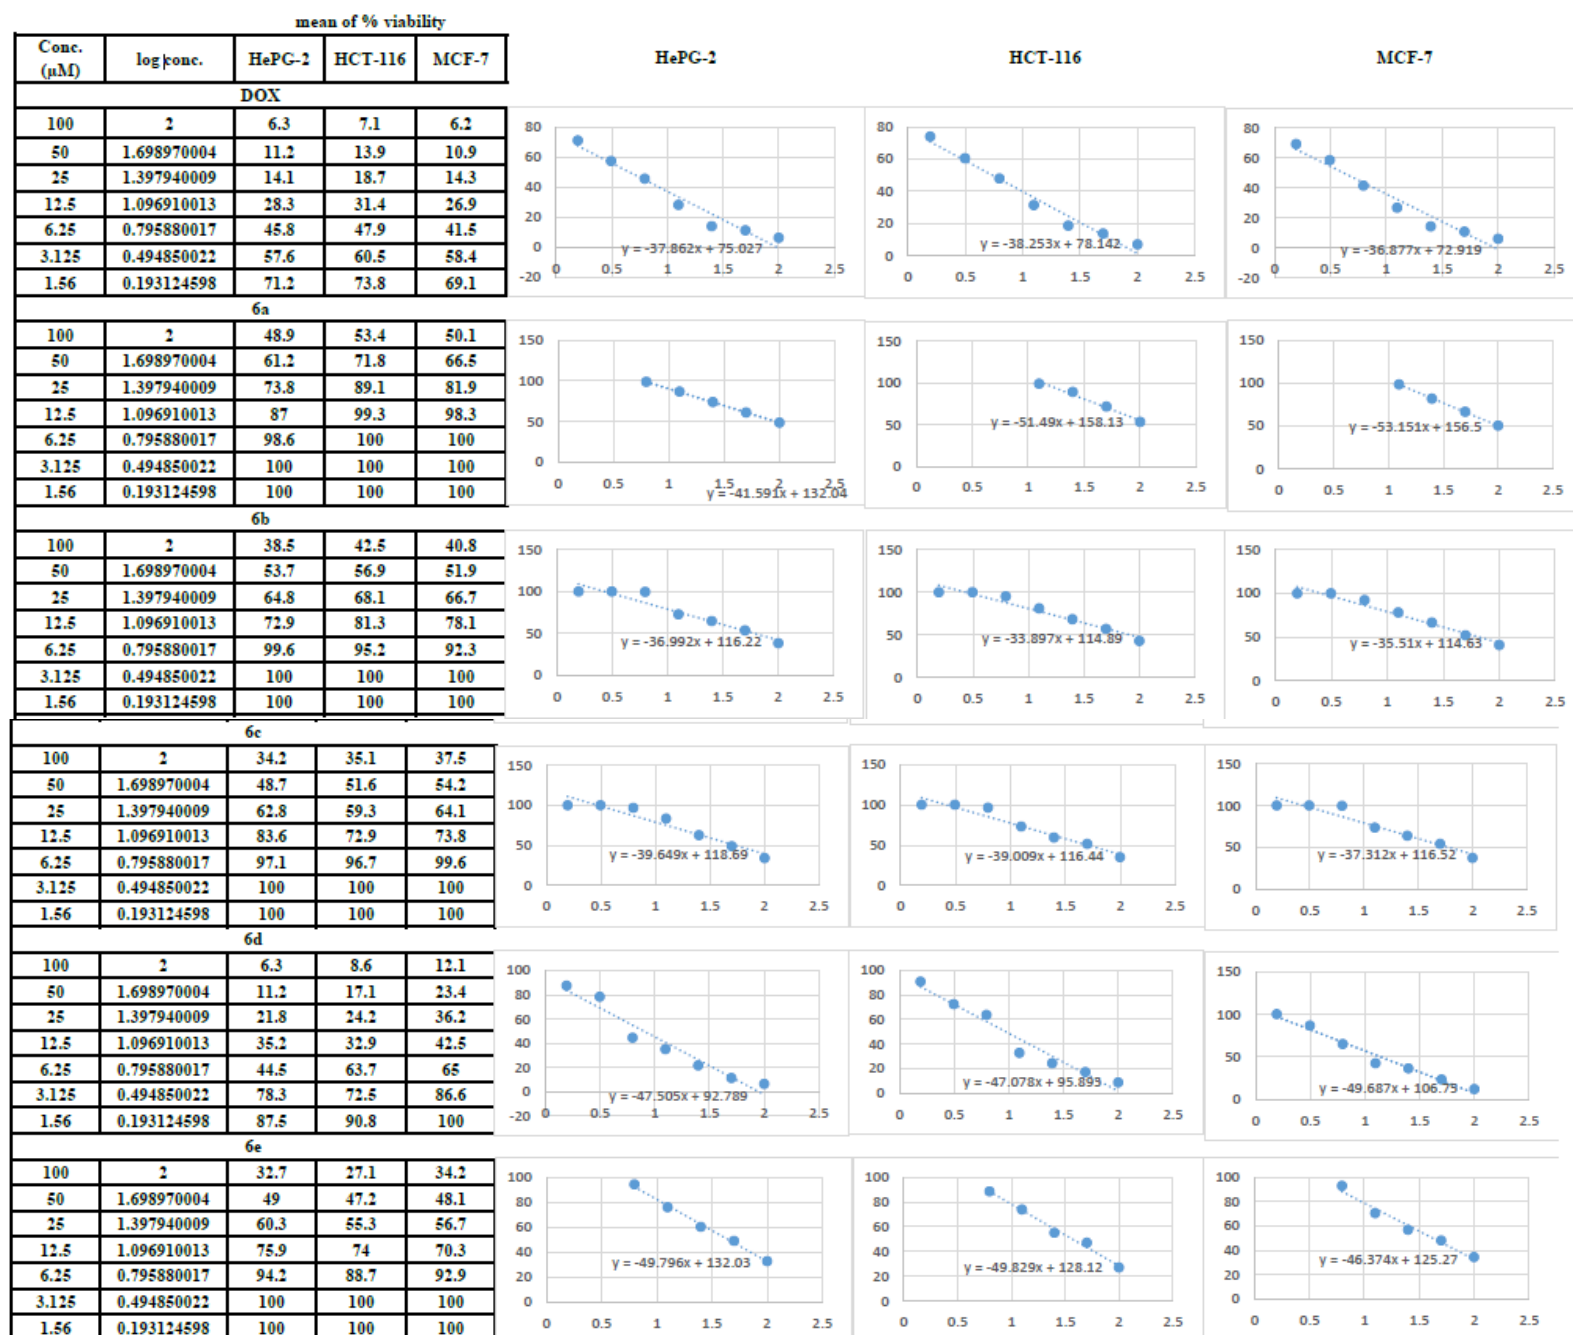

| 6f    |             |      |      |      |
|-------|-------------|------|------|------|
| 100   | 2           | 50.1 | 57.8 | 52.9 |
| 50    | 1.698970004 | 61.4 | 74.6 | 71.5 |
| 25    | 1.397940009 | 75.9 | 93.1 | 84.6 |
| 12.5  | 1.096910013 | 89   | 100  | 99.3 |
| 6.25  | 0.795880017 | 100  | 100  | 100  |
| 3.125 | 0.494850022 | 100  | 100  | 100  |
| 1.56  | 0.193124598 | 100  | 100  | 100  |

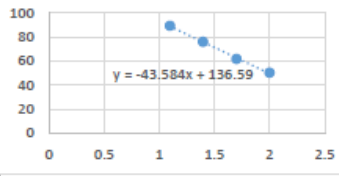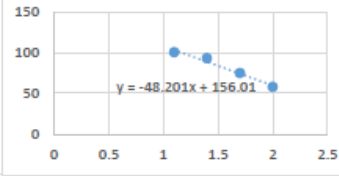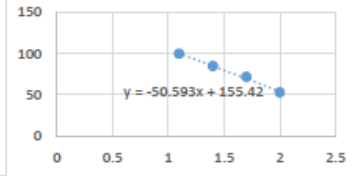

| 6g    |             |      |      |      |
|-------|-------------|------|------|------|
| 100   | 2           | 37.1 | 43.5 | 45.8 |
| 50    | 1.698970004 | 50.9 | 52.7 | 54.9 |
| 25    | 1.397940009 | 64.2 | 61.8 | 68.6 |
| 12.5  | 1.096910013 | 75.3 | 82.1 | 83.1 |
| 6.25  | 0.795880017 | 99.4 | 98.6 | 96.7 |
| 3.125 | 0.494850022 | 100  | 100  | 100  |
| 1.56  | 0.193124598 | 100  | 100  | 100  |

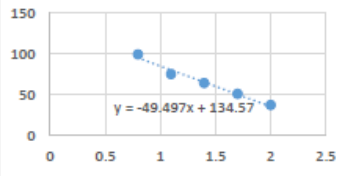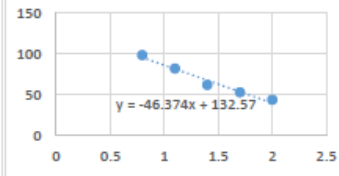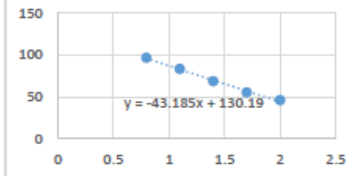

| 6h    |             |      |      |      |
|-------|-------------|------|------|------|
| 100   | 2           | 49.8 | 55.7 | 52.1 |
| 50    | 1.698970004 | 64.5 | 75.2 | 73.8 |
| 25    | 1.397940009 | 76.2 | 88.9 | 89.6 |
| 12.5  | 1.096910013 | 90.9 | 100  | 99.5 |
| 6.25  | 0.795880017 | 100  | 100  | 100  |
| 3.125 | 0.494850022 | 100  | 100  | 100  |
| 1.56  | 0.193124598 | 100  | 100  | 100  |

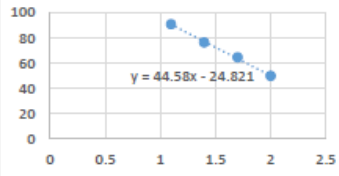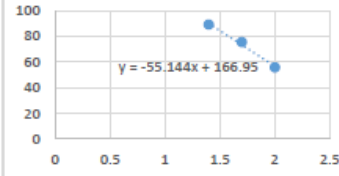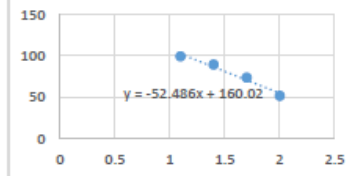

|       |             |      |      |      |
|-------|-------------|------|------|------|
| 50    | 1.698970004 | 30.8 | 24.7 | 36.2 |
| 25    | 1.397940009 | 44.2 | 36.1 | 47.5 |
| 12.5  | 1.096910013 | 56.3 | 44.9 | 61.3 |
| 6.25  | 0.795880017 | 67.9 | 69.2 | 75.8 |
| 3.125 | 0.494850022 | 95.7 | 89.6 | 93.6 |
| 1.56  | 0.193124598 | 100  | 100  | 100  |

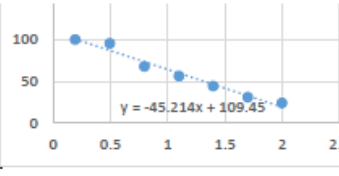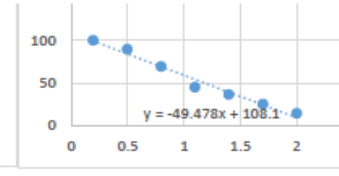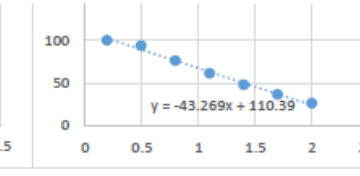

| 6j    |             |      |      |      |
|-------|-------------|------|------|------|
| 100   | 2           | 29.9 | 26.2 | 31.2 |
| 50    | 1.698970004 | 46.1 | 35.3 | 39.6 |
| 25    | 1.397940009 | 51.2 | 44.5 | 52.7 |
| 12.5  | 1.096910013 | 67.2 | 56.4 | 63.5 |
| 6.25  | 0.795880017 | 78   | 72.5 | 79.1 |
| 3.125 | 0.494850022 | 99.3 | 87.3 | 96   |
| 1.56  | 0.193124598 | 100  | 100  | 100  |

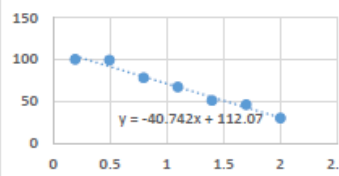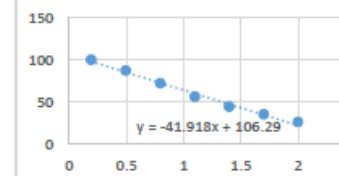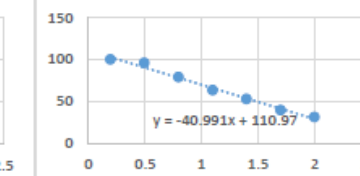

| 6k    |             |      |      |      |
|-------|-------------|------|------|------|
| 100   | 2           | 48.6 | 47.3 | 45.9 |
| 50    | 1.698970004 | 57.3 | 63   | 61.6 |
| 25    | 1.397940009 | 70.4 | 73.5 | 75.8 |
| 12.5  | 1.096910013 | 83.7 | 86.8 | 84.1 |
| 6.25  | 0.795880017 | 96.5 | 99.9 | 98.2 |
| 3.125 | 0.494850022 | 100  | 100  | 100  |
| 1.56  | 0.193124598 | 100  | 100  | 100  |

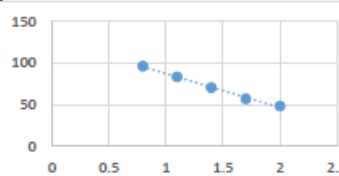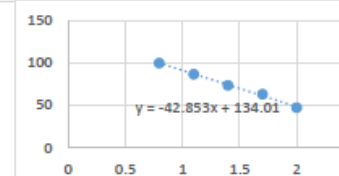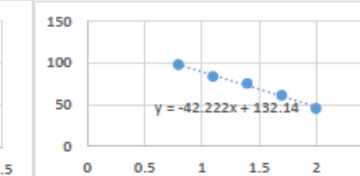

| 6l    |             |      |      |      |
|-------|-------------|------|------|------|
| 100   | 2           | 40.2 | 43.1 | 38.9 |
| 50    | 1.698970004 | 53.1 | 51   | 55.7 |
| 25    | 1.397940009 | 69.8 | 62.1 | 71.3 |
| 12.5  | 1.096910013 | 89.7 | 78.6 | 92.1 |
| 6.25  | 0.795880017 | 100  | 92.3 | 100  |
| 3.125 | 0.494850022 | 100  | 100  | 100  |
| 1.56  | 0.193124598 | 100  | 100  | 100  |

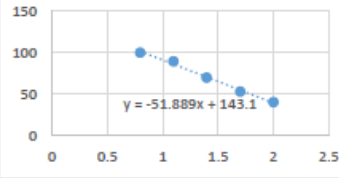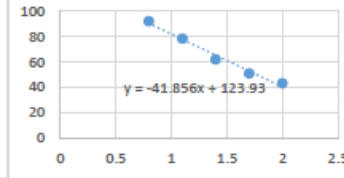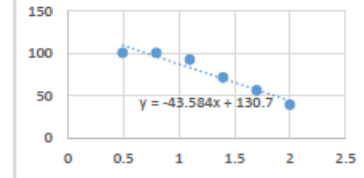

| 6m    |             |      |      |      |
|-------|-------------|------|------|------|
| 100   | 2           | 12.9 | 29.2 | 18.7 |
| 50    | 1.698970004 | 20.3 | 40.5 | 31.3 |
| 25    | 1.397940009 | 29.8 | 50.7 | 42.1 |
| 12.5  | 1.096910013 | 41   | 62.3 | 57.8 |
| 6.25  | 0.795880017 | 63.1 | 75.8 | 71.2 |
| 3.125 | 0.494850022 | 81.3 | 98   | 95.4 |
| 1.56  | 0.193124598 | 95.6 | 100  | 100  |

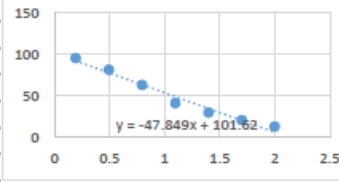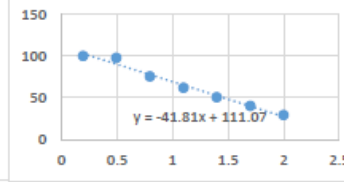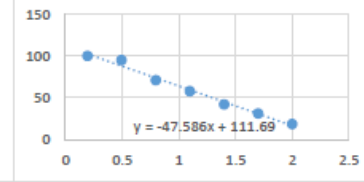

| 6n    |             |      |      |      |
|-------|-------------|------|------|------|
| 100   | 2           | 39   | 43.2 | 45.6 |
| 50    | 1.698970004 | 56.8 | 58.8 | 60.4 |
| 25    | 1.397940009 | 73.9 | 71.7 | 69.5 |
| 12.5  | 1.096910013 | 96.2 | 88   | 86.3 |
| 6.25  | 0.795880017 | 100  | 99.4 | 98.6 |
| 3.125 | 0.494850022 | 100  | 100  | 100  |
| 1.56  | 0.193124598 | 100  | 100  | 100  |

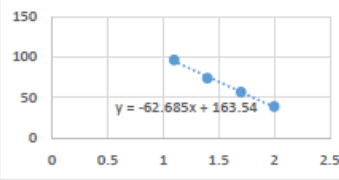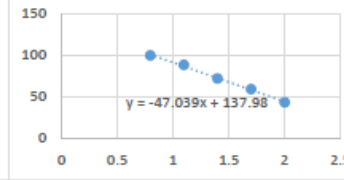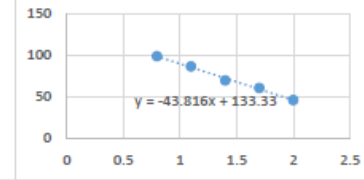

| 6o    |             |      |      |      |
|-------|-------------|------|------|------|
| 100   | 2           | 7.8  | 9.1  | 8.1  |
| 50    | 1.698970004 | 13.5 | 15.2 | 16.4 |
| 25    | 1.397940009 | 21   | 23   | 22.3 |
| 12.5  | 1.096910013 | 34   | 28.9 | 38.7 |
| 6.25  | 0.795880017 | 53.9 | 49.7 | 59.5 |
| 3.125 | 0.494850022 | 62.7 | 64.8 | 73.4 |
| 1.56  | 0.193124598 | 74.1 | 76.1 | 95.2 |

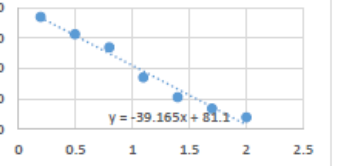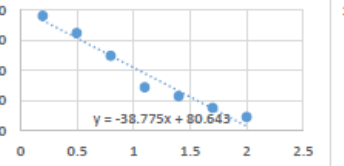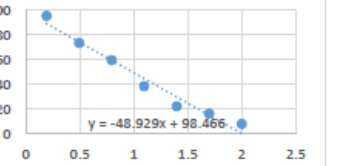

| 6p    |             |      |      |      |
|-------|-------------|------|------|------|
| 100   | 2           | 44.8 | 47.1 | 49.2 |
| 50    | 1.698970004 | 58.1 | 60.3 | 61.8 |
| 25    | 1.397940009 | 72.7 | 71.7 | 76.3 |
| 12.5  | 1.096910013 | 87.3 | 84.2 | 89.6 |
| 6.25  | 0.795880017 | 99.6 | 97.6 | 100  |
| 3.125 | 0.494850022 | 100  | 100  | 100  |
| 1.56  | 0.193124598 | 100  | 100  | 100  |

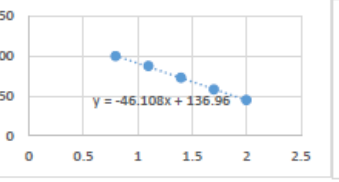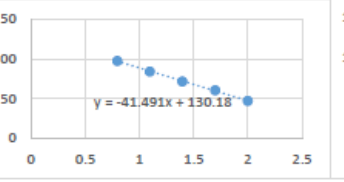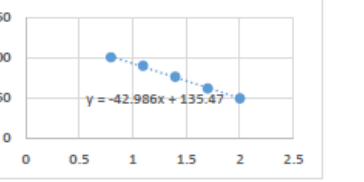

| 6q    |             |      |      |      |
|-------|-------------|------|------|------|
| 100   | 2           | 34.9 | 26.9 | 30.9 |
| 50    | 1.698970004 | 46.1 | 41.2 | 43.7 |
| 25    | 1.397940009 | 59   | 53.8 | 54.8 |
| 12.5  | 1.096910013 | 67.4 | 69.1 | 71.1 |
| 6.25  | 0.795880017 | 83.8 | 78.6 | 90.2 |
| 3.125 | 0.494850022 | 99.3 | 98.7 | 100  |
| 1.56  | 0.193124598 | 100  | 100  | 100  |

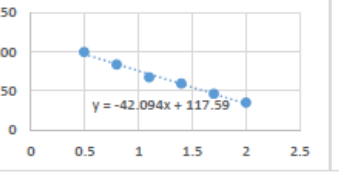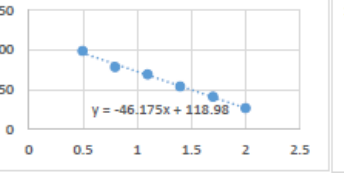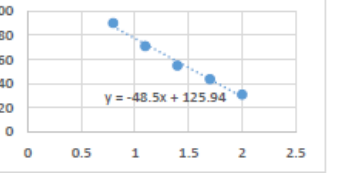

Supplement: d3ra05310e1.pdf [file d3ra05310e1.pdf]
